# Supplementary material
Source: PubMed Central journal article supplement (PMC3294427)
Supplement: supp_76.1.66_MMBR5011-11_supplement.pdf [file supp_76.1.66_MMBR5011-11_supplement.pdf]

## Supplemental File 1A

### Proteins used for Construction of Phylogenetic Tree

| Protein                                | Length (aa) <sup>#</sup> | Protein                                 | Length (aa) <sup>#</sup> |
|----------------------------------------|--------------------------|-----------------------------------------|--------------------------|
| GTP-binding protein                    | 362                      | 30S ribosomal protein S5                | 201                      |
| Dimethyladenosine transferase (KsgA)   | 286                      | Ribosomal protein S13                   | 126                      |
| 30S ribosomal protein S7               | 156                      | 50S ribosomal protein L13P              | 147                      |
| Elongation factor Tu                   | 397                      | 30S ribosomal protein S9                | 170                      |
| 50S ribosomal protein L11              | 144                      | 30S ribosomal protein S15               | 95                       |
| 50S ribosomal protein L1               | 241                      | Ribosomal protein S19                   | 93                       |
| RNA polymerase $\beta$ subunit (RpoB)  | 1161                     | Gyrase B                                | 686                      |
| RNA polymerase $\beta'$ subunit (RpoC) | 1299                     | Gyrase A                                | 857                      |
| 50S ribosomal protein L3               | 214                      | 50S ribosomal protein L10/L16           | 176                      |
| Ribosomal protein L4                   | 219                      | Preprotein translocase subunit SecY     | 437                      |
| Ribosomal protein L2                   | 278                      | RNA polymerase subunit alpha            | 340                      |
| 50S ribosomal protein L22              | 125                      | Threonyl-tRNA-synthetase                | 658                      |
| 30S ribosomal protein S3               | 277                      | Molecular chaperone DnaK (Hsp70)        | 618                      |
| 50S ribosomal protein L14              | 122                      | Chaperonin GroEL (Hsp60)                | 541                      |
| Ribosomal protein L5                   | 185                      | O-sialoglycoprotein endopeptidase       | 374                      |
| 30S ribosomal protein S8               | 132                      | Phosphatidate cytidylyltransferase      | 391                      |
| 50S ribosomal protein L6               | 179                      | CDP-diglyceride synthase (CdsA)         | 391                      |
|                                        |                          | DNA polymerase III subunit delta (holB) | 401                      |
|                                        |                          |                                         |                          |

The phylogenetic trees for the actinobacterial species (Fig. 2) based upon concatenated sequence alignment of the above proteins were constructed as described in our earlier work (2, 6).

<sup>#</sup> Protein length is from *S. coelicolor* A3(2).

---

## Supplemental File 1B

### Identification of CSIs and CSPs that are Specific for *Actinobacteria* or its various Clades

To identify CSIs that are specific for *Actinobacteria*, Blastp searches were carried out on various proteins (or open reading frames) from the genome of *Corynebacterium glutamicum* ATCC 13032 to retrieve high scoring homologs for 10-15 divergent actinobacterial species as well as 5-6 sequences from other phyla of *Bacteria*. Multiple sequence alignments of these proteins were created using the ClustalX 1.83 program (8) and these alignments were visually inspected to identify indels in conserved regions (i.e. flanking 30-40 aa on either side contain minimally 4-5 identical residues) that were restricted to either some or all of the actinobacterial species in the sequence alignments (1). The indels that were not flanked by conserved regions were not further considered, as they do not provide reliable molecular markers (4-7). The species distribution of all potentially useful indels was further evaluated by detailed Blastp searches (minimally 250 top hits) on short sequence segments containing the indels and their flanking conserved regions (between 60-150 aa depending upon the lengths of the indels) to determine the species-specificity of the indels. In cases where the indels were large, two separate Blastp searches were performed, one with a sequence containing the indel and the other with a sequence lacking the indel, to determine the presence or absence of the indel in different organisms. The sequence information for various CSIs from representative *Actinobacteria*-species that contain the CSIs and some outgroup species were compiled and formatted into signature files using certain in house programs.

Although sequence information for only a limited number of species are shown in different alignments, unless otherwise indicated these CSIs are specific for the indicated groups/clades. The inference whether a given CSI is an insert or a deletion is based upon the presence or absence of the CSIs in other groups or phyla of *Bacteria* (*Actinobacteria*). If the CSI in question is lacking in the outgroup species, then the absence of indel is the ancestral character state of the protein and the indel in this case is an insert in the indicated group of bacteria. On the other hand, if the outgroup species contained the sequence region (CSI) that is missing in a given clade of *Actinobacteria*, then the indel in question is interpreted as a deletion.

To identify CSPs those are specific for either all *Actinobacteria* or several of its subclades, Blastp searches were carried out on each ORF from the genomes of *Bifidobacterium longum* NCC2705, *B. dentium* ATCC 27678, *Corynebacterium glutamicum* ATCC 13032, *Frankia sp. Cc13*, *Mycobacterium leprae* TN, *Mycobacterium avium* 104, *Rhodococcus jostii* RHA1 and *Streptomyces coelicolor* A3(2). These searches were performed against all organisms (i.e. non-redundant (nr) database) using the default parameters, without the low complexity filter (3). The proteins that were of interest were those for whom either all observed blast hits were from the indicated groups of *Actinobacteria*, or those where a large increase in E values is observed from the last hit belonging to *Actinobacteria* (or its specific clade) and the first hit from any other bacteria/actinobacteria and the E values for the latter hits are  $>1e^{-03}$ , indicating weak similarity that could occur by chance. However, higher E values could be significant for smaller proteins as the magnitude of the E value depends upon the length of the query sequence (3). Hence, the lengths of the query proteins and those of various hits were also taken into consideration when analyzing the results of these studies. In most cases, the lengths of various significant hits were very similar to those of the query proteins.

#### Reference List

1. **Gao, B. and R. S. Gupta.** 2005. Conserved indels in protein sequences that are characteristic of the phylum *Actinobacteria*. *Int.J.Syst.Evol.Microbiol.* **55**:2401-2412.
2. **Gao, B., R. Mohan, and R. S. Gupta.** 2009. Phylogenomics and protein signatures elucidating the evolutionary relationships among the *Gammaproteobacteria*. *Int.J.Syst.Evol.Microbiol.* **59**:234-247.
3. **Gao, B., R. Parmanathan, and R. S. Gupta.** 2006. Signature proteins that are distinctive characteristics of *Actinobacteria* and their subgroups. *Antonie van Leeuwenhoek* **90**:69-91.
4. **Gupta, R. S.** 1997. Protein phylogenies and signature sequences: evolutionary relationships within prokaryotes and between prokaryotes and eukaryotes. *Antonie van Leeuwenhoek* **72**:49-61.
5. **Gupta, R. S.** 2000. The phylogeny of *Proteobacteria*: relationships to other eubacterial phyla and eukaryotes. *FEMS Microbiol.Rev.* **24**:367-402.
6. **Gupta, R. S.** 2009. Protein signatures (molecular synapomorphies) that are distinctive characteristics of the major cyanobacterial clades. *Int.J.Syst.Evol.Microbiol.* **59**:2510-2526.
7. **Gupta, R. S. and A. Shami.** 2011. Molecular signatures for the *Crenarchaeota* and the *Thaumarchaeota*. *Antonie van Leeuwenhoek* **99**:133-157.

8. **Jeanmougin, F., J. D. Thompson, M. Gouy, D. G. Higgins, and T. J. Gibson.** 1998. Multiple sequence alignment with Clustal x. *Trends Biochem.Sci.* **23**:403-405.

## Supplemental File 2

A conserved insert in the Glycyl-tRNA synthetase that is largely specific for *Actinobacteria*. Sequence information for only limited numbers of actinobacteria is shown. The information regarding the distribution of this CSI in different genera of *Actinobacteria* is provided in the Supplemental File 7. Besides actinobacteria, this insert is also present in *M. magentosprillum*.

|                                 |                                | 258                | GSE                  | 298                       |
|---------------------------------|--------------------------------|--------------------|----------------------|---------------------------|
| <i>Actinobacteria</i>           | Thermobifida fusca             | 72161265           | EKLSHYSKRTVDIEYRFNFA | WGEELEGIANRTDYDLSTH       |
|                                 | Corynebacterium glutamicum     | 19553476           | -----A----           | -----RV-                  |
|                                 | Mobiluncus curtisii            | 298345360          | -----A-G-E           | -----GV-                  |
|                                 | Nocardioopsis dassonvillei     | 297559717          | -----Q               | -----R--                  |
|                                 | Jonesia denitrificans          | 256832756          | -----G-T             | -----V-----R--            |
|                                 | Nocardioideaceae bacterium     | 326334002          | -----P               | -----F--G-                |
|                                 | Clavibacter michiganensis      | 148272762          | -----T-----G--       | -----R--                  |
|                                 | Actinomyces odontolyticus      | 154509410          | -----L---G-Q         | -----TV-                  |
|                                 | Streptosporangium roseum       | 271963873          | -----T               | -----V-----F--TA-         |
|                                 | Nakamurella multipartita       | 258652148          | -----H-Q             | -----F--K--               |
|                                 | Bifidobacterium longum         | 23464742           | -----K-G-Q           | -----D-----A-             |
|                                 | Kineococcus radiotolerans      | 152967313          | -----G-Q             | -----D-----F--G--         |
|                                 | Propionibacterium acnes        | 314928065          | -----K-G--           | -----D-----A-             |
|                                 | Gardnerella vaginalis          | 298253424          | -----D-V             | -----A-----F--            |
|                                 | Thermomonospora curvata        | 269127431          | -----K-G-Q           | -----D-----A-             |
|                                 | Scardovia inopinata            | 294790521          | -----P               | -----M-----F--S-          |
|                                 | Thermobispora bispora          | 296269165          | -----Q-Q             | -----V-----A--            |
|                                 | Rhodococcus equi               | 312140272          | -----K-G-S           | -----F--G--               |
|                                 | Cellulomonas flavigena         | 296130022          | -----T-----G--       | -----GA-----R--           |
|                                 | Clavibacter michiganensis      | 170782097          | -----T-----G-Q       | -----F--K--               |
|                                 | Xylanimonas cellulositytica    | 269956954          | -----T-----R-Q       | -----V-----K-             |
|                                 | Nocardia farcinica             | 54023426           | -----A-----S-G       | -----V-----S-             |
|                                 | Streptomyces coelicolor        | 21220965           | -----E-T             | -----Q-----F--T-          |
|                                 | Pseudonocardia dioxanivorans   | 331698238          | -----T-----G-Q       | -----F--K--               |
|                                 | Geodermatophilus obscurus      | 284990200          | -----A-----G-Q       | -----V-----F--            |
|                                 | Aeromicrobium marinum          | 311744086          | -----T-----G-T       | -----F--K--               |
|                                 | Beutenbergia cavernae          | 229820268          | -----A-----Q-G       | -----N-----NA-            |
|                                 | Streptomyces scabiei           | 290960578          | -----S---V--K-G-G    | -----NP-----V-----        |
|                                 | Gordonia neofelifaecis         | 326381627          | -----A-----G-P       | -----L--A-----F--A-       |
|                                 | Acidothermus cellulolyticus    | 117928006          | -----A-----G         | -----FS---V-----TV-       |
|                                 | Kitasatospora setae            | 311895944          | -----G-T-----G-Q     | -----F--                  |
|                                 | Arthrobacter aurescens         | 119963161          | D-----D-----K-G-M    | -----NP-----V-----F--     |
|                                 | Mycobacterium tuberculosis     | 217069510          | -----Q-G             | -----T--FA-----F--        |
|                                 | Salinispora arenicola          | 159039341          | -----G               | -----Q--FS---V-----F--    |
|                                 | Catenulispora acidiphila       | 256396139          | -----K--G            | -----K--FD-----F--        |
|                                 | Kribbella flavida              | 284030420          | -----G-----E--       | -----F-----F--G--         |
|                                 | Tsukamurella paurometabola     | 296140437          | -----R-G             | -----FA-----F--A--        |
|                                 | Micromonospora aurantiaca      | 302869265          | DS-A-----I---K-E--   | -----M-V---A-F--K--       |
|                                 | Leifsonia xyli                 | 50954005           | D-----D--I-L---G-S   | -----F--M-V-----F--V-     |
|                                 | Kytococcus sedentarius         | 256825028          | D--A--A-----G-G      | -----K--FD-----F--C-      |
|                                 | Stackebrandtia nassauensis     | 291299567          | -ERA--AG-I-V---G-Q   | -----M-V-----GV-          |
|                                 | Rothia mucilaginoso            | 255327243          | A---SG-I-V---G-Q     | -----M-V-----G--          |
|                                 | Brevibacterium linens          | 260903902          | DERA--AG-I-F--K-G-S  | -----N-----M-V-----TQ-    |
|                                 | Dietzia cinnamea               | 319947863          | DERA--DA-I-L--K-G-Q  | -----NP-----M-V-----F--N- |
|                                 | Brevibacterium mcbrellneri     | 295394795          | DE----S-----F--PWG   | -----Y-----F--RA-         |
| Rubrobacter ferrooxidans        | 256372043                      | -----N-P--         | -----S-----RR-       |                           |
| Rubrobacter xylanophilus        | 108803618                      | -----T-----G-S     | -----F--K--          |                           |
| → Magnetosprillum magnetotactic | 46206189                       | DE----NA-T---K-P-G | -----W---S-----RQ-   |                           |
| Other Bacteria                  | Staphylococcus epidermidis     | 251810982          | -E-----NA-T---H-P-G  | -----W---S-----KR-        |
|                                 | Geobacillus kaustophilus       | 56421965           | DE----NA-T---K-P-G   | -----W---S---F--RK-       |
|                                 | Staphylococcus aureus          | 258423993          | -E----TA-T---N-P-G   | -----W-----F--RQ-         |
|                                 | Thermoanaerobacter ethanolicus | 326389845          | -E-AF--A-----L-P-G   | -----W---D-----KQ-        |
|                                 | Clostridium tetani             | 28209979           | DE----SA-S---L-P-G   | -----L-V-----F--KA-       |
|                                 | Mycoplasma agalactiae          | 291320191          | -E----NA-T---FK-P-G  | -----W---S---F--KR-       |
|                                 | Bacillus cereus                | 152977206          | -E--F--A-T-V-FL-P-G  | -----W---D-----TQ-        |
|                                 | Ruminococcus obeum             | 153810740          | E-AF--G-T---FL-P-G   | -----W---D-----GR-        |
|                                 | Eubacterium rectale            | 238924230          | -E-----NG-T-V--E-P-G | -----W---S--N---TQ-       |
|                                 | Fibrobacter succinogenes       | 261417441          | -D-----A-T-L--LYP-G  | -----N--W-----KA-         |
|                                 | Thermobaculum terrenum         | 269926946          | ---A--ADAA---Q-L-PMG | -Q-V---HS-----RR-         |
|                                 | Rhodothermus marinus           | 268318023          | ---A--ADAAS---F--P-G | FK-----HS---F--S-         |
|                                 | Flavobacteria bacterium        | 225012118          | -E--F--EG-S---FKY--G | -----W---S-----NQ-        |
|                                 | Leptospira interrogans         | 45658196           | DE-A--A-EA---Q-E-P-G | -R-----VH-----R-          |
|                                 | Spirochaeta thermophila        | 307719119          | QE----RK---F--F-P-G  | -K--C-L-Y-----RR-         |
|                                 | Thermomicrobium roseum         | 221633039          | DE-----F--E-P-G      | -K--C-L-Y---F--RR-        |
|                                 | Sphaerobacter thermophilus     | 269836498          | -E-A--A-A---L---PHG  | LE-----F--GS-             |
|                                 | Thermus thermophilus           | 2664208            |                      |                           |

Supplemental File 3

A conserved insert in the tRNA (Guanine-1)-methyltransferase (TrmD) protein that is largely specific for *Actinobacteria*. Sequence information for only limited numbers of *Actinobacteria* is shown. The information regarding distribution of this CSI in different *Actinobacteria* genera is provided in the Supplemental File 7.

|                                      |                                    | 113                          | 145                                |
|--------------------------------------|------------------------------------|------------------------------|------------------------------------|
| Actinobacteria                       | <i>Actinomyces coleocanis</i>      | 227495317                    | YEGIDYRVEHYRN AGEIEV FEYSIGDYVLNGG |
|                                      | <i>Intrasporangium calvum</i>      | 317125414                    | -----E--Y-YS-A DLGL-- SVV-L-----   |
|                                      | <i>Beutenbergia cavernae</i>       | 229821020                    | -----A--A-R-AG EPGVT- R-V-----     |
|                                      | <i>Mobiluncus mulieris</i>         | 307700237                    | -----A--A---E VPNV-- ----L-----    |
|                                      | <i>Actinomyces viscosus</i>        | 326771774                    | -----A--P---AS R G--- R-L-----     |
|                                      | <i>Actinomyces odontolyticus</i>   | 293189835                    | -----A--A-Y--G - GV-- V-F-----     |
|                                      | <i>Bifidobacterium dentium</i>     | 306823691                    | ---Y-A-IPQY--A Q GVD- R-----       |
|                                      | <i>Bifido. adolescentis</i>        | 154486606                    | ---Y-A-IPQY--A Q GVD- R-----       |
|                                      | <i>Gardnerella vaginalis</i>       | 298253302                    | ---Y-A-IP-Y--A Q G-D- R-----       |
|                                      | <i>Scardovia inopinata</i>         | 294791384                    | ---Y-A-IPTY--E R GLD- R-----       |
|                                      | <i>Parascardovia denticolens</i>   | 315227049                    | ---Y-A-LPLY--K R GLN- R-----       |
|                                      | <i>Sanguibacter keddieii</i>       | 269795665                    | -----A--A--H-A - GGT- R-L-----     |
|                                      | <i>Xylanimonas cellulosilytica</i> | 269955970                    | -----A--A---A S GRR- S-L-----      |
|                                      | <i>Pseudonocardia</i> sp. P1       | 324999609                    | -----E--LLDA-A R GTR- D-V-----V--  |
|                                      | <i>Jonesia denitrificans</i>       | 256832220                    | -----A--AD---D R G--- A-L-----     |
|                                      | <i>Corynebacterium glutamicum</i>  | 62390887                     | -----Q--IDDA- R YR- R-V-----I--    |
|                                      | <i>Thermobispora bispora</i>       | 296268966                    | -----A--DE--S R LR- D-V-----A--    |
|                                      | <i>Salinispora arenicola</i>       | 159036843                    | -----Q--LD-AAS R MP- T-V-L----F--  |
|                                      | <i>Nocardioidaceae bacterium</i>   | 326333672                    | -----Q--LD-AAT R A-- R-I-L-----    |
|                                      | <i>Kineococcus radiotolerans</i>   | 152965369                    | -----A-----T R VR- R-V-L-----      |
|                                      | <i>Cellulomonas flavigena</i>      | 296129320                    | -----A-----AA R GR- T-V-L-----     |
|                                      | <i>Kribbella flavida</i>           | 284032644                    | -----A--ASYAAE R MR- D-V-----      |
|                                      | <i>Thermobifida fusca</i>          | 72161069                     | -----A--AVDAAQ R MP- E-L-----      |
|                                      | <i>Nocardioidaceae bacterium</i>   | 326333672                    | -----Q--LD-AAT R A-- R-I-L-----    |
|                                      | <i>Propionibacterium acnes</i>     | 289426484                    | -----H--IDYA-S M WT- H-V-L-----    |
|                                      | <i>Kytococcus sedentarius</i>      | 256824952                    | -----E--LE-AQ R LDL RIL-L-----     |
|                                      | <i>Brevibacterium linens</i>       | 260907255                    | -----Q--IDWSAE H FDL RPM-----      |
|                                      | <i>Renibacterium salmoninarum</i>  | 163839831                    | -----E--DWA-E S FT- RPM-L-----     |
|                                      | <i>Mesoplasma florum</i>           | 50365357                     | ---F-E-ILKYIDV -I-----T--          |
|                                      | <i>Spirochaeta thermophila</i>     | 315185657                    | ---V-Q--LDF--A R-----SS-           |
|                                      | <i>Synechococcus</i> sp. JA-2-3B   | 86608693                     | ---F-E-IRQLAT R-V-L--F--T--        |
|                                      | <i>Deinococcus deserti</i>         | 226355969                    | ---F-A--GLVT R-L---F-MM--          |
|                                      | <i>Paenibacillus</i> sp. JDR-2     | 251797468                    | ---Y-E-IR-YLVT D-L-----T--         |
|                                      | <i>Borrelia burgdorferi</i>        | 225548990                    | -----Q-IIDL-VD --I-----SS-         |
|                                      | <i>Rhodobacter sphaeroides</i>     | 332559519                    | F--V-Q--LDA-AV E-V-L--F--T--       |
|                                      | <i>Rickettsia prowazekii</i>       | 15603988                     | -----E--IAE-NV T-V-V---I-S--       |
|                                      | <i>Escherichia coli</i>            | 15803129                     | -----E--IQTEID E-W-----S--         |
|                                      | <i>Rhizobium leguminosarum</i>     | 116254278                    | F--V-Q--I-ARGL E-V-----S--         |
|                                      | <i>Yersinia pestis</i>             | 294505007                    | ---V-E--IKTEID E-W-----S--         |
|                                      | <i>Legionella pneumophila</i>      | 148360986                    | -----E-IIN-HID E-W-L--F--S--       |
|                                      | <i>Pseudomonas fluorescens</i>     | 70728478                     | -----E-FIDAHVD E-W-----S--         |
|                                      | <i>Proteus mirabilis</i>           | 197284285                    | -----E--IQTEID E-W-V----S--        |
|                                      | <i>Leptospir. ferrodiazotroph</i>  | 251772984                    | ---V-Q-ILDS-PF E-W-C----S--        |
|                                      | <i>Lentisphaera araneosa</i>       | 149196240                    | ---V-Q--LDGIID R-I-----I-SN-       |
|                                      | <i>Alkali. metalliredigens</i>     | 150390504                    | -----Q-IIDELVT D-I-----T--         |
| <i>Peptostrepto. anaerobius</i>      | 289423973                          | ---V-Q-IIDLIVT D-V-----T--   |                                    |
| <i>Clostridium difficile</i>         | 255655267                          | -----E-IIDLIVT D-I-----T--   |                                    |
| <i>Leptotrichia hofstadii</i>        | 260889502                          | ---L-Q--IDKFVD E-I-----SS-   |                                    |
| <i>Thermomicrobium roseum</i>        | 221632260                          | -----D--RIIL-A R-L-----T--   |                                    |
| <i>Burkholderiales bacterium</i>     | 303257146                          | -----Q-FLDT-VD ETL-----S--   |                                    |
| <i>Methylobacillus flagellatus</i>   | 91776684                           | ---V-E-LLSTLVD E-----S--     |                                    |
| <i>Flavobacteria bacterium</i>       | 126663570                          | -K-V-Q--RDMHIT R-I-----S--   |                                    |
| <i>Gramella forsetii</i>             | 120434979                          | -K-V-Q--RDQFIT K-I-----S--   |                                    |
| <i>Salinibacter ruber</i>            | 294507642                          | -K--Q--RDLLVT R-V---V--S--   |                                    |
| <i>Verrucomicrobium spinosum</i>     | 171910506                          | ---V-Q-I-DTCVD E-I-L-----TN- |                                    |
| <i>Parachlamydia acanthamoebae</i>   | 282889842                          | -----Q-AIDREVD E-I-----TN-   |                                    |
| <i>Rhodopirellula baltica</i>        | 327537882                          | ---F-Q--LDILQP E-I----F----- |                                    |
| <i>Thermosynechococcus elongatus</i> | 22299154                           | ---V-E-----LVT Q-I----F--TC- |                                    |
| <i>Chloroflexus aurantiacus</i>      | 163845944                          | -----E--R-TLID R-L-----T--   |                                    |
| <i>Thermobaculum terrenum</i>        | 269925822                          | ---V-E--R--LAT M-L-----S--   |                                    |
| <i>Campylobacter jejuni</i>          | 205355555                          | -----E--L-IFA- EVF---FI-T--  |                                    |
| <i>Geobacter sulfurreducens</i>      | 298504762                          | -----E--RDLFVD D-F---F--T--  |                                    |
| <i>Terriglobus saanensis</i>         | 320107355                          | ---V-E--SQMLCD R-L-----S--   |                                    |

Supplemental File 4

A conserved insert in the DNA Gyrase A protein that is largely specific for **Actinobacteria**. Sequence information for only limited numbers of actinobacteria is shown. The information regarding the distribution of this CSI in other *Actinobacteria* genera is provided in the Supplemental File 7.

|  |                             | 180      |                                 | 230                   |
|--|-----------------------------|----------|---------------------------------|-----------------------|
|  | Mycobacterium tuberculosis  | 15425192 | GIAVGMATNIPPHNLRELADAVFWALENHDA | DEEE TLAAVMGRVKGPDFPT |
|  | Rhodococcus equi            | 12137524 | -----V-E-IY---D-E-              | --A--E-E-----         |
|  | Nocardia farcinica          | 4021971  | -----T---E-IY---D---            | ---T---C-E-I-----     |
|  | Saccharomonospora viridis   | 57054096 | -----VV-G-I---D-P---            | -----L-Q-I-----       |
|  | Tsukamurella paurometabola  | 96137760 | -----I-E---C---Y---             | -S-A--E-C-E-----      |
|  | Segniliparus rugosus        | 17509460 | -----V-----H---                 | --AT--E-KEI-----      |
|  | Segniliparus rotundus       | 96392547 | -----V---I---H---               | --AS--E-KEI-----      |
|  | Gordonia bronchialis        | 62200052 | -----V---I---HP---              | -D-T---C-EAI-----     |
|  | Dietzia cinnamea            | 19950291 | -----KM-----V-E-IY-C-D-P---     | S-----C-E-I-----      |
|  | Actinosynnema mirum         | 56374167 | -----V-EG-V---D-PE-             | SD--E-MIA-I-----      |
|  | Corynebacterium glutamicum  | 9551262  | -----N---I---L---P-             | E-S-A-E-C-KF-----     |
|  | Streptosporangium roseum    | 71961617 | -----V-G-R---Q-PE-              | SD-L-E-LIA-----       |
|  | Saccharopolyspora erythraea | 34096627 | -----V-G-V---PE-                | -D-A-L-E-LIE-I-----   |
|  | Gardnerella vaginalis       | 97243225 | -----M-V-G-H---DHP--            | SK-L-E-LIQ-I-----     |
|  | Amycolatopsis mediterranei  | 00781944 | -----VSEG-V---PE-               | TDD-L---LLV-I-----    |
|  | Mobiluncus mulieris         | 27876547 | -----R-----I---AL-Y---PE-       | SR--L-E-A-Q-I-----    |
|  | Kineococcus radiotolerans   | 52963979 | -----V-EGAK-L-D-P--             | SD-Q---LLT-I-----     |
|  | Thermobifida fusca          | 2160413  | -----V-EG-Y-Y-DHP--             | SD-L-D-LIE-I-----     |
|  | Cellulomonas flavigena      | 96127876 | -----V-AG-Q-H---HP-             | SK-L-E-L-A-I-----     |
|  | Stackebrandtia nassauensis  | 91297545 | -----K-----V-A-N-C-D-TE-        | ----E-LIKL-Q-----     |
|  | Thermomonospora curvata     | 69124284 | -----VTEG---Y-D-YHV             | SD-L-D-LIE-I-----     |
|  | Acidothermus cellulolyticus | 17927217 | -----V-AGA-Q---HP--             | TR-L---LLE-I-----     |
|  | Nakamurella multipartita    | 58650279 | -----V-S-V-F---PE-              | SP-L-E-S-E-IQ-----    |
|  | Xylanimonas cellulolytica   | 69954817 | -----V-EG-R-H-AHPE-             | SR-L---L-Q-----       |
|  | Bifidobacterium animalis    | 83602674 | -----M-V-G-H---DHPE-            | SR-L-D-LIE-I-----     |
|  | Kocuria rhizophila          | 84199652 | -----V-G-Q-Y-Q-P-V              | -R-T-L-EELIK-----S    |
|  | Rothia mucilaginosa         | 55326476 | -----V-EG-E-F-K-PH-             | TN--L-N-L-A-I-----    |
|  | Streptomyces coelicolor     | 437481   | -----V-AGA-Q-Y---YE-            | SH-L-D-LIE-I-----     |
|  | Beutenbergia cavernae       | 29818509 | -----V-EG-E-F---HP-             | TN--L-G-LLL-I-----    |
|  | Kribbella flavida           | 84028010 | -----Q-----V-A-AN-C---P-        | SQ-V---C-EHI-----     |
|  | Jonesia denitrificans       | 56831261 | -----V-EG-A-Y-A-P-              | SR--LRE-LIA-I-----    |
|  | Tropheryma whipplei         | 8492973  | -----A-VSAGAL-C---P-            | TD--LTE-LLE-I-----    |
|  | Salinispora tropica         | 45592575 | -----K-----IGA-Q-C---HPE-       | --AS--E-LL-I-----     |
|  | Frankia alni                | 11219513 | -----V-TG-Q---DHAE-             | TD--L-E-LI-II-----    |
|  | Kitasatospora setae         | 11897313 | -----V-SGAL---HPG-              | SN--L-E-LVE-I-----    |
|  | Propionibac. freudenreich   | 97625215 | -----VNE-Q-F---HPE-             | SD--L-E-S-A-----      |
|  | Thermobispora bispora       | 96268005 | -----TGE-Q---HPEL               | SD-L-EGLIE-I-----     |
|  | Renibacterium salomoniarum  | 63838776 | -----V-EGA-Q-Y-A-PT-            | SK--L-E-LIQ-I-----    |
|  | Nocardioideaceae bacterium  | 26329137 | -----V-SGAK---HP-               | TR--LQD-LIE-----      |
|  | Catenulispora acidiphila    | 56389239 | -----S---VN-G-Q-F-Q-PE-         | TN--L-E-LIE-I-----    |
|  | Micrococcus luteus          | 89705901 | -----M-V-AG-Q-Y---HPE-          | TR--L-E-LLA-H-----    |
|  | Micromonospora aurantiaca   | 02864518 | -----K-----IGA-Q-C---HPE-       | --AT--E-LLEI-----     |
|  | Actinomyces coleocanis      | 27494194 | -----R-----V-EG-Q-Y-DHPE-       | SR--L-N-LI-I-----     |
|  | Sanguibacter keddieii       | 69793365 | -----V-EG-Q-Y-DHP--             | SP--V-DSLIRII-----    |
|  | Leifsonia xyli              | 0953932  | -----V-QGAL-H-AHPE-             | SR--L-EELIK-I-----    |
|  | Parascardovia denticolens   | 94786214 | -----M-V-QG-H---DHPE-           | SR--L-NNLIAII-----    |
|  | Brevibacterium linens       | 60904976 | -----V-AGA-Q-L-SHPE-            | SK--A-E-LL-I-----     |
|  | Arthrobacter aurescens      | 19961287 | -----V-EG-Q---D-PT-             | TR--L-E-LLL-I-----    |
|  | Kytococcus sedentarius      | 56823912 | -----Q-----V-EGCQ-L-D-PE-       | TK--LQEKLLQVI-----    |
|  | Clavibacter michiganensis   | 48271185 | -----V-SGAQ-L-AHP-              | NR--L-E-LLE-I-----    |
|  | Eubacterium rectale         | 38922438 | -----VVN-VRLID-DIE              | -K-T--DELIDV-----     |
|  | Synergistetes bacterium     | 95111080 | -----VT-VLC-L---EGIN            | PA-A-S--DL-E-LP-----  |
|  | Campylobacter jejuni        | 8564562  | -----S-N--I-GLLYL-D-K--         | S-EEI-QFI-----        |
|  | Helicobacter pylori         | 61839476 | -----S---KID-II--LIHV--PN-      | E-DEILEF-----         |
|  | Thermotoga maritima         | 645226   | -----S-TV--LIYLDHPE-            | --VEEL-QFI-----       |
|  | Bacillus subtilis           | 19444321 | -----Q-G-II-G-LAVS--P-I         | --ISEL-EFIP-----      |
|  | Fusobacterium nucleatum     | 9705415  | -----G-V-GILAIID-K-I            | EILEL-NYI-----        |
|  | Dehalococco. ethenogenes    | 7233707  | -----A--CQ-ICYLID-P-C           | GWDDL-QF-S-----       |
|  | Pseudomonas aeruginosa      | 5598364  | -----G-VI-GCLALMD-P-L           | --VDEL-QYIP-----      |
|  | Haemophilus influenzae      | 09972999 | -----N-VLNGCLAYID-NEI           | --IDEL-QHIP-----      |
|  | Coxiella burnetii           | 09364105 | -----N-IIN-TLALI--P-L           | --NVEEL-RHIP-----     |
|  | Burkholderia mallei         | 21598728 | -----N-VV--CLYL-N-PQ-           | --SVDELIEITPA-----    |
|  | Ralstonia eutropha          | 13866815 | -----N-IV-GCLHL-R-PQ-           | --VDELIELTIPA-----    |
|  | Rickettsia prowazekii       | 5603946  | -----H-C--LlyLD-PQ-             | --GINDI-NFI-----      |
|  | Dictyoglomus thermophilum   | 06901654 | -----G--I--LlyLI-KPE-           | --EIEELNFI-----       |
|  | Chloroflexus aggregans      | 19849213 | -----G-C--ISYLDHPE-             | --VEEL-EIIP-----      |
|  | Leptospirillum rubarum      | 24516515 | -----IT-II-GLLALID-P-L          | --SVDDLAI-H-----      |
|  | Thermobaculum terrenum      | 69926182 | -----IC-GLIYLDHP--              | --IEDLSKI-Q-----      |
|  | Deferribacter desulfuricans | 91278437 | -----T-VI--LVYIID-PSN           | --DEEILNFI-----       |
|  | Thermomicrobium roseum      | 21632669 | -----G-VV--LVYLD-PE-            | --VEELVE-LP-----      |
|  | Bacteroides fragilis        | 3713702  | -----M-----S-VI--CEAY-D-K-V     | --VEEL-EY--A-----     |
|  | Thermovibrio ammonificans   | 19790113 | -----IS-VCK--QYLDHPE-           | --TEEL-QFI-----       |
|  | Synechococcus sp. BL107     | 16071053 | -----N--I-GLMALIN-PEI           | --SDQEL-TLIP-----     |
|  | Chlamydomphila pecorum      | 30444524 | -----G--IE-TLLL-S-PT-           | --SIEEI-EVMP-----     |

Actinobacteria

Other Bacteria

Supplemental File 5

A conserved insert in S-adenosylhomocysteine hydrolase protein that is largely specific for *Actinobacteria*. Sequence information for only limited numbers of actinobacteria is shown. The information regarding distribution of this CSI in other *Actinobacteria* genera is provided in the Supplemental File 7.

|                            |                                | 83        | 83              | 122                     |
|----------------------------|--------------------------------|-----------|-----------------|-------------------------|
|                            | Streptomyces coelicolor        | 21221466  | NIFSTQDHAAAAIAV | GPNGTPDNP               |
|                            | Thermobispora bispora          | 296268748 | -----VV-        | QGVPVFAWKGETLEEY        |
|                            | Thermomonospora curvata        | 269128253 | -----VV-        | -----                   |
|                            | Kitasatospora setae            | 311896336 | -----VV-        | -----ED-                |
|                            | Thermobifida fusca             | 72162904  | -----VV-        | --D-----R-----          |
|                            | Frankia alni                   | 111226112 | -----V-         | -----K-D-----           |
|                            | Streptosporangium roseum       | 271962934 | -----VV-        | -----V-D-----           |
|                            | Gordonia bronchialis           | 262203513 | -----V-         | --H-----E-K-----        |
|                            | Acidothermus cellulolyticus    | 117927677 | -----VV-        | --D---Q- R-----I---     |
|                            | Mycobacterium tuberculosis     | 215432212 | -----VV-        | --H---E- K-----         |
|                            | Rhodococcus jostii             | 111023285 | -----V-         | --H---EE- --T-----      |
|                            | Tsukamurella paurometabola     | 296138919 | -----E---VV-    | -----EA-----            |
|                            | Amycolatopsis mediterranei     | 300789821 | -----V-         | --H---EE- K-----S---    |
|                            | Jonesia denitrificans          | 256833056 | -----E-----     | --T-----S-----S---      |
|                            | Corynebacterium diphtheriae    | 38233299  | -----E---VV-    | --H---ED-----           |
|                            | Kribbella flavida              | 284029568 | -----VV-        | --D--A-A- A-----        |
|                            | Saccharomonospora viridis      | 257056680 | --Y---E---VV-   | -R---K- E-----          |
|                            | Actinosynnema mirum            | 256380309 | -----VV-        | --H---EE- R-----S-A--   |
|                            | Dietzia cinnamea               | 319949854 | -----E---VV-    | --E---EE- R-----        |
|                            | Saccharopolyspora erythraea    | 134102884 | -----D-S---VV-  | --H---E- R-----         |
|                            | Salinispora arenicola          | 159036558 | -----VV-        | --E-S-QA- A-----S---    |
|                            | Micromonospora aurantiaca      | 302865499 | -----V-         | --E---EA- A---Y-----P-- |
|                            | Nocardia farcinica             | 54026586  | -----VV-        | --H--VEE- K--S-----     |
|                            | Geodermatophilus obscurus      | 284992665 | -----V-         | -D---EQ- A-----         |
|                            | Salinispora tropica            | 145593523 | -----VV-        | --E-S-EAL A-----S---    |
|                            | Arthrobacter aurescens         | 119961459 | -----E---VV-    | -K---E- L-----          |
|                            | Aeromicrobium marinum          | 311743632 | -----VV-        | -RD--AAD- K-T-----A--   |
|                            | Janibacter sp. HTCC2649        | 84498166  | --Y---E---VV-   | --E--VED- ---Y-----P--  |
|                            | Amycolatopsis mediterranei     | 300787136 | -----E---VV-    | --E--V-A- A-TS-----     |
|                            | Nakamurella multipartita       | 258654379 | -----VV-        | -KY--VEE- K-T-----P--   |
|                            | Micrococcus luteus             | 289704918 | -----E---VV-    | -S---ED- ---N-S--D-     |
|                            | Stackebrandtia nassauensis     | 291300565 | -----E---VV-    | -RE--VAA- K-T-----      |
|                            | Kineococcus radiotolerans      | 152967781 | -----Q---VV-    | -S--VEE- A-----         |
|                            | Renibacterium salmoninarum     | 163841741 | -----E---TV-    | -S--I-A- A-----         |
|                            | Brevibacterium linens          | 260906683 | -----E---VV-    | -T-SVGA- A-----         |
|                            | Saccharopolyspora erythraea    | 134100432 | -----D-A---VV-  | -----EK- E-TS-----      |
|                            | Verrucospora maris             | 330467562 | --Y---E---VV-   | -Q--VGQ- A---Y-----S-R- |
|                            | Catenulispora acidiphila       | 256396703 | -----V-         | -AG--EA- A-----         |
|                            | Nocardioideaceae bacterium     | 326334180 | -----VV-        | -K---ED- --T-----A--    |
|                            | Catenulispora acidiphila       | 256395873 | -----E---VV-    | --D---GK- T-TS-----     |
|                            | Sanguibacter keddiei           | 269794250 | -----E---VV-    | --H--VED- ---S---       |
|                            | Geodermatophilus obscurus      | 284992665 | -----V-         | -D---EQ- A-----         |
|                            | Segniliparus rugosus           | 317508026 | -----VV-        | --H--V-E- K-----D--     |
|                            | Pseudonocardia dioxanivorans   | 331698938 | -----TV-        | --T---EA- A-----        |
|                            | Verrucospora maris             | 330465911 | -----V-         | --D---A- A---Y-----Q--  |
|                            | Intrasporangium calvum         | 317125631 | -----E---VV-    | --H---ED- -----         |
|                            | Conexibacter woesei DSM        | 284046058 | -----V-         | -----E- -----           |
|                            | Clavibacter michiganensis      | 170781092 | -----E---V-     | -AG--EA- A-----         |
|                            | Streptomyces pristinaespiralis | 297196593 | -----A          | A-I-----                |
|                            | Genmatimonas aurantiaca        | 226229258 | -----V-         | -----V-K- --T-----      |
| Other bacteria with insert | Anaeromyxobacter dehalogenans  | 220915295 | -----V-         | -RE---EA- R-----        |
|                            | Fibrobacter succinogenes       | 261415685 | -----N---VV-    | -K--SVS-- ---S---       |
|                            | Desulfuromonas acetoxidans     | 95928711  | -----E          | T-----Y--S---           |
|                            | Xylella fastidiosa             | 9105979   | -----T          | S-T-----                |
|                            | Coxiella burnetii              | 164685840 | -----L-Q        | K-I-I-----E---          |
|                            | Waddlia chondrophila           | 297621233 | --Y-----H       | -----M-E---             |
|                            | Synechococcus sp. RCC307       | 148241205 | -----E          | R-I---Y---D--           |
|                            | Legionella pneumophila         | 54294919  | -----S--A       | K-I---Y---E---          |
|                            | Oceanicaulis alexandrii        | 83945799  | -----D          | K-I---Y-----            |
| Other Bacteria             | Opiritatus terrae              | 182415662 | -----K          | A-----                  |
|                            | Chlorobium ferrooxidans        | 110598853 | -----K          | A-----D--               |
|                            | Acidobacterium sp. MP5ACTX8    | 299135590 | -----A          | A-----                  |
|                            | Parabacteroides johnsonii      | 218259482 | -----A          | D-----                  |
|                            | Leptothrix cholodnii           | 171056810 | -----L--        | --T---Y---AD-           |
|                            | Victivallis vadensis           | 281357863 | -----A          | D-----                  |
|                            | Denitrovibrio acetiphilus      | 291287351 | -----A          | T-----S---              |

Supplemental File 6

A conserved insert in the enzyme Serine hydroxymethyl transferase that is largely specific for *Actinobacteria*. Sequence information for only limited numbers of actinobacteria is shown. The information regarding distribution of this CSI in other *Actinobacteria* genera is provided in the Supplemental File 7.

|                             |                              | 266                                              | 317                                                      |
|-----------------------------|------------------------------|--------------------------------------------------|----------------------------------------------------------|
| Actinobacteria              | Streptomyces griseus         | 182435840                                        | IAAKAVSFKIAAGEEFKERQQRRLD GARILAERL VQPDV TEVGVSVLSSGGTD |
|                             | Renibacterium salmoninarum   | 163840469                                        | --G--A-----S-----V-E----- --D-- KAK-I--VT----            |
|                             | Nocardia farcinica           | 54026787                                         | -----A--GT--RD-----S--K----- TGA-- ADK-I---T----         |
|                             | Bifidobacterium dentium      | 283456143                                        | --G--A--V--S---D-M-----K----- TAD-- KNN-I---T----        |
|                             | Amycolatopsis mediterranei   | 300783738                                        | -----AL---SD--R--E--E-S---A-- S-D-C ASA--R--T----        |
|                             | Streptomyces avermitilis     | 29829317                                         | -----V--SDD-----E-V-E-----I-D-- --RD-- KA---D-----       |
|                             | Arthrobacter aurescens       | 119962515                                        | -----A---G-----E-V-E-----I-D-- N-S-- A-A---T-----        |
|                             | Kocuria rhizophila           | 184201446                                        | --G--A-----S-G-A---R--IE--Q----- TA--L A-H-----T----     |
|                             | Actinomyces viscosus         | 326774134                                        | -----AM--GT--R--E--VR--A-I----- GAD-- KAA---LVT----      |
|                             | Saccharomonospora viridis    | 257055377                                        | -----AL---S---R-----V-E--K----- SAS-C ASA--R--T----      |
|                             | Dietzia cinnamea             | 319950195                                        | -----TAM--GT-Q-R-----E-K----- TAE-C RNA-----T----        |
|                             | Corynebacterium diphtheriae  | 38233528                                         | -V---AM-----T---D-----Q-I----- TGA-C KAA--D--T----       |
|                             | Aeromicrobium marinum        | 311742185                                        | -----A-M-LEPG-R--E--IE---V-D----- MAA-A RDA--Q-----      |
|                             | Rothia mucilaginosa          | 283458676                                        | -----TA--V--SDA--D--K--VE--Q--N-- L-Q-- KDA---IA----     |
|                             | Thermonospora curvata        | 269128045                                        | -----AL---S---R---A---E--K----- LAA-C AKA--K--T----      |
|                             | Gordonia bronchialis         | 262201618                                        | -----AL--GT-----S--K----- TGD-- SKA----T----             |
|                             | Clavibacter michiganensis    | 170781021                                        | -----TA---T---AD--R--IQ--Q----- --AA-S --A---T-----      |
|                             | Intrasporangium calvum       | 317126680                                        | -----LV-GSA--QD--R--E--K--D-- SAD-T RAA-IK-----          |
|                             | Xylanimonas cellulosilytica  | 269955562                                        | V-----A-----S-S--D--E--R--Q-I-S-- SE--- AAA-A---T----    |
|                             | Sanguibacter keddieii        | 269796075                                        | V-----A-----S---A---H-V-R--K-I-D-- TAA-- --A---T-----    |
|                             | Brevibacterium linens        | 260907101                                        | -----A--L--S---A--E--VR--Q----- LAD-- ANA-AT--T----      |
|                             | Saccharopolyspora erythraea  | 134101028                                        | --G--L--L-----RD--R--E--K----- LAD-A ARA--RLV-----       |
|                             | Leifsonia xyli               | 50955412                                         | -----TA--L--TD---D--A--IR--QL----- TAA-S RAS--D--T----   |
|                             | Jonesia denitrificans        | 256831934                                        | -----A---GSAD-V---E-V-R--K-I----- TGA-- ADA----T----     |
|                             | Nocardioidaceae bacterium    | 326332989                                        | --G--A--V--EP--R--E--R---I----- LAD-- AAA---V-----       |
|                             | Micrococcus luteus           | 289705986                                        | --G--A---GSAD---K-E--A--Q----- TAD-M A-H-I---T----       |
|                             | Conexibacter woesei          | 284046077                                        | --G--A---MSDS-----E--IA--QA--TE- LAD QSS-----T----       |
|                             | Mycobacterium tuberculosis   | 260184925                                        | -----TA--M--QP--AQ---C-----G-- T----- A-R-IA--T----      |
|                             | Cellulomonas flavigena       | 296130338                                        | -----TA--V-GTP--RD--E--R---V----- SRQ-A KDA--A-R-----    |
|                             | Geodermatophilus obscurus    | 284991328                                        | -----A--L--GEPA-R--E--A-----D-- LTA-S R-A-IN-V-----      |
|                             | Mobiluncus curtisii          | 315655719                                        | V-----AL--GTP-----M--VIQ--Q----- MA--C QAA-IDL-T----     |
|                             | Nakamurella multipartita     | 258650905                                        | -----A--M--DPS-T--AE--L--L----- I-S-- AQA--E--T----      |
|                             | Kitasatospora setae          | 311898457                                        | -----S-----R--E--K----- L-D-- --AS-----                  |
|                             | Saccharomonospora viridis    | 257055897                                        | -----A--L--QP--RT--EH--S--K----- L R-EN-G-V-----         |
|                             | Amycolatopsis mediterranei   | 300789378                                        | -----A--M--EP--A-----R--KL----- L A-PDI---T----          |
|                             | Pseudonocardia sp. P1        | 325002235                                        | -----A-RL-GTPA-A-----QLI-S-- L D-S--G-V-----             |
|                             | Rubrobacter xylanophilus     | 108803318                                        | -----ALR--HT-G-RA--RQ-VAN-KA---A- MQN-IE-V-----          |
|                             | Thermoanaerobacter wiegelii  | 307265278                                        | -----C--E-LSD---Y-K-IVEN-KA--NA- M-R-INLV-----           |
|                             | Clostridium thermocellum     | 125973573                                        | -----AEVLTDD---QY--QIVKN-KT--NA- M-K-IDLV-----           |
|                             | Nitrosomonas eutropha        | 114331539                                        | -----A--E--SPA--DY-QQVIEN--VM-RV- QQR-LRIV--H--          |
|                             | Burkholderia pseudomallei    | 76581166                                         | -----A--E-LSP---Y--KVVEN--V--QT- VKR-LRIV--R-E           |
|                             | Aquifex aeolicus             | 15605959                                         | -----A--E-MS-----YAKQVVEN--V--E- KKY-FKIVT----           |
|                             | Persephonella marina         | 225850656                                        | -----A--E-MT---R-YAHQ-VKN-KV--E- KAE-LRIV-----           |
|                             | Thermotoga maritima          | 15643483                                         | -----C--E-MT-----Y-QQVVKV-KKM--EF QKR-YRIV-----          |
|                             | Thermotoga petrophila        | 148269354                                        | -----C--E-MT-----Y-QQVVKV-KKM--EF QKR-YRIV-----          |
|                             | Fervidobacterium nodosum     | 154248784                                        | -----C--E-LSD---AY-NQIVKN-KA--KA- ENR-LRIV-----          |
|                             | Pelobacter propionicus       | 118580168                                        | -----A--E-LQP---QY--QVVNN--T---E- VKR-FKLT-----          |
|                             | Neorickettsia risticii       | 254796604                                        | ---R--A-GE-LTT---DYIRAVVRN-KT--NV- R-R-FD-----           |
|                             | Zymomonas mobilis            | 56552097                                         | -----A-GE-LQPS---YAKAVVEN-QA--A-- K-R-SDLVT----          |
|                             | Rhodopseudomonas palustris   | 90424158                                         | -----A--E-LQPD--VYAKNVVEN-KA---T- RGH-FDIV-----          |
|                             | Pseudomonas putida           | 303306209                                        | -----C--E-LEP---AY--QVIEN-QAM-KVF IDR-YD-V-----          |
|                             | Bacillus clausii             | 56965621                                         | -----A-GE-LSD---TYAKQIIAN-KR-G-K- QAE--DIV-----          |
|                             | Psychrobacter cryohalolentis | 93005149                                         | -----C--E-LE-N---TY--QVVKN-QAM-KVI QDR-YEII-----E        |
|                             | Thermus scotoductus          | 320451242                                        | --G--A-FE-LQP---YSRLVVEN-KR-G-E- AKR-YRLVT----           |
|                             | Fusobacterium mortiferum     | 237737799                                        | -----A--E-LTP--I-Y-QQIVKN-QT--KV- ENG-LRIV-----          |
| Thermodesulfo. yellowstonii | 206890824                    | -----A--E-LS-D---Y-KKVIKN-KT--A- KKK-FKLV-D---   |                                                          |
| Denitrovibrio acetiphilus   | 291287821                    | -----A--E-LSD---Y-QQIVKN-KT--KV- ADR-FRIV-----   |                                                          |
| Anaerobac. hydrogeniformans | 289522796                    | -----LT--L-MT---AYGAQVVKN--VM-DV- KNN-FDIV-----  |                                                          |
| Thermobaculum terrenum      | 269925153                    | -----AL-E-LQP---Y-RQIVKN-ST--QS- -KH-FNLV-----   |                                                          |
| Synechococcus sp. RS9916    | 116075611                    | -----A-GE-LTDD--AYSQVVAN-QA--KQI QAR-ID-V-----   |                                                          |
| Cyanobium sp. PCC 7001      | 254432489                    | -----A-GE-LQPS--RAYS-QVIAN-QA--A-I Q-R-ID-V----- |                                                          |
| Archaea                     | Methanosarcina mazei         | 21226544                                         | -----A--E-MS---RQD-DQ-VKN-KV-CSC- KQK-FDIV-----          |
|                             | Methanohalophilus mahii      | 294496562                                        | -----A--E-LSDK--QD-KQ-VKN-KA-CAN- IDRFDIVA----           |
|                             | Methanosaeta thermophila     | 116754542                                        | -----A--E-MTP--RRY-EQIVRN-AA--D-- I-N-FDLV-----          |



**Supplemental File 7: Presence or absence of various *Actinobacteria*-specific CSPs in different genera**

| Genus                    | ML0642 | ML1009 | ML1029 | ML1306 | ML0760 | ML0804 | ML0857 | ML0869 | ML1016 | ML1026 | ML2137 | ML2204 | ML0013 |
|--------------------------|--------|--------|--------|--------|--------|--------|--------|--------|--------|--------|--------|--------|--------|
| <i>Mycobacterium</i>     | +      | +      | +      | +      | +      | +      | +      | +      | +      | +      | +      | +      | +      |
| <i>Tsukamurella</i>      | +      | +      | +      | +      | +      | +      | +      | +      | +      | +      | +      | +      | +      |
| <i>Gordonia</i>          | +      | +      | +      | +      | +      | +      | +      | +      | +      | +      | +      | -      | +      |
| <i>Nocardia</i>          | +      | +      | +      | +      | +      | +      | +      | +      | +      | +      | +      | -      | +      |
| <i>Rhodococcus</i>       | +      | +      | +      | +      | +      | +      | +      | +      | +      | +      | +      | +      | +      |
| <i>Segniliparus</i>      | +      | +      | +      | +      | +      | +      | +      | +      | +      | +      | +      | +      | +      |
| <i>Amycolicococcus</i>   | +      | +      | +      | +      | +      | +      | +      | +      | +      | +      | +      | +      | +      |
| <i>Corynebacterium</i>   | +      | +      | +      | +      | +      | +      | +      | +      | +      | +      | +      | +      | +      |
| <i>Nakamurella</i>       | +      | +      | -      | +      | +      | +      | +      | +      | +      | +      | +      | +      | +      |
| <i>Pseudonocardia</i>    | +      | +      | +      | +      | +      | +      | +      | +      | +      | +      | +      | +      | +      |
| <i>Saccharopolyspora</i> | +      | +      | +      | +      | +      | +      | +      | +      | +      | +      | +      | -      | +      |
| <i>Actinosynnema</i>     | +      | +      | +      | +      | +      | +      | +      | +      | +      | +      | +      | +      | +      |
| <i>Saccharomonospora</i> | +      | +      | +      | +      | +      | +      | +      | +      | +      | +      | +      | +      | +      |
| <i>Amycolatopsis</i>     | +      | +      | +      | +      | +      | +      | +      | +      | +      | +      | +      | +      | +      |
| <i>Geodermatophilus</i>  | +      | +      | +      | +      | +      | +      | +      | +      | +      | +      | +      | +      | +      |
| <i>Stackebrandtia</i>    | +      | +      | +      | +      | +      | +      | +      | +      | +      | +      | +      | +      | +      |
| <i>Verrucosispora</i>    | +      | +      | +      | +      | +      | -      | +      | +      | +      | -      | +      | -      | +      |
| <i>Micromonospora</i>    | +      | +      | +      | +      | +      | +      | +      | +      | +      | +      | +      | +      | +      |
| <i>Salinispora</i>       | +      | +      | +      | +      | +      | +      | +      | +      | +      | +      | +      | +      | +      |
| <i>Frankia</i>           | +      | +      | +      | +      | +      | +      | +      | +      | +      | +      | +      | +      | +      |
| <i>Acidothermus</i>      | +      | +      | +      | +      | +      | +      | +      | +      | +      | +      | +      | +      | +      |
| <i>Streptosporangium</i> | +      | +      | +      | +      | +      | +      | +      | +      | +      | +      | +      | +      | +      |
| <i>Thermomonospora</i>   | +      | +      | +      | +      | +      | +      | +      | +      | +      | +      | +      | -      | +      |
| <i>Thermobifida</i>      | +      | +      | +      | +      | +      | +      | +      | +      | +      | +      | +      | +      | -      |
| <i>Nocardiopsis</i>      | +      | +      | +      | +      | +      | +      | +      | +      | +      | +      | +      | +      | +      |
| <i>Catenulispora</i>     | +      | +      | +      | +      | +      | +      | +      | +      | +      | +      | +      | +      | +      |
| <i>Streptomyces</i>      | +      | +      | +      | +      | +      | +      | +      | +      | +      | +      | +      | +      | +      |
| <i>Propionibacterium</i> | +      | +      | +      | +      | +      | +      | +      | +      | +      | +      | +      | +      | +      |
| <i>Kribbella</i>         | +      | +      | +      | +      | +      | +      | +      | +      | +      | +      | +      | +      | +      |
| <i>Nocardioides</i>      | +      | +      | +      | +      | +      | +      | +      | +      | +      | +      | +      | +      | +      |
| <i>Kineococcus</i>       | +      | +      | +      | +      | +      | +      | +      | +      | +      | +      | +      | +      | +      |
| <i>Janibacter</i>        | +      | +      | +      | +      | +      | +      | +      | +      | +      | +      | +      | +      | +      |
| <i>Kytococcus</i>        | +      | +      | +      | +      | +      | +      | +      | +      | +      | +      | +      | +      | +      |
| <i>Brachybacterium</i>   | +      | +      | +      | +      | +      | +      | +      | +      | +      | +      | +      | +      | -      |
| <i>Brevibacterium</i>    | +      | +      | +      | +      | +      | +      | +      | +      | +      | -      | +      | +      | +      |
| <i>Intrasporangium</i>   | +      | +      | +      | +      | +      | +      | +      | +      | +      | +      | +      | +      | +      |
| <i>Isoperitcola</i>      | +      | +      | +      | +      | +      | +      | +      | +      | +      | +      | +      | +      | +      |
| <i>Microbacterium</i>    | +      | +      | +      | +      | +      | +      | +      | +      | +      | +      | +      | +      | +      |
| <i>Rothia</i>            | +      | +      | +      | +      | +      | +      | +      | +      | +      | +      | +      | +      | -      |
| <i>Kocuria</i>           | +      | +      | +      | +      | +      | +      | +      | +      | +      | +      | +      | +      | +      |
| <i>Micrococcus</i>       | +      | +      | +      | +      | +      | +      | +      | +      | +      | +      | +      | +      | +      |
| <i>Renibacterium</i>     | +      | +      | +      | +      | +      | +      | +      | +      | +      | +      | +      | +      | +      |
| <i>Arthrobacter</i>      | +      | +      | +      | +      | +      | +      | +      | +      | +      | +      | +      | +      | +      |
| <i>Beutenbergia</i>      | +      | +      | +      | +      | +      | +      | +      | +      | +      | +      | +      | +      | +      |
| <i>Cellulomonas</i>      | +      | +      | +      | +      | +      | +      | +      | +      | +      | +      | -      | +      | +      |
| <i>Xylanimonas</i>       | +      | +      | +      | +      | +      | +      | +      | +      | +      | +      | +      | +      | +      |
| <i>Jonesia</i>           | +      | +      | +      | +      | +      | +      | +      | +      | +      | +      | +      | +      | +      |
| <i>Sanguibacter</i>      | +      | +      | +      | +      | +      | +      | +      | +      | +      | +      | +      | +      | +      |
| <i>Mobiluncus</i>        | +      | +      | +      | +      | +      | +      | +      | +      | +      | +      | +      | +      | +      |
| <i>Actinomyces</i>       | +      | +      | +      | +      | +      | +      | +      | +      | +      | +      | +      | +      | +      |
| <i>Arcanobacterium</i>   | +      | +      | +      | -      | +      | +      | +      | -      | +      | +      | +      | +      | -      |
| <i>Gardnerella</i>       | +      | -      | +      | -      | +      | +      | +      | +      | +      | +      | +      | +      | +      |
| <i>Bifidobacterium</i>   | +      | +      | +      | +      | +      | +      | +      | +      | +      | +      | +      | +      | +      |
| <i>Tropheryma</i>        | +      | +      | +      | +      | +      | +      | +      | +      | +      | +      | +      | +      | +      |
| <i>Leifsonia</i>         | +      | +      | +      | +      | +      | +      | +      | +      | +      | +      | +      | +      | +      |
| <i>Clavibacter</i>       | +      | +      | +      | +      | +      | +      | +      | +      | +      | +      | +      | +      | +      |
| <i>marine actino*</i>    | +      | +      | +      | +      | +      | +      | +      | +      | +      | +      | +      | +      | +      |
| <i>Acidimicrobium</i>    | -      | +      | -      | +      | +      | +      | -      | -      | -      | -      | -      | -      | -      |
| <i>Conexibacter</i>      | +      | +      | -      | +      | -      | -      | -      | -      | -      | -      | -      | -      | -      |
| <i>Rubroacter</i>        | +      | +      | +      | +      | -      | -      | -      | -      | -      | -      | -      | -      | -      |
| <i>Olsenella</i>         | -      | -      | -      | -      | -      | -      | -      | -      | -      | -      | -      | -      | -      |
| <i>Slackia</i>           | -      | -      | -      | -      | -      | -      | -      | -      | -      | -      | -      | -      | -      |
| <i>Eggerthella</i>       | -      | -      | -      | -      | -      | -      | -      | -      | -      | -      | -      | -      | -      |
| <i>Cryptobacterium</i>   | -      | -      | -      | -      | -      | -      | -      | -      | -      | -      | -      | -      | -      |
| <i>Coriobacterium</i>    | -      | -      | -      | -      | -      | -      | -      | -      | -      | -      | -      | -      | -      |

**Notes:** The left column lists all currently genome sequenced actinobacterial genera. +: present; -: absent. \*: marine actinobacterium PHSC20C1.



### Supplemental File 8

Partial sequence alignment of the protein Alpha keotglutarate decarboxylase showing a 1 aa deletion that is uniquely present in various *Corynebacteriales* species but not found in any other actinobacteria. Sequence information is shown here for a only limited number of species; The dashes (-) in the sequence alignments indicate identity with the amino acid on the top line.

|  |                              | 360       |                     | 397                 |
|--|------------------------------|-----------|---------------------|---------------------|
|  | Segniliparus rotundus        | 296393143 | GAESGDFLRTIHELLISDA | FYDEIYAALRIPYEPiRW  |
|  | Gordonia bronchialis         | 262201823 | -----LD--           | ----FT-FH----V--    |
|  | Tsakamurella paurometabola   | 296138938 | -----YV--TL--E      | -W-D-FRT-HV---V--   |
|  | Nocardia farcinica           | 161598437 | -----Q-----E        | ----FHG-GV---V--    |
|  | Mycobacterium avium          | 41408634  | -----M-L--G         | -W-D-FRE-S---L----  |
|  | Mycobacterium leprae         | 221230016 | -----MVL--S         | -W--FRE-S---L-V--   |
|  | Mycobacterium tuberculosis   | 215403087 | -----L--G           | -W--VFRE-S---L-V--  |
|  | Rhodococcus opacus           | 226365480 | -----K-----E        | ----FHS-H----V--    |
|  | Rhodococcus jostii           | 111022975 | -----N-----E        | ----FH--H----V--    |
|  | Rhodococcus equi             | 296039173 | -----N-----E        | ----VFHS-H----V--   |
|  | Corynebacterium efficiens    | 25027746  | ----E---MSQ--VD--   | -W-H-FEEMNV--T-M--  |
|  | Corynebacterium jeikeium     | 260577589 | ----E---MSR---N-E   | -W--FH-M-V--A-T--   |
|  | Corynebacterium diphtheriae  | 161598675 | ----E---MSQ-F-D--   | -W--FESIG---A-M--   |
|  | Corynebacterium striatum     | 227503791 | ----E---LGQ-IVD-R   | -W--LFESMGV--Q-F--  |
|  | Stackebrandtia nassauensis   | 291302596 | --Q--E--KRV---LGAD  | G--F-DVFTS--V---V-- |
|  | Saccharopolyspora erythraea  | 134102819 | -----V-Q--LGEN      | G---D-FTS-----V--   |
|  | Nakamurella multipartita     | 258651662 | ----E--R--Q---GED   | Q---DVF-S--L---V--  |
|  | Actinosynnema mirum          | 256380243 | ----E--KRV-Q--LGED  | G---DVFTS--L-----   |
|  | Micromonospora aurantiaca    | 270502237 | --Q--E--KVM---LGER  | G---D-FTS-----V--   |
|  | Salinispora arenicola        | 159039598 | --Q--E--KVM---LGEH  | G---Q-FTS-----V--   |
|  | Leifsonia xyli               | 50955456  | -G--E--KIV---TGKR   | S--EN-F-E---A--Q-   |
|  | Clavibacter michiganensis    | 170782429 | --G--E--KIV--R--GQH | G--ED-F-----D--Q-   |
|  | Arthrobacter aurescens       | 119963962 | --G--E--KLV-Q--LGAQ | N----FE-----V--     |
|  | Micrococcus luteus           | 289706398 | --G--E--KIV-G--LGED | G----VFHS-----V--   |
|  | Propionibacterium acnes      | 295130820 | --Q--E--RM-Q--LGAQ  | R--ED-FES-----A-VQ- |
|  | Kytococcus sedentarius       | 256825652 | --A--E--KLV-GY-NGED | G----FQS-----V--    |
|  | Catenulispora acidiphila     | 256396666 | --Q-----I--Q--LGED  | G---KLFES-----V--   |
|  | Streptomyces coelicolor      | 21223647  | --A--E--QVAN--LGEN  | G---D-FK-----V--    |
|  | Frankia sp. EUN1f            | 288917901 | --Q--EY--R--Q--LGAQ | G----F-S--V--V----  |
|  | Thermobifida fusca           | 72160970  | ----E--R--Q--LGED   | G----FES-----V--    |
|  | Streptosporangium roseum     | 271969479 | --Q-----QV-R--LGED  | G----FE-----V--     |
|  | Actinomyces coleocanis       | 227495004 | -G--EL--AVANK-TGQD  | G--ERVFDMSKV--S-YE- |
|  | Acidimicrobium ferrooxidans  | 256372497 | ----Q--A--AA--EGEQ  | D----FS--QV--P-M--  |
|  | Arcanobacterium haemolyticum | 297570946 | --T--R--LMEHK-LGLD  | G--ER--I--HV--K-FV- |

*Corynebacteriales*

Other  
*Actinobacteria*

Supplemental File 9

A conserved insert in the Chromosome segregation DNA-binding protein ParB that is largely specific for the *Corynebacteriales*. This insert is lacking in some of the *Corynebacterium* species, which form a distinct clade within this genus (see Supplemental file 11)

|                                       |                                       | 387                                 | 427                    |
|---------------------------------------|---------------------------------------|-------------------------------------|------------------------|
| <i>Corynebacteriales</i>              | <i>Corynebacterium jeikeium</i>       | 68537193                            | RRVGAGVLSAGHARALLGLK S |
|                                       | <i>Corynebacterium diphtheriae</i>    | 38234909                            | -K-A-----V- A          |
|                                       | <i>Corynebacterium genitalium</i>     | 300780165                           | --A-----V- V           |
|                                       | <i>Corynebacterium matruchotii</i>    | 225020855                           | QK-A-----AIN E         |
|                                       | <i>Corynebacterium glutamicum</i>     | 145297088                           | TK-A-----A A           |
|                                       | <i>Corynebacterium efficiens</i>      | 259508322                           | TK-A-----I- G          |
|                                       | <i>Tsukamurella paurometabola</i>     | 296141900                           | --A-----A-E G          |
|                                       | <i>Gordonia bronchialis</i>           | 262204655                           | --A-----S-E T          |
|                                       | <i>Mycobacterium avium</i>            | 15808976                            | --A-----S-E A          |
|                                       | <i>Mycobacterium kansasii</i>         | 240168401                           | --A-----S-E A          |
|                                       | <i>Mycobacterium gilvum</i>           | 145221429                           | --A-----S-D G          |
|                                       | <i>Mycobacterium tuberculosis</i>     | 219555764                           | --A-----S-E A          |
|                                       | <i>Mycobacterium marinum</i>          | 183985451                           | --A-----S-E A          |
|                                       | <i>Rhodococcus opacus</i>             | 226362886                           | --A-----S-E A          |
|                                       | <i>Rhodococcus jostii</i>             | 111020643                           | --A-----S-E A          |
|                                       | <i>Rhodococcus erythropolis</i>       | 226309509                           | --A-----S-E A          |
|                                       | <i>Rhodococcus equi</i>               | 296038613                           | --A-----S-E A          |
|                                       | <i>Segniliparus rotundus</i>          | 296395439                           | -K-A-----D G           |
|                                       | <i>Nocardia farcinica</i>             | 54027640                            | --A-----E A            |
|                                       | <i>Corynebacterium</i> subclade       | <i>Corynebacterium ammoniagenes</i> | 296118597              |
| <i>Coryne. pseudogenitalium</i>       |                                       | 227490380                           | K-A--T-----S-D         |
| <i>Coryne. tuberculostearicum</i>     |                                       | 255324014                           | K-A--T-----S-D         |
| <i>Corynebacterium aurimucosum</i>    |                                       | 227834356                           | K-A--T--G-----P        |
| <i>Corynebacterium accolens</i>       |                                       | 227502234                           | K-A--T-----I--D        |
| <i>Corynebacterium striatum</i>       |                                       | 227506194                           | K-A--T--G-----I--P     |
| <i>Coryne. glucuronolyticum</i>       |                                       | 227487670                           | -K-A-R-I-S----I--A     |
| <i>Leifsonia xyli</i>                 |                                       | 50955949                            | T-A-----I-S-G D        |
| <i>Kytococcus sedentarius</i>         |                                       | 256826451                           | --A-----E              |
| <i>Kineococcus radiotolerans</i>      |                                       | 152968445                           | --A--I-----S-E         |
| <i>Janibacter sp.</i>                 |                                       | 84497202                            | --A-----VS             |
| <i>Beutenbergia cavernae</i>          |                                       | 229822691                           | --A-----S              |
| <i>Actinomyces urogenitalis</i>       |                                       | 227496613                           | --A-----P              |
| <i>Mobiluncus curtisii</i>            |                                       | 298345824                           | Q-A-----A-D            |
| <i>Renibacterium salmoninarum</i>     |                                       | 163842269                           | --A-----S-P            |
| Other <i>Actinobacteria</i>           | <i>Brevibacterium mcbrellneri</i>     | 295394854                           | --A----Q-----N         |
|                                       | <i>Kocuria rhizophila</i>             | 184201996                           | --A-----S-----A-T      |
|                                       | <i>Micrococcus luteus</i>             | 289706709                           | --A--T-----T           |
|                                       | <i>Kribbella flavida</i>              | 284034932                           | --A-----P              |
|                                       | <i>Sanguibacter keddieii</i>          | 269797060                           | --A-----P              |
|                                       | <i>Cellulomonas flavigena</i>         | 296131536                           | --A-----G              |
|                                       | <i>Xylanimonas cellulolytica</i>      | 269958140                           | --A--I-----S-S         |
|                                       | <i>Jonesia denitrificans</i>          | 256833759                           | --A-----S              |
|                                       | <i>Propionibacterium freudenreich</i> | 297627566                           | --A-A-----A-D          |
|                                       | <i>Actinosynnema mirum</i>            | 256381068                           | --A-----D              |
|                                       | <i>Frankia sp. Eu11c</i>              | 280960972                           | --A-----A-E            |
|                                       | <i>Frankia sp. EAN1pec</i>            | 158319049                           | --A-----S-E            |
|                                       | <i>Amycolatopsis mediterranei</i>     | 300791158                           | --A-----S-E            |
|                                       | <i>Bifidobacterium longum</i>         | 46190724                            | K-A-----S-----S        |
|                                       | <i>Bifidobacterium bifidum</i>        | 224283944                           | KK-A-----N             |
|                                       | <i>Gardnerella vaginalis</i>          | 297243212                           | KH-AS-----E            |
|                                       | <i>Parascardovia denticolor</i>       | 294786227                           | KK-AS-----A-P          |
|                                       | <i>Streptomyces coelicolor</i>        | 6539744                             | N-A-----SVD            |
|                                       | <i>Brachybacterium faecium</i>        | 257070284                           | --LAS-AI-----S-D       |
|                                       | <i>Acidothermus cellulolyticus</i>    | 117929361                           | -K-A--T-----A-N        |
|                                       | <i>Rothia dentocariosa</i>            | 296934401                           | --A--IA-----T-T        |
|                                       | <i>Nakamurella multipartita</i>       | 258655503                           | --A-----S-P            |
|                                       | <i>Saccharopolyspora erythraea</i>    | 134103810                           | --A-----S-D            |
|                                       | <i>Saccharomonospora viridis</i>      | 257057909                           | --A-----S-D            |
|                                       | <i>Salinispora tropica</i>            | 145597095                           | --A-----S-D            |
| <i>Geodermatophilus obscurus</i>      | 284993432                             | T-A--II-----P                       |                        |
| <i>Thermomonospora curvata</i>        | 269129159                             | --A--T-----S-D                      |                        |
| <i>Nocardioopsis dassonvillei</i>     | 297563776                             | T-A-----T--KVE                      |                        |
| <i>Thermobifida fusca</i>             | 72163509                              | -K-A-R-I-----AVE                    |                        |
| <i>Nocardiooides sp.</i>              | 119718910                             | --A-----S--AIE                      |                        |
| <i>Aeromicrobium marinum</i>          | 293168377                             | --A-----VTVA                        |                        |
| <i>Arthrobacter aurescens</i>         | 119962086                             | --A-----A-P                         |                        |
| <i>Clavibacter michiganensis subs</i> | 148274155                             | H-A-----I-SSG                       |                        |
| <i>Arcanobacterium haemolyticum</i>   | 297572336                             | --A-----A                           |                        |
|                                       |                                       |                                     | GPTEEQLRATRVVSEGLSVR   |
|                                       |                                       |                                     | -EDT-AE--Q-IIA-----    |
|                                       |                                       |                                     | --A--Q--D-I-A-----     |
|                                       |                                       |                                     | DQ-G-----N-I-----      |
|                                       |                                       |                                     | -EDA-DT-----IIA-----   |
|                                       |                                       |                                     | -E-A-DA--S-IIA-----    |
|                                       |                                       |                                     | -T-A--A--A-IIA--M---   |
|                                       |                                       |                                     | -SDA--A--A-I-A--M---   |
|                                       |                                       |                                     | --A--E--S-I-A-----     |
|                                       |                                       |                                     | --A--E--S-I-A-----     |
|                                       |                                       |                                     | --V--E--A-I-A-----     |
|                                       |                                       |                                     | --A--E--S-I-A-----     |
|                                       |                                       |                                     | --A--E--S-I-A-----     |
|                                       |                                       |                                     | -ADA--VM-A-I-A--M---   |
|                                       |                                       |                                     | -ADA--VM-A-I-A--M---   |
|                                       |                                       |                                     | -ADA--VM-A-I-A--M---   |
|                                       |                                       |                                     | -ADA--V--A-I-A--M---   |
|                                       |                                       |                                     | HT-A--D--S-IIA-----    |
|                                       |                                       |                                     | --DA--A--A-I-A--M---   |
|                                       |                                       |                                     | --A-----S-I-A-----     |
|                                       |                                       |                                     | DKDVMK--S-I-A-----     |
|                                       |                                       |                                     | DT-AM-YI-N-IIA-----    |
|                                       |                                       |                                     | DT-AM-YI-N-IIA-----    |
|                                       |                                       |                                     | DA-AM-LI-N-I-A-----    |
|                                       |                                       |                                     | DK-AMDYI-D--I-----     |
|                                       |                                       |                                     | DS-AM-IV-N--IA-----    |
|                                       |                                       |                                     | DKGQA-A-----A-----     |
|                                       |                                       |                                     | DQKGMVH--DKI-N-D----   |
|                                       |                                       |                                     | DGAAM--M-Q--A--M---    |
|                                       |                                       |                                     | DGAAM----Q-I-A-----    |
|                                       |                                       |                                     | DNAAM----Q-I-A-----    |
|                                       |                                       |                                     | DGAAM----Q-I-A-----    |
|                                       |                                       |                                     | DAAAM----Q-I-A-----    |
|                                       |                                       |                                     | D--AMTQ--Q-I-A-----    |
|                                       |                                       |                                     | DSAAI----Q-I-A--M---   |
|                                       |                                       |                                     | D-AQM-E--Q-I-A-----    |
|                                       |                                       |                                     | D-ADM----Q-I-A-----    |
|                                       |                                       |                                     | D-SDM----Q-I-Q-----    |
|                                       |                                       |                                     | SGDAI----Q-I-A-----    |
|                                       |                                       |                                     | DGAQI----Q-I-A-----    |
|                                       |                                       |                                     | DGAAI----Q-I-----      |
|                                       |                                       |                                     | DGA-I----Q-I-----      |
|                                       |                                       |                                     | QTADM-K--Q-I-----      |
|                                       |                                       |                                     | D-LA-----Q-I-A-----    |
|                                       |                                       |                                     | D-GA--D--I-A--M---     |
|                                       |                                       |                                     | DT-A-D-----I-A-----    |
|                                       |                                       |                                     | D-DA-D-----I-A-----    |
|                                       |                                       |                                     | DA-S--E--A-I-A--M---   |
|                                       |                                       |                                     | D--MDK--S-IIA-----     |
|                                       |                                       |                                     | DES-IDK---IIG-----     |
|                                       |                                       |                                     | N--DM-S--K-IIA-----    |
|                                       |                                       |                                     | SA-QM-S--K--A-----     |
|                                       |                                       |                                     | D--D--H-I-A-----       |
|                                       |                                       |                                     | D-ALM-E--Q-I-Q-----    |
|                                       |                                       |                                     | DATA--E--Q-I-A-----    |
|                                       |                                       |                                     | DQAKI-TI-QKI-N-----    |
|                                       |                                       |                                     | D-DD--Q--A-I-A-----    |
|                                       |                                       |                                     | E-GG--E--S-I-A-----    |
|                                       |                                       |                                     | D-DQ--E--G-I-A-----    |
|                                       |                                       |                                     | D--A-----H-I-A-----    |
|                                       |                                       |                                     | DAGK--A--A-I-A--M---   |
|                                       |                                       |                                     | S--A--A--H-I-A-----    |
|                                       |                                       |                                     | D-DL-D--A--E--I---     |
|                                       |                                       |                                     | D--L-DH--H-IIT-----    |
|                                       |                                       |                                     | D--L-D--Q--A--I---     |
|                                       |                                       |                                     | N--I-----A-----        |
|                                       |                                       |                                     | DAAAM--M-QKI-A--M---   |
|                                       |                                       |                                     | DD-AMRH--EKI-N-D----   |
|                                       |                                       |                                     | DAAAM----Q-I-A-N----   |

## Supplemental File 10

A neighbor-joining distance tree for *Corynebacteriales* species based upon ParB sequences. Some of the *Corynebacterium* species that lack the insert in this protein (Sup. File 9) form a distinct clade in this tree indicating that the insert-containing gene within this clade was replaced within an insert-lacking gene or this insert was lost from the gene.

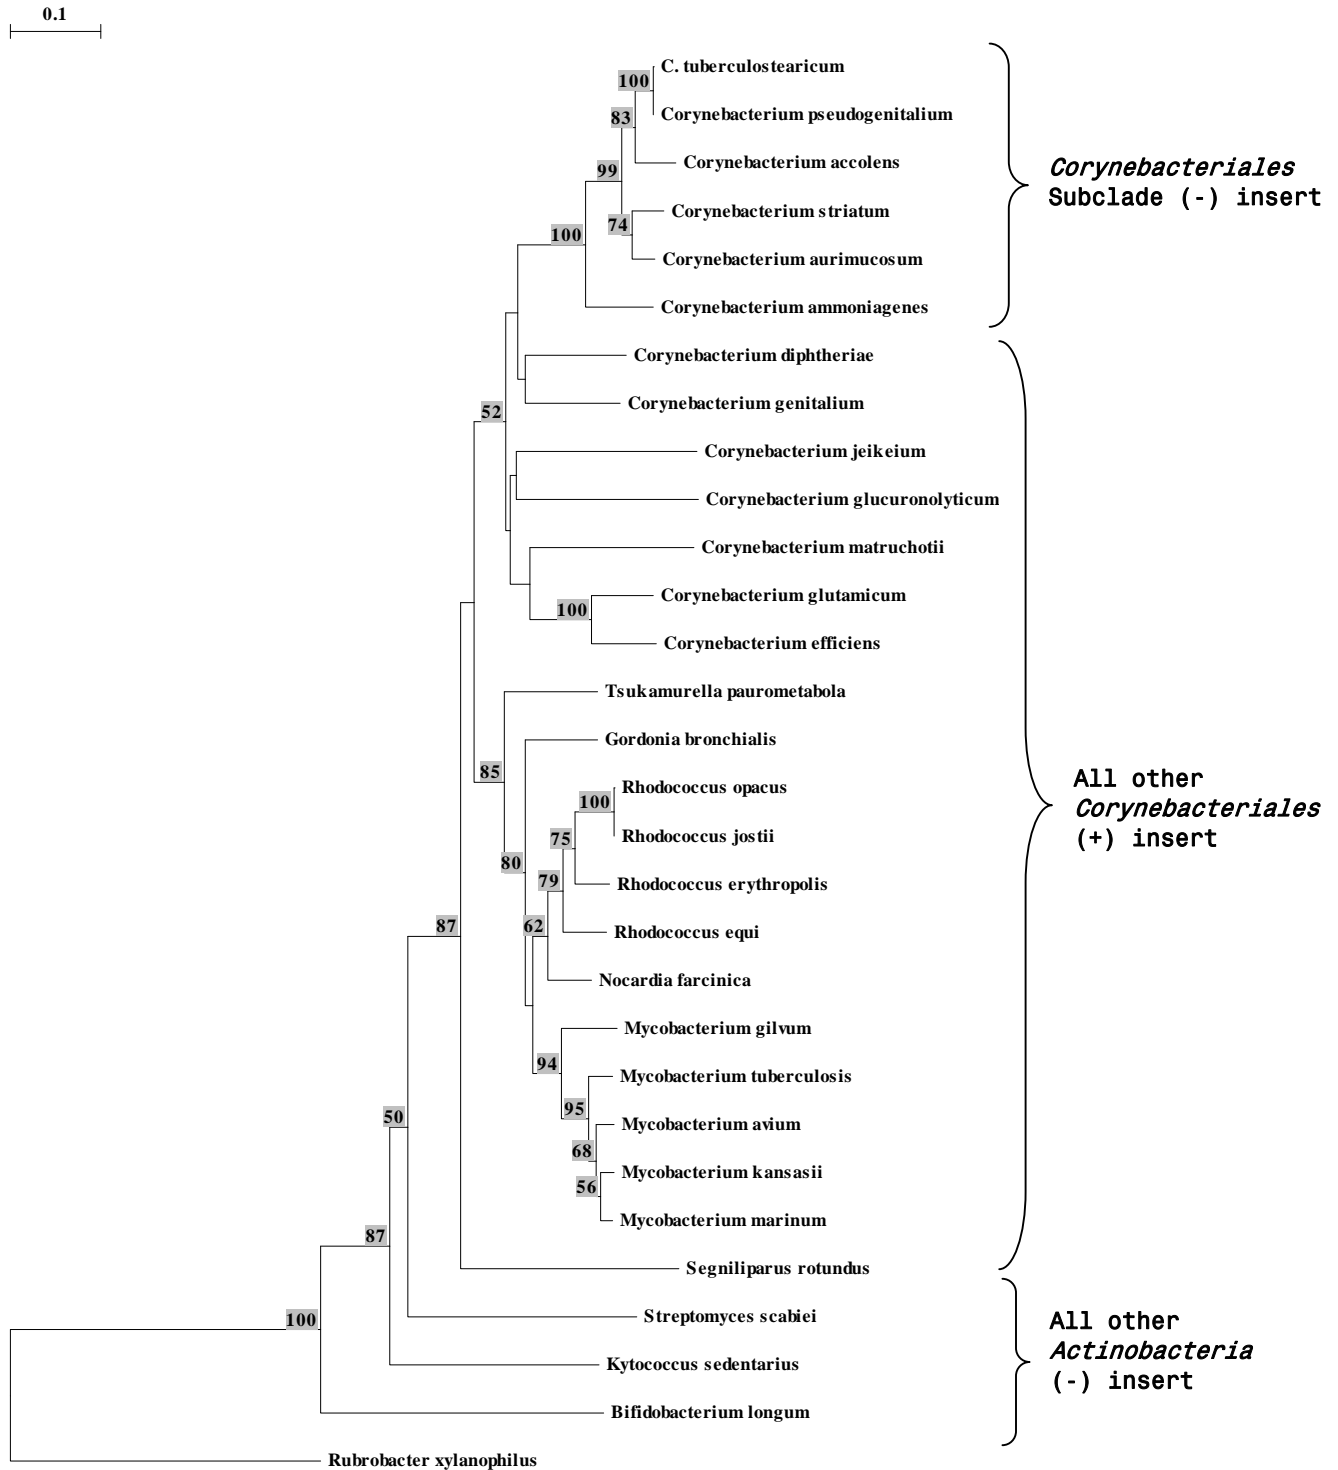

## Supplemental File 11

Partial sequence alignment of the protein Orotidine-5'-phosphate decarboxylase showing a 1 aa deletion in conserved regions that is unique to various *Mycobacterium* species but not found in any other actinobacteria.

|                                    |                                     | 41                                  | 72                                  |
|------------------------------------|-------------------------------------|-------------------------------------|-------------------------------------|
| <i>Mycobacterium</i>               | <i>Mycobacterium smegmatis</i>      | 118470834                           | LRAFCDICVAAFAGFA IVKPQVAFFEAYGSAG   |
|                                    | <i>Mycobacterium abscessus</i>      | 169629910                           | -AR-S---E---DV- -SH-A--             |
|                                    | <i>Mycobacterium intracellulare</i> | 254818277                           | -A-----IE--S--- V-----A--           |
|                                    | <i>Mycobacterium gilvum</i>         | 145224324                           | -SR-A-L--T----- V-----              |
|                                    | <i>Mycobacterium avium</i>          | 118466105                           | -A-----E----- V-----A--             |
|                                    | <i>Mycobacterium leprae</i>         | 15827193                            | -A-----E--S--- -A--                 |
|                                    | <i>Mycobacterium intracellulare</i> | 254818277                           | -A-----IE--S--- V-----A--           |
|                                    | <i>Mycobacterium kansasii</i>       | 240170761                           | -A-----Q-Y---- V-----A--            |
|                                    | <i>Mycobacterium ulcerans</i>       | 118617401                           | -A----- -A--                        |
|                                    | <i>Mycobacterium marinum</i>        | 183982213                           | -A----- V-----A--                   |
|                                    | <i>Mycobacterium vanbaalenii</i>    | 120403649                           | -AG-S----- V-----                   |
|                                    | <i>Rhodococcus equi</i>             | 296035881                           | -EQ-SE---E--V-QV A L-----G-         |
|                                    | <i>Nocardia farcinica</i>           | 54025588                            | -ER-AE---E--D-TV A L-----V----      |
|                                    | Other<br><i>Actinobacteria</i>      | <i>Corynebacterium striatum</i>     | 227504411                           |
| <i>Corynebacterium diphtheriae</i> |                                     | 38233916                            | -QR-TE---E--S-NV A L-----Y--W-A--   |
| <i>Corynebacterium jeikeium</i>    |                                     | 260578793                           | -EE-SKT--E---DV- C V-----Y-QF----   |
| <i>Tsukamurella paurometabola</i>  |                                     | 296140279                           | V--GLR-AE---EV G F-----QF-A--       |
| <i>Gordonia bronchialis</i>        |                                     | 262202269                           | --R-AET-TE-LGPV- A VI-----F----     |
| <i>Salinispora tropica</i>         |                                     | 145594402                           | -ER-AGTV-E-LGDRV A V---S---RF--R-   |
| <i>Micromonospora aurantiaca</i>   |                                     | 270501558                           | -ER--ATV-E-IGDRV A V---S---RF-AR-   |
| <i>Saccharopolyspora erythraea</i> |                                     | 134098655                           | -ER-ALTA-E-L--EV A VL---S---V-----  |
| <i>Saccharomonospora viridis</i>   |                                     | 257055590                           | -ER-ALTATE-L--TV A VL---S---A--     |
| <i>Actinosynnema mirum</i>         |                                     | 256379247                           | -ER-ALT--E--GAE- A V---S---H--R-    |
| <i>Nakamurella multipartita</i>    |                                     | 258654393                           | -ER-AMTV-E-LGPTV A VL---S---H-A--   |
| <i>Gardnerella vaginalis</i>       |                                     | 297533045                           | AEL-SMRMLQ-MN-R- A A--F-SSM--R--K-  |
| <i>Clavibacter michiganensis</i>   |                                     | 148272963                           | -EE-GLRV-E-T--R- G -----RH----      |
| <i>Bifidobacterium longum</i>      |                                     | 296454535                           | AEL-SMRMLQ-AN-R- A A--F-TSM--R--AK- |
| <i>Leifsonia xyli</i>              |                                     | 50954779                            | V-E-GLRV-D-A--R- G T-----RF-A--     |
| <i>Beutenbergia cavernae</i>       | 229820530                           | V-E-SLRV-E-LG-RV A VF---S--Y-RH---- |                                     |

## Supplemental File 12

Partial sequence alignment of the protein Acyl-CoA-carboxylase showing a 1 aa deletion in a conserved region that is uniquely found in *Rhodococcus-Nocardia* species.

|                                       |                             | 318       | 346                            |
|---------------------------------------|-----------------------------|-----------|--------------------------------|
| <i>Rhodococcus</i><br><i>Nocardia</i> | Rhodococcus erythropolis    | 229489553 | GYYGAGTVEYLVQGD TISFLEVNTRLQVE |
|                                       | Rhodococcus jostii          | 111023245 | ----- -V-----                  |
|                                       | Rhodococcus opacus          | 226365754 | ----- -V-----                  |
|                                       | Rhodococcus equi            | 296037236 | ----- -V-----                  |
|                                       | Nocardia farcinica          | 54022956  | -----E -V-----                 |
| <i>Other</i><br><i>Actinobacteria</i> | Corynebacterium jeikeium    | 68536759  | -----GS- G L-----              |
|                                       | Corynebacterium striatum    | 227505378 | -----GS- G L-----              |
|                                       | Corynebacterium diphtheriae | 38233256  | -----GS- G L-----              |
|                                       | Mycobacterium leprae        | 581342    | -----GQ- G L-----              |
|                                       | Mycobacterium tuberculosis  | 260206637 | -H-----GQ- G L-----            |
|                                       | Gordonia bronchialis        | 262201773 | -----F--GS- G LV-----          |
|                                       | Segniliparus rotundus       | 296392950 | --H-----GE- G LV-----          |
|                                       | Tsukamurella paurometabola  | 296138760 | -----F--AA- G LV-----          |
|                                       | Micromonospora aurantiaca   | 270503371 | --H-----GV- G -----            |
|                                       | Salinispora tropica         | 145593407 | --H-----GV- G -----            |
|                                       | Saccharomonospora viridis   | 257054651 | --S-----GS- G -----            |
|                                       | Actinosynnema mirum         | 256380383 | --H-----GV- G -----            |
|                                       | Stackebrandtia nassauensis  | 291298309 | -H-----F--GA- G -----          |
|                                       | Nakamurella multipartita    | 258654355 | --H-----F--GE- G SV-----       |
|                                       | Thermobispora bispora       | 296268677 | --V----C-F--GQ- G -----        |
|                                       | Micrococcus luteus          | 289707027 | --T-----AP- G L-----           |
|                                       | Propionibacterium acnes     | 50843179  | --V--A-C-F--GR- G -----        |
|                                       | Streptomyces coelicolor     | 4731924   | --V-----F--GM- G -----         |
|                                       | Frankia alni                | 111220670 | --V-----F--AR- G M-----        |

### Supplemental File 13

A conserved insert in the protein BlinB\_00480 of unknown function  
that is specific for the genus *Rhodococcus*.

|                                       |                                     | 111             |                  | 142                |
|---------------------------------------|-------------------------------------|-----------------|------------------|--------------------|
| <i>Rhodococcus</i>                    | <i>Rhodococcus jostii</i>           | 111024124       | LVRRFEEQVRRSHPLS | GGG AEGTLSEGIAAERD |
|                                       | <i>Rhodococcus opacus</i>           | 226366364       | -----            | GGG -----          |
|                                       | <i>Rhodococcus equi</i>             | 296035850       | -I---H-----Q     | SDS K-----A        |
|                                       | <i>Rhodococcus erythropolis</i>     | 226306513       | -I-----Q         | NDG ID-----R       |
|                                       | <i>Brevibacterium linens</i>        | 260903777       | -----ST--P--Q    | G---L---EG--S      |
|                                       | <i>Leifsonia xyli</i>               | 50954814        | -----P--Q        | GN---LD--T--A      |
|                                       | <i>Janibacter sp.</i>               | 84496558        | -----S--P--Q     | G--R-LD--QH--E     |
|                                       | <i>Xylanimonas cellulositytica</i>  | 269956344       | -----A--P--Q     | GD-RILD--D--R      |
|                                       | <i>Jonesia denitrificans</i>        | 256832485       | -----P--Q        | GD-RILD--TI--S     |
|                                       | <i>Streptomyces svicens</i>         | 297198889       | -----S--P--Q     | GD-RIVD--D--E      |
|                                       | <i>Streptomyces avermitilis</i>     | 29832834        | -----S--P--Q     | GD-RIVD--D--E      |
|                                       | <i>Streptomyces albus</i>           | 239978850       | -----S--P--Q     | GD-RIVD-----       |
|                                       | <i>Thermobispora bispora</i>        | 296269969       | -----DS--P--Q    | GD-R-VD--NR--G     |
|                                       | <i>Saccharopolyspora erythraea</i>  | 134098709       | -I-----G--Q      | G--R-LD--QH--S     |
|                                       | <i>Actinosynnema mirum</i>          | 256379212       | -I---S--G--MQ    | -D-R-AD--E--V      |
|                                       | <i>Actinomyces urogenitalis</i>     | 227496079       | -I---SS--P--Q    | GT--ILD--H--T      |
|                                       | <i>Mobiluncus mulieris</i>          | 227875311       | ---Y---P--Q      | GK-RILD--Q--G      |
|                                       | <i>Kytococcus sedentarius</i>       | 256825144       | -----S--P--VQ    | GT-R-LD--RT--R     |
|                                       | <i>Beutenbergia cavernae</i>        | 229820662       | -----P--Q        | GD-RILD--E--R      |
|                                       | <i>Arcanobacterium haemolyticum</i> | 297571458       | --Q-Y-S--P--Q    | GD-R-LD--Q--E      |
|                                       | <i>Streptosporangium roseum</i>     | 271967321       | -----N--P--Q     | G--R-VD--R--G      |
|                                       | <i>Thermomonospora curvata</i>      | 269126429       | -----A--P--Q     | GD-R-V---TQ--E     |
|                                       | <i>Thermobifida fusca</i>           | 72162419        | -----S--P--Q     | GD-R-TD--SR--E     |
|                                       | <i>Nocardiosis dassonvillei</i>     | 297561955       | -----G--P--Q     | GD-R-TD--DR--E     |
|                                       | <i>Renibacterium salmoninarum</i>   | 163841015       | -----G--P--Q     | GD-RMLD-----E      |
|                                       | <i>Sanguibacter keddieii</i>        | 269795309       | -----P--Q        | G--RILD--GI--Q     |
|                                       | <i>Rothia dentocariosa</i>          | 296935637       | I-A-Y-AQ--P--Q   | G--RVLD--R--S      |
|                                       | <i>Brachybacterium faecium</i>      | 257068681       | -----DS--P--Q    | G--EGVL---RR--E    |
|                                       | <i>Arthrobacter chlorophenicus</i>  | 220912580       | -----G--P--Q     | GG-RILD-----E      |
|                                       | <i>Acidothermus cellulolyticus</i>  | 117928318       | -I---N--P--Q     | GD-R-AD--R--E      |
| <i>Tsukamurella paurometabola</i>     | 296140243                           | -I-----K--Q     | GS---A-----H     |                    |
| <i>Corynebacterium matruchotii</i>    | 252126372                           | -IK--DNL--T--Q  | GS---LV--ER--A   |                    |
| <i>Mycobacterium leprae</i>           | 15827214                            | ---Y--N-----Q   | G-Q--A-----R     |                    |
| <i>Cellulomonas flavigena</i>         | 296129790                           | -----CP--Q      | GD-RILD--GH--S   |                    |
| <i>Geodermatophilus obscurus</i>      | 284990548                           | ---Y-SN--E--Q   | GT---ID--TE--A   |                    |
| <i>Frankia symbiont</i>               | 289642289                           | ----DH--P--Q    | GD-RVVD--SR--T   |                    |
| <i>Kribbella flavida</i>              | 284031185                           | I--Q-S--P--Q    | G--R-LT--QR--E   |                    |
| <i>Salinispora arenicola</i>          | 159038869                           | -I---S-----Q    | G--R-AD--V--G    |                    |
| <i>Micromonospora sp.</i>             | 238060138                           | -I---S-----Q    | G--R-AD--V--G    |                    |
| <i>Arthrobacter aurescens</i>         | 119962185                           | -----G--P--Q    | GG-RILD--GI--E   |                    |
| <i>Micrococcus luteus</i>             | 289705481                           | -L---AG--P--MQ  | GNAR-LD--R----   |                    |
| <i>Nakamurella multipartita</i>       | 258652975                           | -I--Y-AN--K--Q  | GS-R-AD-V----A   |                    |
| <i>Saccharomonospora viridis</i>      | 257055609                           | -I--D--G--MQ    | GD-R-VD--T--K    |                    |
| <i>Gardnerella vaginalis</i>          | 297586027                           | -IK-Y-S--P--Q   | RG-R-ID--LE--E   |                    |
| <i>Bifidobacterium animalis</i>       | 219683846                           | --K--S--P--Q    | QGNR-ID--HE--R   |                    |
| <i>Bifidobacterium angulatum</i>      | 229817561                           | --T-Y-K--P--Q   | HGNS-ID--KE--Q   |                    |
| <i>Scardovia inopinata</i>            | 294790862                           | -IK-Y-S--P--Q   | KGRR-ID--HE---   |                    |
| <i>Segniliparus rotundus</i>          | 296393041                           | -I-----R--Q     | GQD--A--KR---    |                    |
| <i>Nocardioides sp.</i>               | 119716753                           | ---Q-AA--P--Q   | GG-R-ID-LVR--G   |                    |
| <i>Clostridium bolteae</i>            | 160939917                           | -IK-YKET-----A  | GT-R-DK--EK--V   |                    |
| <i>Thermoanaerobacter tengcongens</i> | 20808250                            | -IK--KET--R---- | E--RIVD--NE--K   |                    |
| <i>Pelotomaculum thermopropionicu</i> | 147679064                           | ----KES--P----  | TH-EILDV-RE--N   |                    |
| <i>Clostridium butyricum</i>          | 182418131                           | -IK--KET-----   | PD-RVLT--TL---   |                    |
| <i>Lactobacillus casei</i>            | 116494466                           | --S-YKET-----A  | M--R-MD--KK--A   |                    |
| <i>Bacillus cellulosityticus</i>      | 283846450                           | ---YKET--T--A   | GG-PPLV--E--N    |                    |
| <i>Lactobacillus rhamnosus</i>        | 199597266                           | --S-YKET-----A  | M--R-MD--KK--V   |                    |
| <i>Streptococcus thermophilus</i>     | 55820880                            | --S-YKET-----A  | -D-RVLD--KL--E   |                    |
| <i>Alicyclobacillus acidocaldarii</i> | 218290409                           | ----YKAS--R---- | MG-R-L-S-Q---Q   |                    |
| <i>Streptococcus gallolyticus</i>     | 288904937                           | --A-YKET-----A  | -D-RILD--KL--E   |                    |
| <i>Anaeromyxobacter dehalogenans</i>  | 86156576                            | ----YSET--R--A  | G--GTVPDGI-AER   |                    |
| <i>Leptospirillum rubarum</i>         | 124514205                           | -----SET--P--L  | RGEGTPVIE-IREE   |                    |

Other  
*Actinobacteria*

Other Bacteria



Supplemental File 14

Partial sequence alignments of the protein Acetate Kinase showing a conserved insert that is uniquely found in various *Corynebacterium* species, but not in any other bacteria.

|                                     |                                       | 9                               |                  | 40                |
|-------------------------------------|---------------------------------------|---------------------------------|------------------|-------------------|
| <i>Corynebacterium</i>              | <i>Corynebacterium glutamicum</i>     | 145296751                       | SGSSSIKFQLVNPENS | AID EPYVSGLVEQIGE |
|                                     | <i>Corynebacterium efficiens</i>      | 25029146                        | -----A-H         | -T- D-F-----      |
|                                     | <i>Corynebacterium matruchotii</i>    | 225022579                       | -----D-DQH       | -T- --FA-----     |
|                                     | <i>Corynebacterium aurimucosum</i>    | 227834109                       | ----V----D--S-   | -T- T-L-----V--   |
|                                     | <i>Corynebacterium genitalium</i>     | 300780388                       | -----I-D-TA-     | -A- T-F-----      |
|                                     | <i>Corynebacterium accolens</i>       | 304567156                       | -----D-TA-       | -T- D-L-----V--   |
|                                     | <i>Corynebacterium striatum</i>       | 227505902                       | ----V----D--GT   | -T- A-L-----V--   |
|                                     | <i>Corynebacterium diphtheriae</i>    | 38234611                        | -----D-TAH       | -T- D-FA-----     |
|                                     | <i>Corynebacterium pseudotubercul</i> | 300859247                       | -----D-TQH       | -T- A-FA-----     |
|                                     | <i>Corynebacterium ammoniagenes</i>   | 296119015                       | -----I-D-ASA     | -T- --LA-----     |
|                                     | <i>Corynebacterium amycolatum</i>     | 213965190                       | -----D--KD       | STQ P-----R---    |
|                                     | <i>Corynebacterium lipophiloflavu</i> | 227547862                       | -----I-D-TS-     | -S- TAF-----K---  |
|                                     | <i>Corynebacterium jeikeium</i>       | 68535316                        | -----VLD--AN     | -TA D-F--I--K---  |
|                                     | <i>Corynebacterium glucuronolytic</i> | 227540876                       | -----I-DSDAD     | -TE D-F--V-----   |
|                                     | <i>Corynebacterium resistens</i>      | 300934586                       | -----VLD-KQG     | -LE A-FI--I--K--- |
|                                     | <i>Corynebacterium urealyticum</i>    | 172041417                       | -----VLD-SAD     | -HE --FIT-I--K--- |
|                                     | Other<br><i>Actinobacteria</i>        | <i>Rhodococcus erythropolis</i> | 226304962        | -----H-DTA        |
| <i>Rhodococcus jostii</i>           |                                       | 111019189                       | -----IH-DTG      | KASA----R---      |
| <i>Rhodococcus opacus</i>           |                                       | 226361325                       | -----IH-DTG      | KSWG---I-R---     |
| <i>Rhodococcus equi</i>             |                                       | 296037777                       | -----H-VAG       | -SVGT---R---      |
| <i>Mycobacterium intracellulare</i> |                                       | 254818870                       | ----V----D-DSG   | TALST---R---      |
| <i>Mycobacterium avium</i>          |                                       | 41409984                        | ----L----D--FG   | VAAST-I--R---     |
| <i>Nocardia farcinica</i>           |                                       | 54027319                        | -----Y--D--TG    | -VSAA---R---      |
| <i>Arcanobacterium haemolyticum</i> |                                       | 297571864                       | -----Y-----TG    | -SIA---R---       |
| <i>Beutenbergia cavernae</i>        |                                       | 229821529                       | ----L-Y----SGG   | -AVA--I--R---     |
| <i>Scardovia inopinata</i>          |                                       | 294790761                       | -----Y----L-SG   | -GLA----K---      |
| <i>Cellulomonas flavigena</i>       |                                       | 296130415                       | -----Y---I-DTH   | -VLA----R---      |
| <i>Actinomyces coleocanis</i>       | 227494859                             | ----L-Y-----G                   | AAIA----R---     |                   |

Supplemental File 15

A conserved insert in the protein Protoheme IX farnesyltransferase (CyoE) that is specific for the genus *Corynebacterium*.

|                                      |                                       | 161                                |                    | 201                       |                   |
|--------------------------------------|---------------------------------------|------------------------------------|--------------------|---------------------------|-------------------|
| <i>Corynebacterium</i>               | <i>Corynebacterium lipophiloflavu</i> | 227549231                          | AGCMPVLVGWAAVRDNV  | DDGSPDR WWQAVVLFMIFFWTPP  |                   |
|                                      | <i>Corynebacterium glucuronolytic</i> | 227488866                          | -----M----VIV--T   | QGAAN -----LV-----        |                   |
|                                      | <i>Corynebacterium matruchotii</i>    | 252126357                          | -----V---VIT--L    | PPDMPHQ -----L-----       |                   |
|                                      | <i>Corynebacterium genitalium</i>     | 258560496                          | -----M---VI----    | FDGSPDR -----L-----       |                   |
|                                      | <i>Corynebacterium diphtheriae</i>    | 38233887                           | -----V---VIT--L    | PAGTDAQ ----I----V-----   |                   |
|                                      | <i>Corynebacterium glutamicum</i>     | 19552785                           | -----V---VIV-QF    | EPGVDDQ ----I----V-----   |                   |
|                                      | <i>Corynebacterium ammoniagenes</i>   | 296117942                          | -----A----VI---A   | MDGQPDR -----L-----       |                   |
|                                      | <i>Corynebacterium jeikeium</i>       | 260578763                          | -----V---VIT--N    | GGAFGAGWSS -A--LI--V----- |                   |
|                                      | <i>Corynebacterium urealyticum</i>    | 172040680                          | -----M-----T--N    | GGAFNAGWSS -I--II--V----- |                   |
|                                      | <i>Corynebacterium aurimucosum</i>    | 227833033                          | -----AM---VI---A   | PASEPDR -----L-----       |                   |
|                                      | <i>Corynebacterium amycolatum</i>     | 213965606                          | -----M---VIT--N    | PEITGLAH ----FI--LL-----  |                   |
|                                      | <i>Corynebacterium pseudogenitali</i> | 227491495                          | -----AM---VI---A   | PAGEPDR ----I--L-----     |                   |
|                                      | <i>Corynebacterium accolens</i>       | 227503587                          | -----AM---VI---A   | PAGEPDR ----I--L-----     |                   |
|                                      | <i>Corynebacterium striatum</i>       | 227504382                          | -----AM---VI---A   | PAGEPDK ----I--L-----     |                   |
|                                      | <i>Corynebacterium kroppenstedtii</i> | 237785549                          | -----I---VIA--T    | SNHSVAG -L---A-----       |                   |
|                                      | <i>Corynebacterium efficiens</i>      | 25028249                           | -----A----VIV-QF   | PEGQPQQ ----I-----        |                   |
|                                      | Other<br><i>Actinobacteria</i>        | <i>Leifsonia xyli</i>              | 50954828           | -----I--V-TNS-            | G-AP-I--GV--L---- |
|                                      |                                       | <i>Clavibacter michiganensis</i>   | 170782337          | -----I-----TGDI           | S-AP-I----V-L---- |
|                                      |                                       | <i>Streptomyces coelicolor</i>     | 21220420           | ---L---I--S--TNSM         | S-AP-I--GVM-----  |
|                                      |                                       | <i>Streptomyces sp.</i>            | 295839556          | -----I--S--T-S-           | S-A--I--LV-----   |
|                                      |                                       | <i>Streptomyces albus</i>          | 239978836          | -----I--S--TNT-           | S-A--I--LV-----   |
|                                      |                                       | <i>Nocardiopsis dassonvillei</i>   | 297561915          | -----I-----TNSL           | D-APF---LVV-----  |
|                                      |                                       | <i>Thermobifida fusca</i>          | 72162400           | -----I-----ITERL          | D-APFI--LVV-----  |
|                                      |                                       | <i>Thermomonospora curvata</i>     | 269126449          | -----I-----TESL           | AAAPF---VV-W----  |
|                                      |                                       | <i>Kribbella flavida</i>           | 284031202          | ---F-T-I--TS-TNEL         | A-TPL---GVV-----  |
|                                      |                                       | <i>Kineococcus radiotolerans</i>   | 152966865          | ---Q--I--T---SL           | D-APF---GV--L---- |
|                                      |                                       | <i>Janibacter sp.</i>              | 84496541           | -----T-I--S--TGS-         | G-P--I--LV-----   |
|                                      |                                       | <i>Saccharopolyspora erythraea</i> | 134097899          | -----VI-----TGS-          | E-P-L-M-GVV-L---- |
|                                      |                                       | <i>Aeromicrobium marinum</i>       | 293166736          | ---F-A-I--T--TNEL         | A-AP---LVV-----   |
|                                      |                                       | <i>Tropheryma whipplei</i>         | 28493306           | -----IA-----TGSI          | D-P-I--AVV-L----  |
|                                      |                                       | <i>Xylanimonas cellulositytica</i> | 269956357          | -----FI-----TESL          | S-A--A--G-----    |
|                                      |                                       | <i>Beutenbergia cavernae</i>       | 229820648          | -----I--S--TGGL           | D-A-L--GV-----    |
|                                      |                                       | <i>Cellulomonas flavigena</i>      | 296129777          | -----VI--S--TGGI          | S-E-CL--GVV-----  |
|                                      |                                       | <i>Nocardioides sp.</i>            | 119716768          | ---F-A-I--T--TGSL         | S-VP---AVV-----   |
|                                      |                                       | <i>Propionibacterium acnes</i>     | 289428641          | ---F-P-I--T--TGS-         | R-EPL---F-V-W---- |
| <i>Saccharomonospora viridis</i>     |                                       | 257055629                          | -----VI-----TGT-   | E-P-F-M-GV-----           |                   |
| <i>Jonesia denitrificans</i>         |                                       | 256832497                          | -----FI--S--TETL   | S-G--M--LV-----           |                   |
| <i>Arthrobacter sp.</i>              |                                       | 116670645                          | ---F---IA---T-T-   | E-P-I---V--L-----         |                   |
| <i>Brevibacterium mcbrellneri</i>    |                                       | 295395296                          | -----I--S--TGSL    | ALEPFI--LVV-----          |                   |
| <i>Nakamurella multipartita</i>      |                                       | 258652473                          | -----II--S--TGSI   | G-P-W-F-GV-----           |                   |
| <i>Actinosynnema mirum</i>           |                                       | 256379192                          | -----VI--S--TGT-   | ELP-LAM-GV-----           |                   |
| <i>Kytococcus sedentarius</i>        |                                       | 256825158                          | ---I---I--S--TNSL  | D-P-L---VFV-----          |                   |
| <i>Micrococcus luteus</i>            |                                       | 239917646                          | ---F---I-----GT-   | E-P-I---LVV-L----         |                   |
| <i>Kocuria rhizophila</i>            |                                       | 184200866                          | -----I-----GTL     | E-P-F---AF--L----         |                   |
| <i>Brevibacterium linens</i>         |                                       | 260903767                          | -----I--S--TGGL    | A-E-LL--LVV-----          |                   |
| <i>Sanguibacter keddieii</i>         |                                       | 269795296                          | -----FI--S--TGGL   | S-G--A--LV-----           |                   |
| <i>Segniliparus rotundus</i>         |                                       | 296392902                          | -----A-----TGSL    | D-P-L-V--V-----           |                   |
| <i>Gordonia bronchialis</i>          |                                       | 262202302                          | -----T-----TGSL    | S-EP---GV-----            |                   |
| <i>Rhodococcus opacus</i>            |                                       | 226366377                          | -----M---S--TGSL   | S--PI--LV-----            |                   |
| <i>Nocardia farcinica</i>            |                                       | 54025542                           | -----A---S--TGTI   | G-P-LA--GV-----           |                   |
| <i>Tsukamurella paurometabola</i>    |                                       | 296140221                          | -----T-----ATGTI   | Q-P-I---LV-----           |                   |
| <i>Mycobacterium avium</i>           |                                       | 118462366                          | -----MI--S--TGTI   | Q-P-L-M-A-----            |                   |
| <i>Mycobacterium tuberculosis</i>    |                                       | 289745200                          | -----MI--S--ITGTI  | A-P-LAM-A-----            |                   |
| <i>Frankia sp.</i>                   |                                       | 158313910                          | ---F---I--S--TGT-  | G-P--L--AVV-----          |                   |
| <i>Frankia symbiont</i>              |                                       | 289642762                          | ---F---I--S--TGTI  | G-P--L--AV-----           |                   |
| <i>Acidothermus cellulolyticus</i>   |                                       | 117928335                          | ---F---I--S--TGR-  | G-P-----AV--A----         |                   |
| <i>Rhodospirillum centenum</i>       |                                       | 209966878                          | --AF-PMI----TGD-   | TLAS-I--A-----            |                   |
| <i>Brucella abortus</i>              |                                       | 189023702                          | --AF-PMI----ATGEI  | T-DSL-----L----           |                   |
| <i>Rickettsia canadensis</i>         |                                       | 157803916                          | S-AL-PVI-Y--SNTI   | SL-S-I--L--LI-----        |                   |
| <i>Thermosynechococcus elongatus</i> |                                       | 22299436                           | --AI-P-----TGEL    | S-A-W---GM--V-----        |                   |
| <i>Nodularia spumigena</i>           |                                       | 1219509021                         | --AI-A-----TGTL    | S-A-WLI-A-V-L-----        |                   |
| <i>Thiobacillus prosperus</i>        | 187424069                             | --AV-PVL--C--SGH-                  | SYESI---S-----     |                           |                   |
| <i>marine gamma proteobacterium</i>  | 119476742                             | --AL-P-I-----TNTI                  | SHEGIL-VL---V----- |                           |                   |

Supplemental File 16

A conserved insert in the LepA protein that is specific for the *Corynebacterium* Clade-1 species.

|                                          |                                       | 179                                |                       | 223                     |
|------------------------------------------|---------------------------------------|------------------------------------|-----------------------|-------------------------|
| <i>Corynebacterium</i><br><b>Clade I</b> | <i>Corynebacterium glutamicum</i>     | 19553540                           | GKTGMGVPELLDKVVELIPAP | TS EFEEAPARAMIFDSVYDTRG |
|                                          | <i>Corynebacterium aurimucosum</i>    | 227833666                          | ---E-----A-----       | --G-----V-----          |
|                                          | <i>Corynebacterium efficiens</i>      | 25028798                           | ---V-----             | SP GPS-----             |
|                                          | <i>Corynebacterium diphtheriae</i>    | 38234335                           | ---E-E-----A-----     | -T DYPD-----            |
|                                          | <i>Corynebacterium tuberculostear</i> | 255325525                          | ---E-V-----C-V-P-     | S--DA-----              |
|                                          | <i>Corynebacterium accolens</i>       | 227503095                          | ---E-V-----C-V-P-     | S--Y-P-----             |
|                                          | <i>Corynebacterium glucuronolytic</i> | 227488363                          | ---E-E-----R-CD-V--   | --HGA-----L-----        |
|                                          | <i>Corynebacterium matruchotii</i>    | 225021715                          | ---E-EA-----V-P-      | -T DYPM-----            |
|                                          | <i>Corynebacterium striatum</i>       | 227504499                          | ---E-ED-----A-V-P-    | ST -APD-----            |
|                                          | Other<br><i>Corynebacterium</i>       | <i>Corynebacterium urealyticum</i> | 172041033             | ---E-----R-C-V-H-       |
| <i>Corynebacterium jeikeium</i>          |                                       | 68535649                           | ---E-S-----R-C-V--    | VGDA-----I---           |
| <i>Corynebacterium kroppenstedtii</i>    |                                       | 237785922                          | A--D-----LCDVV--      | TGNA-----L-----         |
| <i>Corynebacterium amycolatum</i>        |                                       | 213966173                          | ---E-EQM--R-C-V--     | VGDP-----L-----         |
| <i>Gordonia bronchialis</i>              |                                       | 262203067                          | ---A-T-----E-IK-V--   | QGDP-----               |
| Other<br><i>Actinobacteria</i>           | <i>Nocardia farcinica</i>             | 54023366                           | ---V-----E-IRQV-P-    | VGDA-----               |
|                                          | <i>Mycobacterium abscessus</i>        | 169628730                          | ---E-AA--E-R----      | QGDP-----I---           |
|                                          | <i>Rhodococcus erythropolis</i>       | 226307248                          | ---K--E-IRQV--        | VGDA-G-----A---         |
|                                          | <i>Rhodococcus opacus</i>             | 226360412                          | ---K--E-RQV--         | VGDP-G-----A---         |
|                                          | <i>Tsukamurella paurometabola</i>     | 296140484                          | ---E-GA--R-I-RV--     | VGDP-----               |
|                                          | <i>Segniliparus rotundus</i>          | 296392919                          | ---E-K--E-R-V-P-      | KGDA-----F----          |
|                                          | <i>Geodermatophilus obscurus</i>      | 284990151                          | ---E-----QI-AQ--      | VG-AE-----I---          |
|                                          | <i>Pseudonocardia thermophila</i>     | 190148908                          | ---F-S-----V-P-       | VGDP-----               |
|                                          | <i>Micrococcus luteus</i>             | 289705015                          | ---V-E--R-RA-G-       | -GDA-----               |
|                                          | <i>Kocuria rhizophila</i>             | 184200951                          | ---E-E--ERI-RDV-P-    | QGVK--S-----            |
|                                          | <i>Rothia dentocariosa</i>            | 296935533                          | ---E-EA--RI-G--       | VGQA-T-----S---         |
|                                          | <i>Thermobifida fusca</i>             | 72161233                           | A--E-E--NEI-AR--P-    | VGNA-G--L-----          |
|                                          | <i>Bifidobacterium dentium</i>        | 171743010                          | ---E-A--RI-TD----     | KG-P--L-----S---        |
|                                          | <i>Frankia alni</i>                   | 111221440                          | ---Q-----NEI-RQV--    | VGPNPAG-----I---        |
|                                          | <i>Saccharomonospora viridis</i>      | 257055314                          | A--E-R--Q--QV-P-      | -GDS--P-L-----          |
| <i>Saccharopolyspora erythraea</i>       | 134098032                             | A--E-SDV--E-RQV--                  | -GVH-S-P-----         |                         |
| <i>Nakamurella multipartita</i>          | 258651785                             | ---A-K-----AE-P-                   | VGDA-----I---         |                         |
| <i>Actinosynnema mirum</i>               | 256375354                             | A--L-GD--E-RKV--                   | VGDAE-----            |                         |
| <i>Streptomyces coelicolor</i>           | 21221021                              | A--L-DV-----AEV--                  | VGVK-----S---         |                         |

## Supplemental File 17

### Signature Proteins that are specific for *Corynebacterium* Subclades

| Gene/Protein Name | Accession No. | Function     | Length (aa) | Species Specificity                          |
|-------------------|---------------|--------------|-------------|----------------------------------------------|
| NCgl0010          | NP_599262.1   | Hypothetical | 87          | <i>Corynebacterium</i> Subclade-1            |
| NCgl0032          | NP_599285.1   | Hypothetical | 270         | <i>Corynebacterium</i> Subclade-1            |
| NCgl0152          | NP_599407.1   | Hypothetical | 247         | <i>Corynebacterium</i> Subclade-1            |
| NCgl0559          | NP_599820.1   | Hypothetical | 101         | <i>Corynebacterium</i> Subclade-1            |
| NCgl0750          | NP_600012.1   | Hypothetical | 139         | <i>Corynebacterium</i> Subclade-1            |
| NCgl1091          | NP_600364.1   | Hypothetical | 165         | <i>Corynebacterium</i> Subclade-1            |
| NCgl1554          | NP_600830.1   | Hypothetical | 154         | <i>Corynebacterium</i> Subclade-1            |
| NCgl1838          | NP_601119.1   | Hypothetical | 179         | <i>Corynebacterium</i> Subclade-1            |
| NCgl1867          | NP_601149.1   | Hypothetical | 179         | <i>Corynebacterium</i> Subclade-1            |
| NCgl1870          | NP_601152.1   | Hypothetical | 206         | <i>Corynebacterium</i> Subclade-1            |
| NCgl1914          | NP_601195.1   | Hypothetical | 272         | <i>Corynebacterium</i> Subclade-1            |
| NCgl1970          | NP_601251.1   | Hypothetical | 126         | <i>Corynebacterium</i> Subclade-1            |
| NCgl2001          | NP_601281.1   | Hypothetical | 132         | <i>Corynebacterium</i> Subclade-1            |
| NCgl2018          | NP_601298.1   | Hypothetical | 75          | <i>Corynebacterium</i> Subclade-1            |
| NCgl2022          | NP_601302.1   | Hypothetical | 400         | <i>Corynebacterium</i> Subclade-1            |
| NCgl2036          | NP_601317.1   | Hypothetical | 202         | <i>Corynebacterium</i> Subclade-1            |
| NCgl2177          | NP_601457.1   | Hypothetical | 142         | <i>Corynebacterium</i> Subclade-1            |
| NCgl2225          | NP_601506.1   | Hypothetical | 188         | <i>Corynebacterium</i> Subclade-1            |
| NCgl2226          | NP_601507.1   | Hypothetical | 173         | <i>Corynebacterium</i> Subclade-1            |
| NCgl2043          | NP_601325.1   | Hypothetical | 77          | <i>Corynebacterium</i> Subclade-1            |
| NCgl2536          | NP_601826.1   | Hypothetical | 162         | <i>Corynebacterium</i> Subclade-1            |
| NCgl0048          | NP_599301.1   | Hypothetical | 157         | <i>C. glutamicum</i> and <i>C. efficiens</i> |
| NCgl0077          | NP_599330.1   | Hypothetical | 186         | <i>C. glutamicum</i> and <i>C. efficiens</i> |
| NCgl0097          | NP_599350.1   | Hypothetical | 183         | <i>C. glutamicum</i> and <i>C. efficiens</i> |
| NCgl0122          | NP_599376.1   | Hypothetical | 172         | <i>C. glutamicum</i> and <i>C. efficiens</i> |
| NCgl0138          | NP_599393.1   | Hypothetical | 128         | <i>C. glutamicum</i> and <i>C. efficiens</i> |
| NCgl0189          | NP_599445.1   | Hypothetical | 163         | <i>C. glutamicum</i> and <i>C. efficiens</i> |
| NCgl0193          | NP_599449.1   | Hypothetical | 134         | <i>C. glutamicum</i> and <i>C. efficiens</i> |
| NCgl0366          | NP_599625.1   | Hypothetical | 140         | <i>C. glutamicum</i> and <i>C. efficiens</i> |
| NCgl0404          | NP_599666.1   | Hypothetical | 94          | <i>C. glutamicum</i> and <i>C. efficiens</i> |

|          |             |              |     |                                              |
|----------|-------------|--------------|-----|----------------------------------------------|
| NCgl0473 | NP_599735.1 | Hypothetical | 60  | <i>C. glutamicum</i> and <i>C. efficiens</i> |
| NCgl0508 | NP_599769.1 | Hypothetical | 209 | <i>C. glutamicum</i> and <i>C. efficiens</i> |
| NCgl0587 | NP_599848.1 | Hypothetical | 108 | <i>C. glutamicum</i> and <i>C. efficiens</i> |
| NCgl0633 | NP_599895.1 | Hypothetical | 234 | <i>C. glutamicum</i> and <i>C. efficiens</i> |
| NCgl0643 | NP_599905.1 | Hypothetical | 63  | <i>C. glutamicum</i> and <i>C. efficiens</i> |
| NCgl0917 | NP_600183.1 | Hypothetical | 83  | <i>C. glutamicum</i> and <i>C. efficiens</i> |
| NCgl0932 | NP_600198.1 | Hypothetical | 123 | <i>C. glutamicum</i> and <i>C. efficiens</i> |
| NCgl0933 | NP_600199.1 | Hypothetical | 126 | <i>C. glutamicum</i> and <i>C. efficiens</i> |
| NCgl1045 | NP_600318.1 | Hypothetical | 79  | <i>C. glutamicum</i> and <i>C. efficiens</i> |
| NCgl1047 | NP_600320.1 | Hypothetical | 129 | <i>C. glutamicum</i> and <i>C. efficiens</i> |

These CSPs were identified by Blastp searches on different proteins from the genome of *C. glutamicum* ATCC 13032.

Subclade-1 consists of *Corynebacterium glutamicum*, *C. efficiens*, *C. aurimucosum*, *C. diphtheriae*, *C. pseudotuberculosis*, and *C. ulcerans*.

### Supplemental File 18

Partial sequence alignments of the protein translation initiation factor-IF2 showing a 2 aa deletion that is uniquely shared by various species from the orders *Corynebacteriales* and *Pseudonocardiales*, but not found in any other actinobacteria.

|                                |                              | 710       | 746                    |                     |
|--------------------------------|------------------------------|-----------|------------------------|---------------------|
| <i>Corynebacteriales</i>       | Tsakamurella paurometabola   | 296139429 | ALAARSRKRVSLLEDLDAALKE | TSQLNLIILKGDNSGTV   |
|                                | Rhodococcus equi             | 296036127 | -----I-----            | HNE-----            |
|                                | Mycobacterium leprae         | 15827818  | -----I-----S----       | -----A----          |
|                                | Mycobacterium tuberculosis   | 260206150 | -----I-----S----       | -----A----          |
|                                | Gordonia bronchialis         | 262202086 | -----I-----S----       | -----A----          |
|                                | Segniliparus rotundus        | 296394255 | E---KG-R-I-----SM---   | -----               |
|                                | Nocardia farcinica           | 54026037  | -----I-----            | --E-----A----       |
|                                | Rhodococcus equi             | 296036127 | -----I-----            | HNE-----            |
|                                | Rhodococcus opacus           | 226366092 | ---K---I-----S----     | -----               |
|                                | Corynebacterium efficiens    | 25028434  | -----S-----SV---       | --V-----A-S-        |
| <i>Pseudonocardiales</i>       | Corynebacterium diphtheriae  | 38234058  | ---KT-----SV---        | --T-----A-S-        |
|                                | Saccharomonospora viridis    | 257055492 | -EN-AR-----S----       | -NT---I-----        |
|                                | Saccharopolyspora erythraea  | 134102373 | -QN-AK-----KV---       | -N-----I-----       |
|                                | Actinosynnema mirum          | 256379831 | -N-AR-----             | ---T-I-----         |
|                                | Geodermatophilus obscurus    | 284992350 | -QN-SM---I-----        | NR---I-----         |
|                                | Micromonospora aurantiaca    | 270501203 | -SF-N--G-AT--T-MEQ---  | GE KTS---V---V--S-  |
|                                | Salinispora arenicola        | 159036966 | F-N--G-AT--T-MEQ--A    | GE KTS---V---V--S-  |
|                                | Nakamurella multipartita     | 258652417 | -QIGN -R-I---FGK--A-   | QK IE--T--I-----    |
|                                | Leifsonia xyli               | 50954463  | -QL-KA---I---FTR--E-   | GK VEA---I---V--A-  |
|                                | Tropheryma whipplei          | 28572760  | -QL-K-----FTR-IQ-      | GR VQS--M-I---V--A- |
| Other<br><i>Actinobacteria</i> | Arthrobacter aurescens       | 119964199 | -AL-KR---I---F-Q-VA-   | GK IDT-----V--A-    |
|                                | Micrococcus luteus           | 239917229 | -QL-KR---IT---F-Q-VA-  | GK LDT---I---A--A-  |
|                                | Sanguibacter keddieii        | 269795639 | KR---I---FTQ--QQ       | GK VET---V---V--A-  |
|                                | Kineococcus radiotolerans    | 152965411 | -AL-KA---IT---FTK--QQ  | GK VET-----GA-S-    |
|                                | Arcanobacterium haemolyticum | 297571195 | -TL-KR-----D--N--IE-   | GK IEN---I---S--S-  |
|                                | Mobiluncus mulieris          | 269977477 | --L-KR---T--SF-E--A    | GK VDM---I---V--S-  |
|                                | Actinomyces odontolyticus    | 293192216 | --L-KR-----F-KV-A-     | GE VDT---VI---V--A- |
|                                | Streptomyces coelicolor      | 32141270  | -AF-KRTR-----KV--A     | GE VQ-----I--A--S-  |
|                                | Acidothermus cellulolyticus  | 117928722 | -QL-A--R-RT---ILERMEK  | GE VAE-R-----V--S-  |
|                                | Frankia sp. CcI3             | 86742243  | -EL-L--G-PT--TILERM--  | GE KT-----V--S-     |
|                                | Thermobifida fusca           | 72161182  | -QQ-KASR--T-DNWQKT-E-  | GQ REE-L--I---M--S- |
|                                | Streptosporangium roseum     | 271963648 | -DM-K-GR-RT--E-FSEMEK  | GQ VDE-K--I---V--S- |
|                                | Bifidobacterium longum       | 213693051 | -QL-KR--V-----FKKKFA-  | SE IDM--IVI---S--S- |

## Supplemental File 19

Partial sequence alignment of ribosomal protein S3 showing a CSI that is uniquely shared by various species from the orders *Corynebacteriales*, *Pseudonocardiales*, *Micromonosporales* and *Glycomycetales* indicating that species from these groups shared a common ancestor exclusive of other actinobacteria.

|                                |                                    | 25               |                  | 162                  |
|--------------------------------|------------------------------------|------------------|------------------|----------------------|
|                                | <i>Corynebacterium glutamicum</i>  | 19551752         | RVAFRMRKAIQSAMRQ | P QVKGIKVVCSSRLGGAEM |
|                                | <i>Corynebacterium efficiens</i>   | 25027084         | -----            | -----                |
|                                | <i>Corynebacterium jeikeium</i>    | 68536917         | -----G-----      | -----                |
| <i>Corynebacteriales</i>       | <i>Tsakamurella paurometabola</i>  | 227978463        | -----            | N---R-Q-----         |
|                                | <i>Rhodococcus equi</i>            | 295819037        | -----            | N---R-Q-----         |
|                                | <i>Rhodococcus jostii</i>          | 111023102        | -----            | N---R-Q-----         |
|                                | <i>Gordonia bronchialis</i>        | 262203618        | -----            | N---R-Q-----         |
|                                | <i>Mycobacterium tuberculosis</i>  | 167967949        | -----            | N---R-Q-----         |
|                                | <i>Nocardia farcinica</i>          | 54022706         | -----S-----      | N---R-Q-----         |
| <i>Pseudonocardiales</i>       | <i>Actinosynnema mirum</i>         | 256380592        | -----S-----      | S-----R-Q-G-----     |
|                                | <i>Saccharomonospora viridis</i>   | 257054476        | -----TS-S-----   | -----R-Q-----        |
|                                | <i>Nakamurella multipartita</i>    | 258651369        | --S-----SM---Q-S | -----RIQ-----        |
|                                | <i>Geodermatophilus obscurus</i>   | 284992868        | --S-----M---Q-S  | -----R-Q-----T--     |
| <i>Micromonosporales</i>       | <i>Salinispora tropica</i>         | 145596428        | --S-----M---KN   | VC---R-QV-----       |
|                                | <i>Micromonospora aurantiaca</i>   | 270503787        | --S-----M---KN   | AC---R-QV-----       |
| <i>Glycomycetales</i>          | <i>Stackebrandtia nassauensis</i>  | 291298716        | --N-----S---L-N  | -T-----A-----        |
|                                | <i>Thermobifida fusca</i>          | 72163039         | -----            | KS GA---R-Q-----     |
| Other<br><i>Actinobacteria</i> | <i>Streptosporangium roseum</i>    | 271962638        | --S-----M---KS   | GA---R-Q-----        |
|                                | <i>Frankia sp. EUN1f</i>           | 288917236        | --S-----M---KG   | GA---R-Q-----        |
|                                | <i>Micrococcus luteus</i>          | 239918193        | -----K-----A     | GAQ--RIQ-----        |
|                                | <i>Rothia mucilaginosa</i>         | 255326848        | -----K-----Q-A   | GA---RIQ-----        |
|                                | <i>Catenulispora acidiphila</i>    | 256390146        | -----S-KA        | G-----QV-----        |
|                                | <i>Streptomyces coelicolor</i>     | 21223088         | --S-----SM-GT-KA | GA---IQ-G-----       |
|                                | <i>Actinomyces coleocanis</i>      | 227494551        | --S-----M---A    | GA---R-Q-----        |
|                                | <i>Beutenbergia cavernae</i>       | 229821617        | -----GM---Q-A    | GA--VR-Q-----        |
|                                | <i>Kineococcus radiotolerans</i>   | 152964663        | --S-----GM-TT-S  | GA---R-Q-A-----      |
|                                | <i>Nocardiopsis dassonvillei</i>   | 229205450        | -----M-T-KS      | GA---RIQ-G-----      |
|                                | <i>Bifidobacterium longum</i>      | 23336507         | --T-----Q-D---A  | GA---RIKL-----       |
|                                | <i>Conexibacter woesei</i>         | 284042810        | -----KR-LT---S   | GA--V--QV-----       |
|                                | <i>Propionibacterium acnes</i>     | 282855202        | -----Q---NA      | GAL--RIK-----        |
|                                | <i>Acidothermus cellulolyticus</i> | 117927521        | --S-----L---LKA  | GA--VR-QVA-----      |
|                                | <i>Clavibacter michiganensis</i>   | 148273795        | -----GL-G-Q-A    | GA--VRIQV-----       |
|                                | <i>Leifsonia xyli</i>              | 50955560         | -----GL-G-Q-A    | GS--VRIQV-----       |
|                                | <i>Cellulomonas flavigena</i>      | 229241980        | --S-----G---Q-A  | GA---R-QV-----       |
| <i>Jonesia denitrificans</i>   | 256831833                          | --S-----GM---L-A | GA---R-QY-----   |                      |

Supplemental File 20

Partial Sequence alignment of the protein Alpha-ketoglutarate decarboxylase showing a 1 aa conserved insert that is largely specific for the *Corynebacteriales*, *Pseudonocardiales* and *Micromonosporales* species. This insert is also present in *Glycomyetales* and *A. cellulolyticus*.

|                      |                                | 619                         | 650                               |                               |
|----------------------|--------------------------------|-----------------------------|-----------------------------------|-------------------------------|
| Corynebacteriales    | Segniliparus rotundus          | 296393143                   | VKYHLGAEGTYFQMFGD NEIKVSLTANPSHLE |                               |
|                      | Tsakamurella paurometabola     | 296138938                   | -----K-Y----- E ---T---V-----     |                               |
|                      | Nocardia farcinica             | 161598437                   | -----L----- - - - - -             |                               |
|                      | Gordonia bronchialis           | 262201823                   | -----K-Y----- - - - - -           |                               |
|                      | Rhodococcus opacus             | 226365480                   | -----I----- - -D-T-----           |                               |
|                      | Rhodococcus jostii             | 111022975                   | -----I----- - -D-T-----           |                               |
|                      | Rhodococcus erythropolis       | 226307609                   | -----S---I----- - -D-A-----       |                               |
|                      | Corynebacterium jeikeium       | 260577589                   | -----QQ-H-H----- - -D-Y-A-----    |                               |
|                      | Corynebacterium diphtheriae    | 38199857                    | -----HI----- - - - - -            |                               |
|                      | Corynebacterium striatum       | 227503791                   | -----S---HHI----- G-DIT-A-----    |                               |
|                      | Mycobacterium leprae           | 161723268                   | -----T-L-L----- - -D-Q-----       |                               |
|                      | Mycobacterium tuberculosis     | 294994806                   | -----T-L-L----- - -D-Q-----       |                               |
|                      | Mycobacterium bovis            | 161511534                   | -----T-L-L----- - -D-Q-----       |                               |
| Pseudonocardiales    | Nakamurella multipartita       | 258651662                   | -----K-IRP--- E GQVD-T-C-----     |                               |
|                      | Saccharomonospora viridis      | 257057028                   | -----K-R--- - -G-T-----           |                               |
|                      | Saccharopolyspora erythraea    | 134102819                   | -----K-R--- - -G-T-----S-----     |                               |
|                      | Actinosynnema mirum            | 256380243                   | -----K-R--- - -G-T-----           |                               |
| Glycomyetales        | Stackebrandtia nassauensis     | 291302596                   | -----MT-KFTTSD E HATT--VA-----    |                               |
|                      | Micromonospora aurantiaca      | 270502237                   | -----QN-KFTTPD E HAV---VV-----    |                               |
| Miocromonosporales   | Salinispora tropica            | 145596202                   | -----QN-KFTTPD E HSV---VV-----    |                               |
|                      | Acidothermus cellulolyticus    | 117927794                   | -----R-TTRD T KD-----VS-----      |                               |
| Other Actinobacteria | Leifsonia xyli                 | 50955456                    | -----T---FHGAG E--P-Y-A-----      |                               |
|                      | Clavibacter michiganensis      | 148272502                   | -----T---FRGVH E-MP-Y-A-----      |                               |
|                      | marine actinobacterium         | 88856384                    | -----T---FTAAD RQ-P-Y-A-----      |                               |
|                      | Kineococcus radiotolerans      | 152965196                   | -----T---FTGED EQT--YVA-----      |                               |
|                      | Arthrobacter aurescens         | 119963962                   | -----T---FTSDN KQT--Y-A-----      |                               |
|                      | Renibacterium salmoninarum     | 163840137                   | -----T---FTSFN --T--Y-A-----      |                               |
|                      | Rothia dentocariosa            | 296935259                   | -----T---FTSTS KQTQ-Y-A-----      |                               |
|                      | Brevibacterium linens          | 260907538                   | -----T---SFTSPA -STD-YVA-----     |                               |
|                      | Brevibacterium mcbrellneri     | 295394626                   | -----M---SFTSPD -TT--VA-----      |                               |
|                      | Kocuria rhizophila             | 184200591                   | -----T---VFSDN --TQ-Y-A-----      |                               |
|                      | Micrococcus luteus             | 289706398                   | ---M-T---FVSDA -STR-Y-A-----      |                               |
|                      | Streptomyces coelicolor        | 21223647                    | -----FTGLD EQ----V-----           |                               |
|                      | Streptomyces scabiei           | 290957458                   | -----FTGLD EQ----V-----           |                               |
|                      | Streptomyces albus             | 239982262                   | -----FTGLD EQ----V-----           |                               |
|                      | Catenulispora acidiphila       | 256396666                   | -----S-SFTALD SS-A-T-A-----       |                               |
|                      | Sanguibacter keddiei           | 269794283                   | -----T---FTSES ATT--Y-A-----      |                               |
|                      | Kytococcus sedentarius         | 256825652                   | -----TS---FTDDE --VG-Y-A-----     |                               |
|                      | Beutenbergia cavernae          | 229819770                   | -----T---M-TSPT EQTS-Y-A-----     |                               |
|                      | Cellulomonas flavigena         | 296129070                   | -----T---VFTAES ATTA-Y-A-----     |                               |
|                      | Arcanobacterium haemolyticum   | 297570946                   | -----T---V-TSPK DKVG-Y-A-----     |                               |
|                      | Xylanimonas cellulolytica      | 269957271                   | -----T---FTAES ATT--H-A-----      |                               |
|                      | Jonesia denitrificans          | 256833025                   | -----T---FTAES ATT--A-----        |                               |
|                      | Propionibacterium freudenreich | 297626222                   | -----T-QFTA-S EK----A-----        |                               |
|                      | Nocardioides sp.               | 119715972                   | -----EFEAGSK DR----VA-----        |                               |
|                      | Kribbella flavida              | 284033067                   | -----EFVSE-- DK----VA-----        |                               |
|                      | Frankia sp. CcI3               | 86742428                    | -----V-TGQD RTVP--VV-----         |                               |
|                      | Frankia alni                   | 111225327                   | -----V-TGRE RKVP--VV-----         |                               |
|                      | Acidimicrobium ferrooxidans    | 256372497                   | ---K-F--H-RTAS S-LP-T-AS-----     |                               |
|                      | Thermobifida fusca             | 72160970                    | -----T---FTTIT EK-AI--A-----      |                               |
|                      | Nocardiopsis dassonvillei      | 297562611                   | -----T---FETHD QK-RI--A-----      |                               |
|                      | Streptosporangium roseum       | 271969479                   | -----T-DFVSPD SKL-T-VV-----       |                               |
|                      | Thermomonospora curvata        | 269127876                   | -----DFESH-- AK-R--V-----         |                               |
|                      | Mobiluncus mulieris            | 227876254                   | -----T-SV-ESYE CHTQ-YIA-----      |                               |
|                      | Actinomyces odontolyticus      | 293189468                   | -----TW-V-SLDD LAT--YMA-----      |                               |
|                      | Other Bacteria                 | Roseiflexus castenholzii    | 156741514                         | -----HRAFREAGI EQMPIT-AP----- |
|                      |                                | Chloroflexus aggregans      | 219850562                         | -----RKA-RESGI A-MPIT-AP----- |
|                      |                                | Opitutaceae bacterium       | 225165118                         | -----Y-AALETTT KT-E-R-A-----  |
|                      |                                | Coralimargarita akajimensis | 294054624                         | -----Y-TKRTTHD H-VEIR-A-----  |
|                      | Verrucomicrobium spinosum      | 171913443                   | -----FQTKRRTKS--VMID-A-----       |                               |



### Supplemental File 21

Partial Sequence alignments of (A) the DNA repair RadA protein and (B) hypothetical protein Ncg1 showing two conserved inserts that are largely specific for the *Frankia* species.

|                            |                                | 28                          |                     | 60                 |                        |                         |
|----------------------------|--------------------------------|-----------------------------|---------------------|--------------------|------------------------|-------------------------|
| <b>(A)</b>                 | <i>Frankia</i>                 | Frankia sp. Eu11c           | 280964332           | LRAWQRAALDRYR      | AAS GAGSRDFLAVATPGAGK  |                         |
|                            |                                | Frankia sp. EAN1pec         | 158316891           | -----ET--          | SR- AS-G-----          |                         |
|                            |                                | Frankia alni                | 111221585           | -----V--           | SR- SS-A-----          |                         |
|                            |                                | Frankia sp. EUN1f           | 288919015           | --E-----EI--       | SRT AS-G-----          |                         |
|                            |                                | Frankia symbiont of Datisca | 289641351           | -----E--AI--       | -RA -S-A-----          |                         |
|                            |                                | Frankia sp. CcI3            | 86740086            | -----EI--          | SR- SS-A--M-----       |                         |
|                            | Other<br><i>Actinobacteria</i> | Kytococcus sedentarius      | 256824901           | ----SE--E--Q       | SLA AS-G-----          |                         |
|                            |                                | Kineococcus radiotolerans   | 152967715           | ----D--E--F        | DPE RDEPA---VT-----    |                         |
|                            |                                | Corynebacterium glutamicum  | 19553118            | -----NFL           | ANKP-----              |                         |
|                            |                                | Nocardia farcinica          | 54025739            | -----R--TK-L       | ATKP-----              |                         |
|                            |                                | Rhodococcus erythropolis    | 226306297           | -----R--TK-L       | SSSP-----              |                         |
|                            |                                | Gordonia bronchialis        | 262202175           | -----R--TK-L       | TRRP-----              |                         |
|                            |                                | Mycobacterium avium         | 118462616           | --G--R--VK-L       | AGQP-----S--           |                         |
|                            |                                | Tsukamurella paurometabola  | 296139553           | --V--R--TK-L       | T-KPQ-----             |                         |
|                            |                                | Xylanimonas cellulositytica | 269955851           | ----AE--EL--       | AKEP-----              |                         |
|                            |                                | Jonesia denitrificans       | 256832119           | ----AE--EV--       | ERQP-----              |                         |
|                            |                                | Catenulispora acidiphila    | 256390677           | ----Q---E-M        | -REP-----              |                         |
|                            |                                | Streptomyces coelicolor     | 5802839             | ----QG-MEK-L       | QDQP-----              |                         |
|                            |                                | Saccharomonospora viridis   | 257056429           | -----R--TK-L       | TRKPK-----             |                         |
|                            |                                | Actinosynnema mirum         | 256375639           | -----R--TK-L       | AS-PK-----             |                         |
|                            |                                | Thermobispora bispora       | 296268916           | ----QE-F-L-F       | RRDP-----              |                         |
|                            |                                | Arthrobacter aurescens      | 119962220           | ----QE---L-M       | TRNPK-----             |                         |
| Micrococcus luteus         |                                | 239917353                   | --Q--QE--E--L       | ETAPQ---T-----     |                        |                         |
| Kocuria rhizophila         |                                | 184200641                   | ----AE-IQ--E        | Q-QP--M-----       |                        |                         |
| Renibacterium salmoninarum |                                | 163840210                   | ----SE--HK-F        | DGDRQ-----         |                        |                         |
| Actinomyces urogenitalis   |                                | 227495762                   | ----A--KK-L         | ETMPE-----         |                        |                         |
| Thermobifida fusca         |                                | 72162780                    | --H--E-FEE-F        | RREP-----          |                        |                         |
| Nocardioopsis dassonvillei |                                | 297559356                   | -----E-FEE-F        | RREP-----          |                        |                         |
| Streptosporangium roseum   |                                | 271963257                   | ----QE-F-L-S        | RREP-----          |                        |                         |
| Leifsonia xyli             |                                | 50954856                    | ----AE---A-F        | ATEP-----A         |                        |                         |
| Propionibacterium acnes    |                                | 50842382                    | --T--E---S-L        | ATSP--W-VC-----    |                        |                         |
| Micromonospora aurantiaca  |                                | 270501464                   | -----K--VE-L        | RRRTE--T-----      |                        |                         |
| Salinispora arenicola      |                                | 159037075                   | -----R--VE-L        | RRREP--T-----      |                        |                         |
| <br>                       |                                |                             |                     |                    |                        |                         |
| <b>(B)</b>                 |                                | <i>Frankia</i>              | Frankia sp. EUN1f   | 288918321          | GIREVADPSGLFLSR        | SGGA GPTSVPGTCVTVTVEGRR |
|                            |                                |                             | Frankia sp. EAN1pec | 158312223          | -----                  | --AA-----               |
|                            | Frankia symbiont of Datisca    |                             | 289642342           | --G-----           | WHD-G PMDG-A-----A     |                         |
|                            | Frankia alni                   |                             | 4231547             | --HGI-----         | --AG -LEA-----         |                         |
|                            | Frankia sp. CcI3               |                             | 3907225             | --HGI-----         | S--- -LEA-----         |                         |
|                            | Other<br><i>Actinobacteria</i> | Bifidobacterium angulatum   | 229818203           | --E--S-----S       | N-D- -S-P-E-----F-LD-H |                         |
|                            |                                | Bifidobacterium dentium     | 171741228           | --E--S-----S       | N -SVP-E-----F-LD-H    |                         |
|                            |                                | Corynebacterium efficiens   | 259505925           | --K--P-----H       | RGSTPD--A--AMD-V-      |                         |
|                            |                                | Corynebacterium diphtheriae | 38234541            | ----P-----H        | HGSTPD--A--AMD-V-      |                         |
|                            |                                | Rhodococcus opacus          | 226363785           | --AGIS-----HH      | RAEA---A--MMD-K-       |                         |
|                            |                                | Tsukamurella paurometabola  | 296138333           | --AQ-T-----HH      | RDQAAA--A--GLD-K-      |                         |
|                            |                                | Nocardia farcinica          | 54022396            | --AC-D-----HH      | RTDP---A--AMD-K-       |                         |
|                            |                                | Mycobacterium tuberculosis  | 15610721            | --DGIV--N--DQ      | R--P-A--AI--LD-K-      |                         |
|                            |                                | Brevibacterium linens       | 260906432           | --KSLE-----        | SGSNP---L--Q--K-       |                         |
|                            |                                | Amycolatopsis mediterranei  | 300790482           | --VG-P-----M-H     | TAEP-S--AI--SL--K-     |                         |
|                            |                                | Propionibacterium acnes     | 282853369           | --M--P-----T-D     | NADPQ-----M---         |                         |
|                            |                                | Leifsonia xyli              | 50955643            | -----              | NA-P-S-----AM---       |                         |
|                            |                                | Saccharopolyspora erythraea | 134097049           | --A-----VN-        | QE-Q-E--A--M--K-       |                         |
|                            |                                | Kribbella flavida           | 284034288           | --V--S--T--V-E     | HSEP-A-----MM---       |                         |
|                            |                                | Thermobifida fusca          | 72163110            | --VGLP-----T-      | RTEP-----              |                         |
|                            |                                | Thermomonospora curvata     | 269128661           | --VGL-----T-       | REEP-----L---          |                         |
|                            |                                | Janibacter sp.              | 84497239            | --TGL-----N        | RTAA-----L---          |                         |
| Catenulispora acidiphila   |                                | 256397461                   | --GLS-----          | R-VP-----L---      |                        |                         |
| Rothia dentocariosa        |                                | 296934186                   | --AP-L----M-V--     | T-HP-A-----M---    |                        |                         |
| Micrococcus luteus         |                                | 239916720                   | --ESLD-----G        | VSEP-E-----L---    |                        |                         |
| Streptomyces coelicolor    |                                | 21221780                    | --TGL-----T-        | RAEP-----L--L---   |                        |                         |
| Kineococcus radiotolerans  |                                | 152964572                   | --VGLP-----V-S      | T-EP-A---I--L---   |                        |                         |
| Beutenbergia cavernae      |                                | 229821758                   | --EGLP-----G        | SGLVQ---A--LD---   |                        |                         |
| Bifidobacterium animalis   |                                | 183601979                   | --E--R--A-----S     | QNEP-E-----F-LD-H- |                        |                         |
| Actinomyces sp.            |                                | 269218316                   | --GL-----S          | RREN-----MAL---    |                        |                         |
| Streptomyces scabiei       | 290958385                      | --TGLT-----T-               | RDEP-----L--L---    |                    |                        |                         |
| Arthrobacter sp.           | 116668768                      | --VGL-----V--               | TKEP-S---I--L---    |                    |                        |                         |

Supplemental File 22

Partial sequence alignments of the protein glutamine phosphoribosyl amidotransferase (GPAT) depicting a 1 aa conserved insert that is commonly shared by various species from the orders Corynebacteriales, Pseudonocardiales and Micromonosporales, Glycomycetales and Frankiales, but not present in any other actinobacteria or bacteria.

|                           |                                | 284993113           | 100                 | 130           |
|---------------------------|--------------------------------|---------------------|---------------------|---------------|
| Pseudonocardiales         | Geodermatophilus obscurus      | 284993113           | GASTWENAQPTFRTEAGT  | G LALCHNGNLVN |
|                           | Amycolatopsis mediterranei     | 300790835           | --TI-----I---AT-S   | -SFA-----     |
|                           | Nakamurella multipartita       | 258655153           | -ST-----AI-DV-S     | -I--G-----    |
|                           | Actinosynnema mirum            | 256380841           | -ST-----H-AT-S      | A-S-G-----    |
|                           | Saccharopolyspora erythraea    | 291008350           | -GGS-----AT-S       | -G-----       |
| Glycomycetales            | Saccharomonospora viridis      | 257057727           | -GG-----V---K-D-    | -G-----       |
|                           | Stackebrandtia nassauensis     | 291303580           | --P-----I-S-ST-     | T I--G----I-  |
| Micromonosporales         | Micromonospora aurantiaca      | 270500765           | -G-----I-A-T---     | T I--A-----   |
|                           | Salinispora tropica            | 145592720           | -G-----I-S-AS--     | T I--A-----   |
| Corynebacteriales         | Nocardia farcinica             | 54022546            | -GV-----I---AV-S    | -G-----       |
|                           | Gordonia bronchialis           | 262200944           | -ST----S-I---D---   | -V-G-----     |
|                           | Segniliparus rotundus          | 296395406           | --PV-----V---VAS-G  | C--G-----     |
|                           | Tsukamurella paurometabola     | 296141250           | -ST----S-I---S-N    | -V-G-----     |
|                           | Rhodococcus jostii             | 111021811           | -ST-----I---A-S-    | -I--G-----    |
|                           | Rhodococcus opacus             | 226364333           | -ST-----I---A-S-    | -I--G-----    |
|                           | Mycobacterium marinum          | 183984849           | -DT-----V--N-A---   | -V-G-----     |
|                           | Mycobacterium avium            | 41406736            | -DT-----V--N-A---   | -V-G-----     |
|                           | Mycobacterium tuberculosis     | 289749323           | -DT-----V--N-A---   | -V-G-----     |
|                           | Corynebacterium jeikeium       | 68535423            | -GNS-----M--MAPD-   | D V--G-----D  |
| Frankiales                | Corynebacterium diphtheriae    | 38234487            | -GVM--S-M--V-PE--   | D V-----      |
|                           | Frankia alni                   | 111219629           | -S-----SY--ARF-G    | P I--G-----T- |
|                           | Frankia sp. CcI3               | 86738817            | -S-----SY--ARF-G    | P I--G-----T- |
| Other Actinobacteria      | Frankia sp. EuI1c              | 280964547           | -S-----SY--ARL-G    | -V--A-----T-  |
|                           | Propionibacterium acnes        | 50843417            | ---I-D-----SRQG-D   | -A-----T-     |
|                           | Propionibacterium freudenreich | 297625693           | ---V-K-----KP-PS-G  | ---A-----T-   |
|                           | Nocardioides sp. JS614         | 119718535           | ---Q-----P-AD-S     | I--G-----I-   |
|                           | Kribbella flavida              | 284028613           | -S-V-A-----S-AT-S   | V--A-----T-   |
|                           | Streptomyces roseosporus       | 239942512           | ---V-----A-AH-S     | I--G-----     |
|                           | Streptomyces coelicolor        | 21222488            | ---V-----A-AQ-S     | I--G-----     |
|                           | Catenulispora acidiphila       | 256389526           | -S-V-----A-AH-A     | V--G-----T-   |
|                           | Acidothermus cellulolyticus    | 117929279           | ---V-----A-PV-S     | I--A-----T-   |
|                           | Aeromicrobium marinum          | 293168761           | ---V-Q-----P-AT-S   | V--A-----T-   |
|                           | Thermobifida fusca             | 72163146            | -S-V-----FSARE-G    | ---G-----I-   |
|                           | Thermomonospora curvata        | 269124572           | -SP-----SSSD-S      | ---T-----I-   |
|                           | Streptosporangium roseum       | 271970169           | -S-V-----LSS--E-G   | ---A-----I-   |
|                           | Nocardioopsis dassonvillei     | 297563308           | -SPV-----Y-ARE-G    | ---G-----I-   |
|                           | Kocuria rhizophila             | 184200070           | ---H-A-----LGA-PH-- | ---A-----T-   |
|                           | Micrococcus luteus             | 289704658           | -VNK-A-----LGA-ADDG | T V--A-----   |
|                           | Arthrobacter aurescens         | 119963114           | ---H-A-----LGA-AT-- | V--A-----T-   |
|                           | Renibacterium salmoninarum     | 163840604           | -S--A-----LGA-RT--  | V--A-----T-   |
|                           | Rothia mucilaginosa            | 255326687           | ---H-A-----LG--PH-- | -C-A-----T-   |
|                           | Brevibacterium linens          | 260903930           | -SPSF-----LGP-PF--  | V--A-----T-   |
|                           | Thermobispora bispora          | 296271294           | -S-V-----LTS-AQ-G   | I--A-----I-   |
|                           | Xylanimonas cellulositytica    | 269957860           | ---V-----LGA-AS--   | V--G-----T-   |
|                           | Sanguibacter keddieii          | 269796679           | -GV-----LGA-A---    | V--G-----     |
|                           | Jonesia denitrificans          | 256833562           | -GV-----LGA-AT--    | V--G-----     |
|                           | Beutenbergia cavernae          | 229821994           | ---Q-----LGP-AS--   | V--G-----T-   |
|                           | Leifsonia xyli                 | 50955761            | ---S-Q-----LGS-SG-- | V--G-----T-   |
|                           | Cellulomonas flavigena         | 296130740           | -G-----LGP-A---     | V--G-----T-   |
|                           | Janibacter sp. HTCC2649        | 84497679            | ---I-----LGGHDG--   | V--A-----I-   |
|                           | Kytococcus sedentarius         | 256824476           | ---V-----LAGSDDR-   | ---A-----II-  |
|                           | Actinomyces odontolyticus      | 293191580           | --DV-R-----LGP-PT-- | ---A-----T-   |
| Mobiluncus curtisii       | 304390199                      | -M-S-H-----LGP-AF-- | --MA-----           |               |
| Brachybacterium faecium   | 257068085                      | -G-V-S-----LGPRHE-- | V--A-----           |               |
| Kineococcus radiotolerans | 152967984                      | -GGG-----LGD-AG--   | V--A-----T-         |               |
| Conexibacter woesei       | 284042292                      | -S-----VY--SDRREI   | --A--T-I-           |               |
| Rubrobacter xylanophilus  | 108803838                      | -SAS-----E-IGRGEVN  | V-VA-----D          |               |
| Other Bacteria            | Clostridium botulinum          | 226950309           | ---KSD---IVG-YKL-S  | I-IA-----     |
|                           | Brevibacillus brevis           | 226310188           | -S-KI-----L-FRYAQ-S | M-VA-----     |
|                           | Acidithiobacillus caldus       | 255022142           | -G-VLR-T--I-INYRH-A | F-VG-----     |
|                           | Oscillatoria sp.               | 300864572           | -S-KVV---AVVK-RL-S  | ---A-----     |
|                           | Arthrospira platensis          | 291566385           | -S-RIV---AVSE-RL-P  | V-VA-----     |
|                           | Nostoc punctiforme             | 186681365           | -S-RKV---AVLE-RL-S  | ---A-----     |
|                           | Synechocystis sp.              | 16331334            | -S-HRV---AVLP-RL-P  | ---A-----     |
| Spirochaeta smaragdinae   | 302339611                      | -G-GV----LVAH-KK-A  | V--A-----           |               |

## Supplemental File 23

A neighbor-joining distance tree for *Streptomycetales* species based upon concatenated sequences for RpoB, RpoC and Gyrase B proteins.

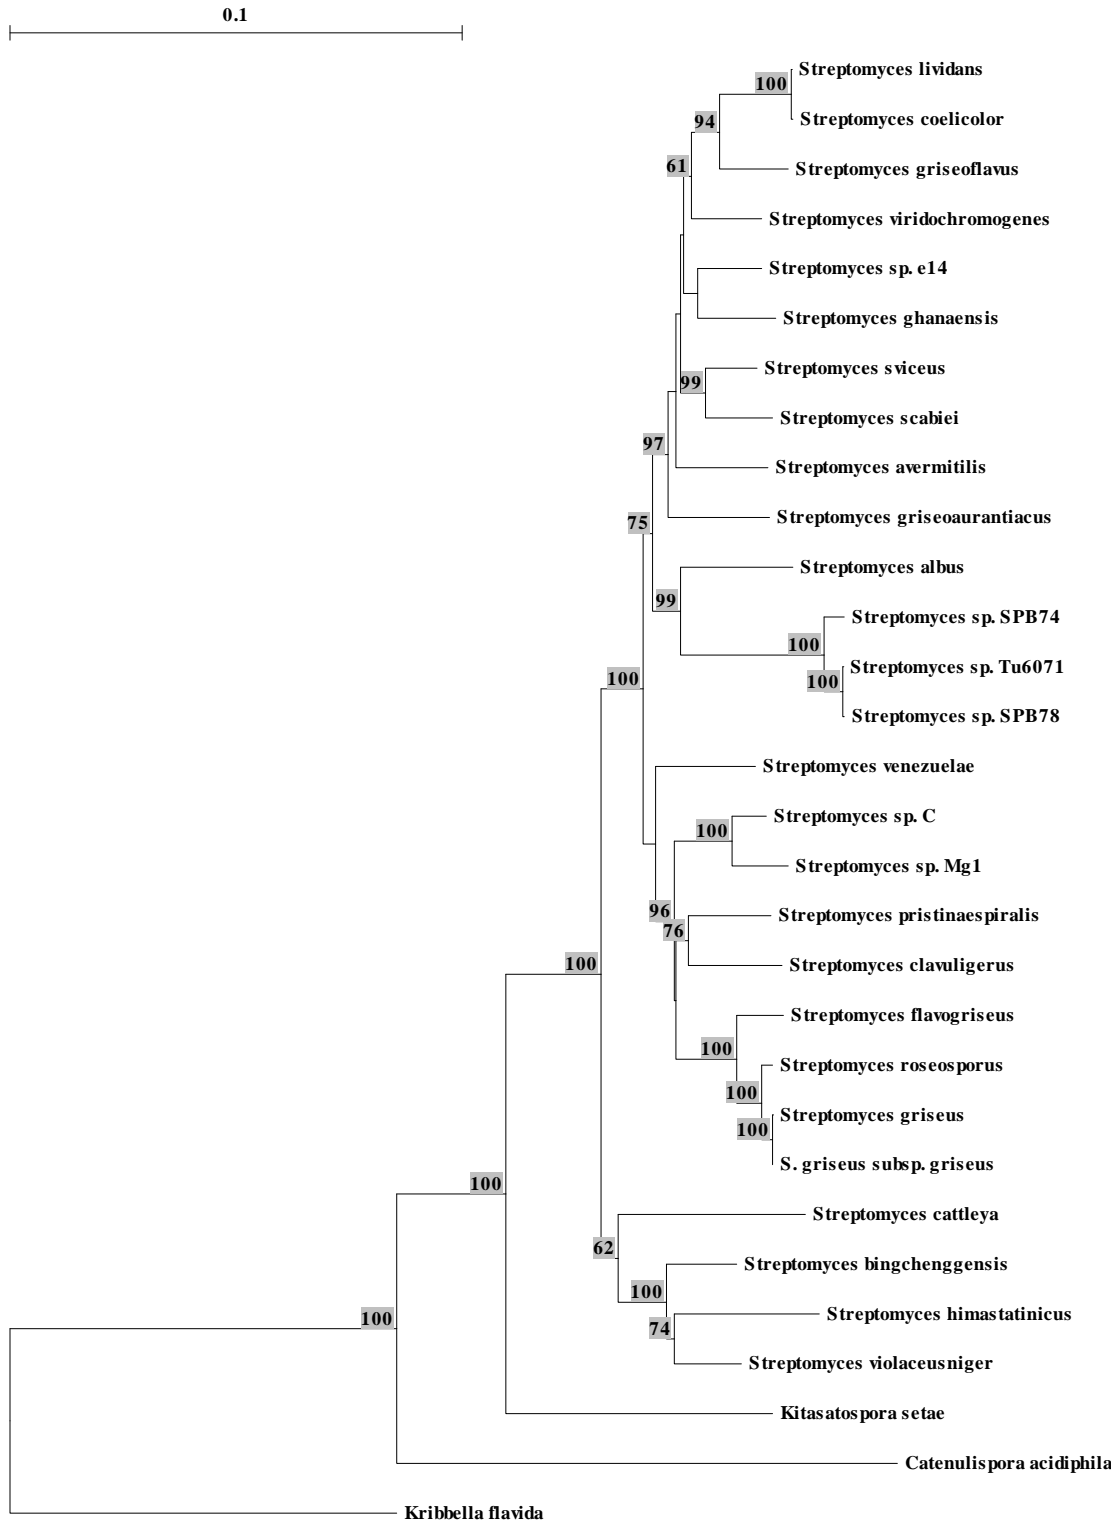

Supplemental File 24

Partial Sequence alignment of the protein Adenylate Kinase showing a 1 aa conserved insert that is specific for the *Streptomycetaceae* species

|  |                                | 108       |                           | 155                      |
|--|--------------------------------|-----------|---------------------------|--------------------------|
|  | Streptomyces sp. ACT-1         | 282868020 | DAVLDLEVPEDVVKRIAGRRCRN   | N SAHVFLHTYNPPKAEGVCDACG |
|  | Streptomyces griseus           | 182436606 | -----                     | -----                    |
|  | Streptomyces roseosporus       | 239943598 | -----R                    | -----S-S---T---V--       |
|  | Streptomyces sp. ACTE          | 282860831 | -----I---                 | D -S---V-----TD---E--    |
|  | Streptomyces pristinaespiralis | 254397968 | -----                     | -----V-S-A---E--         |
|  | Streptomyces avermitilis       | 29831490  | -----I---                 | D -----VS-K---Q---V--    |
|  | Streptomyces flavogriseus      | 260453627 | -----I---                 | D -S---V---A---T---V--   |
|  | Streptomyces griseoflavus      | 256814347 | -----A-----I---           | D -----A-S---QA---T--    |
|  | Streptomyces clavuligerus      | 254391372 | -----I---                 | D -S---V-S---AQ---V--    |
|  | Streptomyces lividans          | 1708608   | -----A-----               | D -----V-T---K---V--     |
|  | Streptomyces sp. SPB78         | 256677124 | -----I---                 | D -S---V---SK-Q---V--    |
|  | Streptomyces sp. SPB74         | 254375960 | -----I---                 | D -S---V---SK-Q---V--    |
|  | Streptomyces coelicolor        | 2924292   | -----A-----               | E PK---V-T---K---V--     |
|  | Streptomyces viridochromogenes | 256804016 | -----I---                 | D -----V-KQ-AK---V--     |
|  | Streptomyces sviveus           | 254401396 | -----E-----I---           | D -----VS-KA--QD---V--   |
|  | Streptomyces ghanaensis        | 291437818 | -----A-----I-K            | D -S---S---AK---V--      |
|  | Streptomyces sp. e14           | 294630914 | -----I---                 | D -S---V---SK-Q---V--    |
|  | Streptomyces sp. C             | 256769231 | --I-----E-----I-K         | D -----VI-AA-EV---K--    |
|  | Streptomyces sp. Mg1           | 254383151 | -----E-----               | D -S---V-AA---T---T--    |
|  | Streptomyces albus             | 239980035 | -----I---                 | D -S---VE-SK-ET---V--    |
|  | Streptomyces hygrosopicus      | 256777195 | -----T---                 | D ---T---VE-KK-ET---V--  |
|  | Streptomyces scabiei           | 290954941 | ----A--I--AQ--R-----L-Q   | D RE-I--VE---AVT---V--   |
|  | Kitasatospora setae            | 311896543 | -G-----L---               | D G-----VV---T---E--     |
|  | Frankia sp. CcI3               | 86739316  | -V--E-V-DD---R-LS---T---  | CG-IW-IDFD--SV-----R--   |
|  | Frankia sp. EUN1f              | 288917251 | -V--E-V-DD---R-LS---T---  | CG-IW--DFD--RD-----R-S   |
|  | Frankia symbiont of Datisca    | 289641145 | -V--E-V-DD---Q-LS---T---  | CG-IW-IDFD--AV-----R-N   |
|  | Frankia sp. EAN1pec            | 158317770 | -V--E-V-DD---R-LS---T---  | CG-IW--DFD-SRV--I--R-S   |
|  | Frankia alni                   | 111220567 | -V--E-V-DD---R-LS---T--A  | CG-IW--DFD--SV--L--R--   |
|  | Frankia sp. EuI1c              | 280963705 | -V--E-V-DD---R-LS---T--S  | CG-IW-VDFD--TV-D---R-N   |
|  | Acidothermus cellulolyticus    | 117927536 | -V--E-V-DD---IR-LS---T-AD | C---W-V--D---TVD---L--   |
|  | Stackebrandtia nassauensis     | 291298732 | -L--E-V-DD---IR-LS---T-HG | CGKIW-VEFDRTEV-----R--   |
|  | Micromonospora aurantiaca      | 270503772 | -L--E-V-DD---IR-LS---T--G | CGKIW-VEFDS-SR-----R--   |
|  | Salinispora arenicola          | 159039813 | -L--E-V-DD---IR-LS---T--G | CGK-W-VEFDA-SQ--R--R--   |
|  | Salinispora tropica            | 145596413 | -L--E-V-DD---IR-LS---T--G | CGK-W-VEFDA-SQ--R--R--   |

Streptomycetales

Other Actinobacteria

## Supplemental File 25

A neighbor-joining tree for sequenced *Bifidobacteriales* and *Actinomycetales* species based upon concatenated sequences for RpoB, RpoC and Gyrase B proteins.

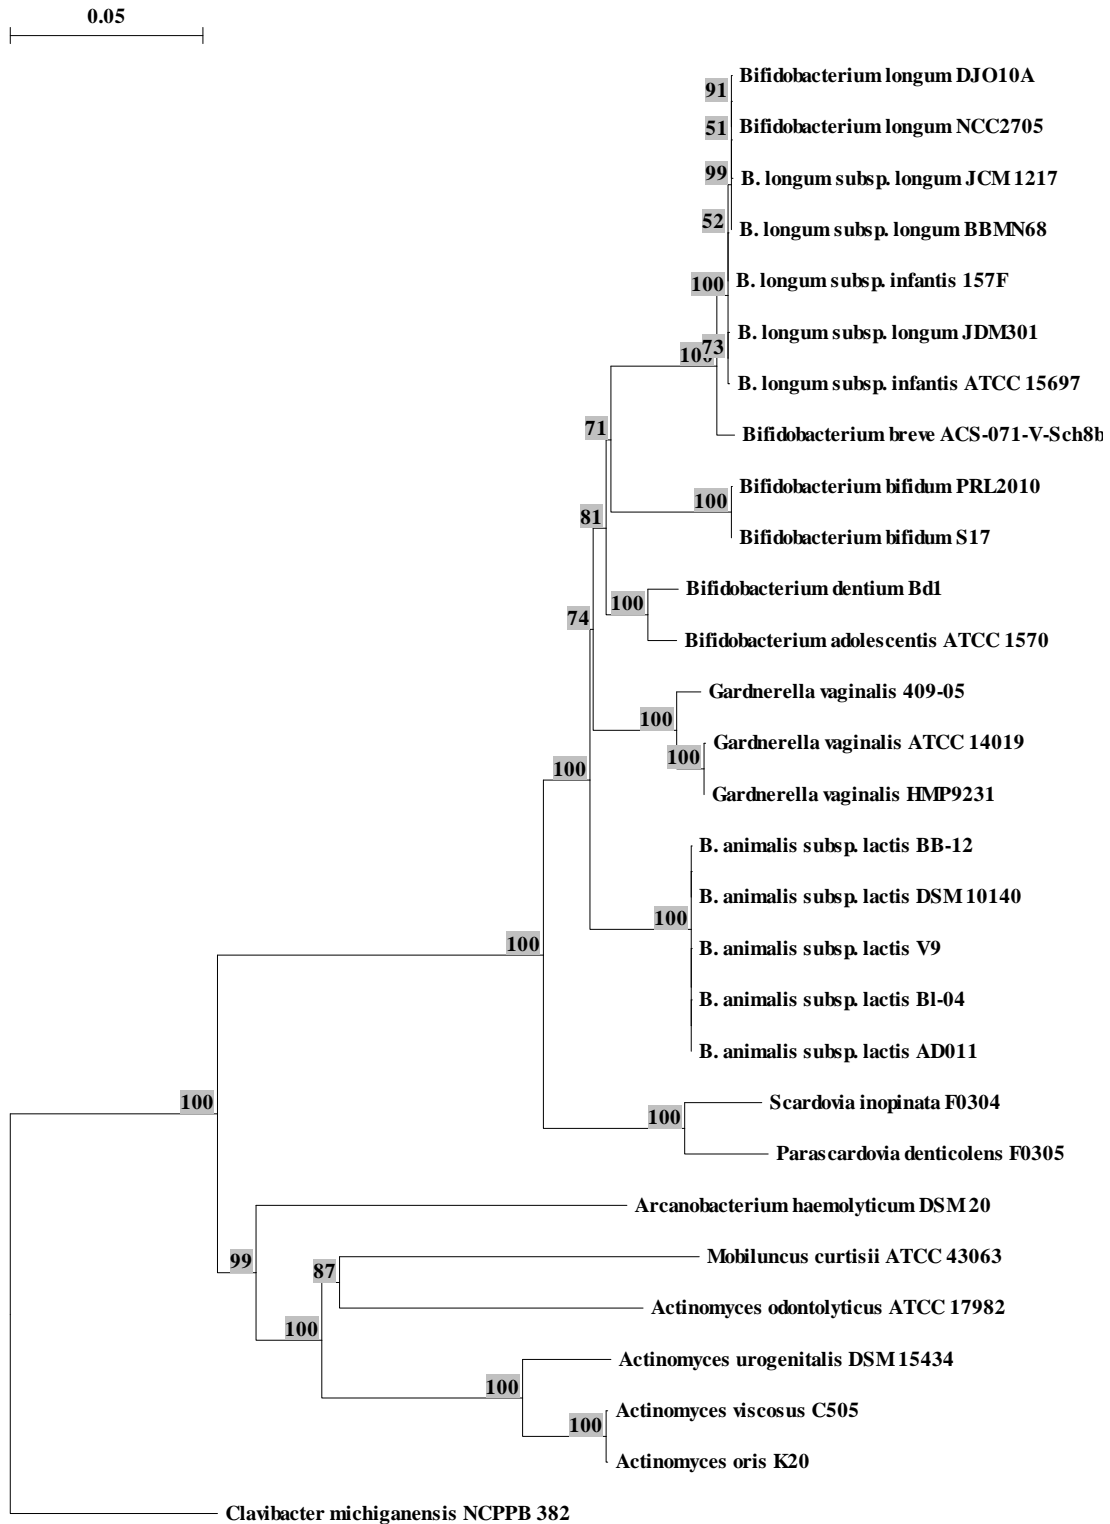

Supplemental File 26

Partial Sequence alignment of the integral membrane protein Lxx09300 showing a 6 aa conserved insert that is specific for the *Actinomycetales* species

|                                |                                 | 605              | GDPKTP               | 647                         |
|--------------------------------|---------------------------------|------------------|----------------------|-----------------------------|
| <i>Actinomycetales</i>         | Actinomyces coleocanis DSM 154  | 227494829        | APYLTDRKPYPAVVDD     | KRLVWIVDAYTTSNHYPYA         |
|                                | Actinomyces odontolyticus ATCC  | 154507576        | -----EQSA-----       | ----S-- ----V-----T-N----   |
|                                | Actinomyces urogenitalis DSM 1  | 227498179        | --W---GN-----        | D--S-- --V---L-G---T-N----  |
|                                | Arcanobacterium haemolyticum D  | 297570997        | -----S-AV-----       | SN-D-- SE----I-G---T-N----S |
|                                | Mobiluncus curtisii ATCC 43063  | 298345207        | -----SRA-----        | ----- --V---G---S---S       |
|                                | Mobiluncus mulieris 28-1        | 269977408        | -----S-A-----        | ----- --V---G---DS---S      |
|                                | Gordonia bronchialis DSM 43247  | 262203365        | --W-V-S-T---MA       | D GSIK---G---LDS---S        |
|                                | Tsukamurella paurometabola DSM  | 296140726        | --F-V-T-T--V-DS      | KS G-I--V-G---LPK----       |
|                                | Leifsonia xyli subsp. xyli str  | 50954636         | ----M-SQA----I-      | G-IK-V-G---QF--S            |
|                                | Clavibacter michiganensis subs  | 148272384        | ----I-KD---S---      | G-V---G---DQ---S            |
|                                | marine actinobacterium PHSC20C  | 88856795         | -----SDV---I--       | G-I---G---GAN---S           |
|                                | Tropheryma whipplei TW08/ 27    | 28572789         | --W-R--N---S---      | G-I---G---DQF--S            |
|                                | Sanguibacter keddieii DSM 1054  | 269796028        | -----GRV-----        | G-VK--I-G---E---S           |
|                                | Gardnerella vaginalis ATCC 140  | 297585973        | -----GRV-----        | G-VK---G---DS---S           |
|                                | Bifidobacterium dentium ATCC 2  | 171743241        | -----GRV-----        | G-VK---G---DA---S           |
| Other<br><i>Actinobacteria</i> | Bifidobacterium longum DJ010A   | 23335262         | -----GRV-----        | G-VK---G---DA---S           |
|                                | Xylanimonas cellulositytica DS  | 269955600        | --W---HRV-----       | G-VK---G---DAF--S           |
|                                | Arthrobacter aurescens TC1      | 119962109        | -----V-GNA-----      | G-VK---G---QYF--S           |
|                                | Renibacterium salmoninarum ATC  | 163839990        | ----I-GN---I--       | GKVK---G---A---S            |
|                                | Micrococcus luteus SK58         | 289705126        | ----V-TA---I--       | G-VQ-----DQF--S             |
|                                | Rothia dentocariosa ATCC 17931  | 296935199        | ---KV-S-A---IIN      | N-VQ-----T-QF--             |
|                                | Brevibacterium linens BL2       | 260906071        | --F-KI-GD-----       | GKIK--L-G---AKD---S         |
|                                | Thermobispora bispora DSM 4383  | 296270911        | --F---SD---I--       | G-I---I-----Q---S           |
|                                | Saccharomonospora viridis DSM   | 257054826        | --W-V-SD---I-        | G-IQ---G---L-N---S          |
|                                | Nakamurella multipartita DSM 4  | 134097698        | --W-K-GD-----        | GKVK--I-G---LDN---S         |
|                                | Actinosynnema mirum DSM 43827   | 258651827        | ---F-T-T-A-----      | G-I-----AAN---              |
|                                | Segniliparus rotundus DSM 4498  | 256375086        | --W-V-SD-----        | GKIT---G---LDN---           |
|                                | Corynebacterium jeikeium ATCC   | 296394538        | --W---E-A-----       | G-IQ---G---LAQF--S          |
|                                | Corynebacterium diphtheriae NC  | 260577881        | --W-T-S-T--I-I-      | G-VK-V-G---L-NL--S          |
|                                | Mycobacterium bovis AF2122/ 97  | 38233339         | --W-T-STT---I-       | G-VK---G---LTSL---          |
|                                | Mycobacterium tuberculosis H37  | 31794367         | --W-T-SAV---I-N      | -----G---LDN---S            |
|                                | Rhodococcus erythropolis PR4    | 15610329         | --W-T-SAV---I-N      | -----G---LDN---S            |
|                                | Rhodococcus jostii RHA1         | 226305718        | --W-T-GAA-----       | GKMQ--I-G---AQD---          |
|                                | Nocardia farcinica IFM 10152    | 111025452        | --W-T-SN-----G       | G-I---G---AA---S            |
|                                | Kineococcus radiotolerans SRS3  | 54026499         | --W-T-GNA-----       | E-I-----LDN---              |
|                                | Aeromicrobium marinum DSM 1527  | 152965161        | --W-M-GDA--SI--      | G-V---L-G---S---S           |
|                                | Nocardioides sp. JS614          | 293167432        | --W-V-GDV-----       | G-V---G---N---S             |
|                                | Kribbella flavida DSM 17836     | 119715766        | --W-V-SD-----        | G-IL--I-G---TDR--LS         |
|                                | Propionibacterium freudenreich  | 284033191        | --W-P-GD-----        | GQV---G---AN---S            |
|                                | Streptomyces albus J1074        | 297626196        | --W-V-QD-----        | G-I---A---STAN--NS          |
|                                | Streptomyces coelicolor A3(2)   | 239982188        | --W-I-GDA-----       | GKIQ-----G---S              |
|                                | Catenulispora acidiphila DSM 4  | 32141256         | --W-I-GDA-----       | G-IQ-----T-G---             |
|                                | Janibacter sp. HTCC2649         | 256397027        | --W-V-GTT--VAEN      | G-IL-V-G---TAA--S           |
|                                | Kytococcus sedentarius DSM 205  | 84494587         | --W-I-GNA-----       | G-VK---G---TSR--NS          |
|                                | Cellulomonas flavigena DSM 201  | 256825711        | --W---GDAF-S---      | G-I---G---SR---S            |
|                                | Jonesia denitrificans DSM 2060  | 296130298        | ----D--GRV-----      | G-VK--I-G---DQ---           |
|                                | Stackebrandtia nassauensis DSM  | 256831965        | --FI---NRV-----      | GKV--L-G---NL--S            |
|                                | Geodermatophilus obscurus DSM   | 291301839        | --F-V-GD--T---       | GKIK-VL-----DSF--S          |
|                                | Frankia sp. EUN1f               | 284992601        | --F-V-GD-----I-      | G-VQ--L-G---GS---           |
|                                | Frankia alni ACN14a             | 288922536        | --W---GD-----        | G-VT--L-G---DA---S          |
|                                | Nocardioopsis dassonvillei subs | 111225371        | --W---GD-----N       | G-IT--L-G---DG---S          |
|                                | Thermobifida fusca YX           | 297562725        | ----T-SR-----        | G-V-----DG---               |
|                                | Thermomonospora curvata DSM 43  | 72160945         | --F-V-G-A-----       | G-I-----DR---S              |
|                                | Streptosporangium roseum DSM 4  | 269127931        | --W---GN-----N       | G-I---L-G---G---            |
|                                | Brachybacterium faecium DSM 48  | 271969538        | --F-S--DN---I--      | G-V---A-----A---S           |
|                                | Salinispora tropica CNB-440     | 257069103        | --F-S--SQM-----      | DE--V-G---TTE----           |
|                                | Micromonospora sp. ATCC 39149   | 145596241        | --F-V-GD---I-        | G-VT--I-G---AAT---          |
|                                | Magnetospirillum magnetotactic  | 238060909        | --F---GD-----G       | G-VQ---G---AAT---           |
|                                | Jonquetella anthropi E3_33_E1   | 23007059         | --F---GRV-----       | G-VK---G---A---S            |
|                                | Thermanaerovibrio acidaminovor  | 260654497        | --F-LY-SD---I-       | G-II-----VTDR---S           |
| Clostridium botulinum A str. A | 269793292                       | --F-LF-SD--V-HR  | G-I--MM-G-VA-SRF--S  |                             |
| Pelobacter propionicus DSM 237 | 148378022                       | --F-Y-SD--MVIYN  | GKIY--I-----T-R---S  |                             |
| Leptospirillum ferrooxidans    | 118581966                       | --F-HF-SD--LV-DQ | K G--K--I---H-TRL--S |                             |
| Trichodesmium erythraeum IMS10 | 31747820                        | -----PD-V-L-TS   | D G--L-MI-----S-V--S |                             |
| Burkholderia ubonensis Bu      | 113477786                       | --F-RF-ND--I-LI- | GKIQ--L-G---V-DR--S  |                             |
| Desulfonatronospira thiodismut | 167588304                       | --F-S--HD--V-SN  | G--F--Q---RWF---     |                             |
|                                | 298528725                       | -F-QR--EA-SV-A-  | GKVV--Q---VTSR--S    |                             |

## Supplemental File 27

Partial Sequence alignment of the protein puruvate carboxylase showing a 4 aa conserved insert that is specific for various *Micrococcales*.

|                             |                                 | 271                 |               | 300                |
|-----------------------------|---------------------------------|---------------------|---------------|--------------------|
| Micrococcales               | Arthrobacter aurescens          | 119962530           | AGTVEFLVDTEGE | RAGQ HVFIEMNPRIQVE |
|                             | Arthrobacter chlorophenicus     | 220912315           | -----         | -----              |
|                             | Arthrobacter sp.                | 116670107           | -----V--      | -----              |
|                             | Renibacterium salmoninarum      | 163841257           | -----V--      | -----              |
|                             | Micrococcus luteus              | 289704976           | -----A--      | -----              |
|                             | Kocuria rhizophila              | 184201150           | -----A--      | -----              |
|                             | Brevibacterium linens           | 260906788           | -----LE-D-P   | -K--               |
|                             | Jonesia denitrificans           | 256832530           | -----A--      | -----              |
|                             | Sanguibacter keddieii           | 269795135           | -----V--      | -----              |
|                             | marine actinobacterium          | 88855568            | -----L-A--    | -K-E               |
|                             | Clavibacter michiganensis       | 148273061           | -----L-D-P    | -----              |
|                             | Leifsonia xyli                  | 50955170            | -----L-A--    | -----              |
|                             | Corynebacterium glutamicum      | 145294862           | -----EK-N     | -----              |
|                             | Corynebacterium striatum        | 227505376           | -----EK-N     | -----V--           |
|                             | Corynebacterium diphtheriae     | 38233253            | -----E--N     | -----              |
|                             | Corynebacterium efficiens       | 25027265            | -----EA-N     | -----              |
|                             | Corynebacterium accolens        | 227502802           | -----ER-N     | -----V--           |
|                             | Other Actinobacteria            | Mycobacterium avium | 118465096     | -----L-ER-N        |
| Mycobacterium gilvum        |                                 | 145224777           | -----L-ER-H   | -----C-----        |
| Mycobacterium smegmatis     |                                 | 11118649            | -----L-ER-H   | -----C-----        |
| Mycobacterium tuberculosis  |                                 | 294993947           | -----L-ER--   | Y-----V--          |
| Mycobacterium ulcerans      |                                 | 118617574           | -----L-QS--   | Y-----             |
| Mycobacterium marinum       |                                 | 183981762           | -----L-QS--   | Y-----             |
| Rhodococcus jostii          |                                 | 111023476           | -----L--R-N   | -----              |
| Rhodococcus opacus          |                                 | 226359928           | -----L--R-N   | -----              |
| Rhodococcus equi            |                                 | 296036945           | -----L--R-S   | -----              |
| Nocardia farcinica          |                                 | 54026162            | -----L-ER-N   | -----              |
| Gordonia bronchialis        |                                 | 262201758           | -----L-EQ-N   | -----              |
| Segniliparus rotundus       |                                 | 296393717           | -----EQ-R     | -----              |
| Tsakamurella paurometabola  |                                 | 296138666           | -----PQ-R     | -----              |
| Streptomyces scabiei        |                                 | 290962484           | -----L-RD-N   | -----              |
| Streptomyces ghanaensis     |                                 | 239933190           | -----L-RD-N   | -----              |
| Streptomyces sviveus        |                                 | 297197884           | -----L-RD-N   | -----              |
| Streptomyces lividans       |                                 | 289773786           | -----RD-N     | -----              |
| Streptomyces coelicolor     |                                 | 21219081            | -----RD-N     | -----              |
| Streptomyces lividans       |                                 | 256789905           | -----RD-N     | -----              |
| Saccharopolyspora erythraea |                                 | 134102555           | -----ER-R     | -----              |
| Saccharomonospora viridis   |                                 | 257054978           | -----RD-N     | -----              |
| Actinosynnema mirum         |                                 | 256379967           | -----L-PR-N   | Y-----             |
| Rubrobacter xylanophilus    |                                 | 108804861           | -----GED-S    | -----              |
| Geodermatophilus obscurus   |                                 | 284990282           | -----L-R--R   | -----              |
| Tropheryma whipplei         |                                 | 28493597            | -----SKMN     | -Y-----            |
| Nocardiopsis dassonvillei   |                                 | 297560125           | -----GAD-S    | -----              |
| Nocardioides sp             |                                 | 119717735           | -----L-AK-T   | YH-----            |
| Janibacter sp. HTCC2649     |                                 | 84494434            | -----LGKD-R   | Y-----             |
| Frankia symbiont of Datisca |                                 | 289643562           | -----EDQN     | -Y--I-S            |
| Frankia sp. Eu11c           |                                 | 280963811           | -----GAD-R    | YT-M-----          |
| Gordonibacter pamelaee      |                                 | 295106072           | ---I--L-ER-N  | FY-M---T-V--       |
| Arthrobacter aurescens      |                                 | 119952469           | -----L-P--N   | Y-----             |
| Other Bacteria              | Syntrophomonas wolfei           | 114566070           | -----L-KQ-N   | -Y-----            |
|                             | Clostridium carboxidivorans     | 255525687           | ---L-----KN-N | -Y-----            |
|                             | Clostridium botulinum           | 153941124           | ---L-----T-N  | -Y-----            |
|                             | Clostridium tetani              | 28204268            | -----KY-N     | -Y--V--V--         |
|                             | Bacteroides capillosus          | 154496258           | -----KD-N     | -Y-----            |
|                             | Geobacter sp. M18               | 255059903           | -----L-E--R   | YY-----            |
|                             | Anaeromyxobacter dehalogenans   | 86159437            | -----QQ-H     | -Y--V-----         |
|                             | Eubacterium saphenum            | 255994596           | -----L-KH-N   | -Y-----            |
|                             | Carboxydotherrmus hydrogenoform | 78044884            | -----L-DR-N   | FY----T-----       |
|                             | Chlamydomonas reinhardtii       | 159476498           | -----M--KD-K  | -Y-L-V--V--        |
|                             | Chloroflexus aggregans          | 219847233           | ---L--L-E--N  | YY----T-----       |
|                             | Cyanothece sp.                  | 196256021           | -----KH-N     | FY-M---T-----      |
|                             | Anaerofustis stercorihominis    | 169335857           | -----ENEK     | -Y-M-V-----        |
|                             | Blastopirellula marina          | 87310369            | -----KKS-N    | -YF--V-----        |

Supplemental File 28

Partial Sequence alignment of the DnaK (Hsp70) protein showing a 5 aa conserved insert that is mainly found in various sequenced *Bifidobacteriales*, *Actinomycetales* and *Micrococcales* species.

|                                       |                                       | 176                            | 177       | 178                  | 179               | 218                  |
|---------------------------------------|---------------------------------------|--------------------------------|-----------|----------------------|-------------------|----------------------|
|                                       |                                       | VFDLGGGTFDVSLLLEIGK            | DDGGF     | STIQVQATSGDNHLGGDDWD |                   |                      |
| <i>Bifidobacteriales</i>              | <i>Bifidobacterium animalis</i>       | 183602852                      | -----     | -E---                | -----             | -N-----              |
|                                       | <i>Bifidobacterium ruminantium</i>    | 254871275                      | -----     | -----                | -----             | -N-----              |
|                                       | <i>Bifidobacterium longum</i>         | 213691062                      | -----     | -----                | -----             | -N-----              |
|                                       | <i>Gardnerella vaginalis</i>          | 283783717                      | -----     | -----                | -----             | -N-----              |
|                                       | <i>Scardovia inopinata</i>            | 294791133                      | -----     | -E---                | -----             | -N-----              |
| <i>Actinomycetales</i>                | <i>Parascardovia denticolens</i>      | 294787136                      | -----     | -----                | -----             | -N-----              |
|                                       | <i>Actinomyces viscosus</i>           | 326773017                      | -----     | V--                  | -----             | -R-N--R-----         |
|                                       | <i>Actinomyces odontolyticus</i>      | 154507951                      | -----     | V--                  | -----             | -R-----              |
|                                       | <i>Mobiluncus mulieris</i>            | 227876398                      | -----     | V--                  | -----             | -R-N--K-----         |
|                                       | <i>Mobiluncus curtisii</i>            | 298345670                      | -----     | V--                  | -----             | -R-N--K-----         |
| <i>Micrococcales</i><br>I, II and III | <i>Arcanobacterium haemolyticum</i>   | 297570776                      | -----     | V--                  | -E---             | -R--K-----           |
|                                       | <i>Arthrobacter aurescens</i>         | 119962235                      | -----     | V--                  | -E-N-             | -R-A--R-----         |
|                                       | <i>Arthrobacter arilaitensis</i>      | 308178314                      | -----     | V--                  | -----             | -RS-A--R-----        |
|                                       | <i>Rothia dentocariosa</i>            | 300743745                      | -----     | V--                  | -E---             | -R--R-----           |
|                                       | <i>Micrococcus luteus</i>             | 289707065                      | -----     | VA-                  | -E-D-             | A--R-A--R-----       |
|                                       | <i>Rothia mucilaginosa</i>            | 283458697                      | -----     | V--                  | -----             | -R--R-----           |
|                                       | <i>Brevibacterium linens</i>          | 260904856                      | -----     | V--                  | -E-D-             | -R--R-----           |
|                                       | <i>Cellulomonas fimi</i>              | 332668977                      | -----     | V--                  | -----             | -E-R--R-----         |
|                                       | <i>Kocuria rhizophila</i>             | 184200044                      | -----     | V--                  | -E-D-             | -R-A--R-----         |
|                                       | <i>Sanguibacter keddieii</i>          | 269793786                      | -----     | V--                  | -E-D-             | -R--R-----           |
|                                       | <i>Jonesia denitrificans</i>          | 256831594                      | -----     | V--                  | -E-D-             | -R--R-----           |
|                                       | <i>Beutenbergia cavernae</i>          | 229822187                      | -----     | V--                  | -E-D-             | -R-N--R-----         |
|                                       | <i>Leifsonia xyli</i>                 | 50955833                       | -----     | V--                  | -D-               | -R-A--R-----         |
|                                       | <i>Tropheryma whipplei</i>            | 28493717                       | -----     | V--                  | -D-               | -R--R-----           |
|                                       | Other Actino<br>with insert           | <i>Brachybacterium faecium</i> | 257068394 | -----                | VS-               | -----                |
| <i>Clavibacter michiganensis</i>      |                                       | 170783106                      | -----     | V--                  | -D-               | -RS-A--R-----        |
| <i>Kineococcus radiotolerans</i>      |                                       | 152968176                      | -----     | V--                  | -E---             | -R--R-----           |
| <i>Catenulispora acidiphila</i>       |                                       | 256389313                      | -----     | V--                  | -----             | -E-K-N-----          |
| <i>Streptosporangium roseum</i>       |                                       | 271962100                      | -----     | DV-Q                 | E--H              | GFVE-K-----          |
| <i>Thermobispora bispora</i>          |                                       | 296268240                      | -----     | DV-Q                 | E--H              | GFVE-K-----          |
| <i>Amycolatopsis mediterranei</i>     |                                       | 300790966                      | -----     | E                    | -----             | GVVE-R-----          |
| <i>Saccharomonospora viridis</i>      |                                       | 257057797                      | -----     | E                    | -----             | GVVE-R-----          |
| <i>Nakamurella multipartita</i>       |                                       | 258655317                      | -----     | D                    | -----             | GVVE-K-A--K-----     |
| <i>Corynebacterium diphtheriae</i>    |                                       | 38234669                       | -----     | D                    | -----             | GVVE-R-A--E-----     |
| Other<br><i>Actinobacteria</i>        | <i>Geodermatophilus obscurus</i>      | 284993160                      | -----     | E                    | -----             | GV-E-K-A-----        |
|                                       | <i>Nocardia farcinica</i>             | 54027383                       | -----     | E                    | -----             | GVVE-R-----          |
|                                       | <i>Mycobacterium tuberculosis</i>     | 215425567                      | -----     | E                    | -----             | GVVE-C-----          |
|                                       | <i>Rhodococcus opacus</i>             | 226359569                      | -----     | E                    | -----             | GVVE-R-----          |
|                                       | <i>Gordonia bronchialis</i>           | 262204101                      | -----     | D                    | -----             | GVVE-R-----          |
|                                       | <i>Segniliparus rotundus</i>          | 296393848                      | -----     | D                    | -----             | GVVE-R-----N-----    |
|                                       | <i>Tsukamurella paurometabola</i>     | 296138223                      | -----     | D                    | -----             | GVVE-R-----N-----    |
|                                       | <i>Dietzia cinnamea</i>               | 319949484                      | -----     | D-D                  | -----             | GVVE-R-----          |
|                                       | <i>Actinomadura rubrobrunea</i>       | 19387035                       | -----     | V-D                  | -----             | GVVE-K-----          |
|                                       | <i>Thermomonospora curvata</i>        | 269124511                      | -----     | V-D                  | -----             | GVVE-K-----          |
|                                       | <i>Actinosynnema mirum</i>            | 256380930                      | -----     | L-D                  | -----             | GVVE-R-----          |
|                                       | <i>Aeromicrobium marinum</i>          | 311744450                      | -----     | D                    | -----             | GV-E-K-----          |
|                                       | <i>Pseudonocardia dioxanivorans</i>   | 331700257                      | -----     | E                    | -----             | GVVE-K-N-----        |
|                                       | <i>Thermomonospora curvata</i>        | 269124511                      | -----     | V-D                  | -----             | GVVE-K-----          |
|                                       | <i>Spirillospora albida</i>           | 19387029                       | -----     | V-D                  | -----             | GVVE-K-----          |
|                                       | <i>Kitasatospora setae</i>            | 311897203                      | -----     | D                    | -----             | GVVE-K-N-----        |
|                                       | <i>Thermobifida fusca</i>             | 72160600                       | -----     | DV-D                 | -----             | GVVE-K-H-----        |
|                                       | <i>Frankia alni ACN14a</i>            | 111225972                      | -----     | D                    | -----             | GVVE-KS---T-----     |
|                                       | <i>Nocardioides</i> sp. JS614         | 119718582                      | -----     | E                    | -----             | GVVE-K-----          |
|                                       | <i>Propionibacterium acnes</i>        | 314924503                      | -----     | D-SD                 | -----             | GVFE-K-N-----        |
|                                       | <i>Catenulispora acidiphila</i>       | 256395556                      | -----     | I-DV-D               | -----             | GVVE-RS-A--T-----F-  |
|                                       | <i>Stackebrandtia nassauensis</i>     | 291297898                      | -----     | AD                   | -----             | GV---K-N-----        |
|                                       | <i>Acidothermus cellulolyticus</i>    | 117929322                      | -----     | E                    | -----             | GIVE-K-----T-----    |
|                                       | <i>Nocardioidaceae bacterium Broa</i> | 326331832                      | -----     | E                    | -----             | GVVE-K-----          |
|                                       | <i>Streptomyces avermitilis</i>       | 29831027                       | -----     | D                    | -----             | GVVE-K-N-----        |
| <i>Rubrobacter xylanophilus</i>       | 108803627                             | -----                          | I-L-D     | -----                | GVFE-K---N-----F- |                      |
| Other<br>Bacteria                     | <i>Mycoplasma pneumoniae</i>          | 13508173                       | -Y-----   | D-AE                 | -----             | G-FE-L-A--R-----     |
|                                       | <i>Synergistetes bacterium</i>        | 295111025                      | -----     | I-DV-E               | -----             | GVFE-L-A--R-----     |
|                                       | <i>Dictyoglomus thermophilum</i>      | 206901892                      | -----     | I---E                | -----             | GVFE-I--A-N-R-----F- |
|                                       | <i>Staphylococcus aureus</i>          | 253732233                      | -----     | I-L-D                | -----             | GVFE-LS-A--K-----F-  |
|                                       | <i>Bacillus subtilis</i>              | 296333295                      | -Y-----   | I-L-D                | -----             | GVFE-RS-A--R-----F-  |
|                                       | <i>Verrucomicrobium spinosum</i>      | 171911502                      | -Y-----   | I-V---D              | -----             | GVFE-L-D--T-----     |
| <i>Synechococcus elongatus</i>        | 56751645                              | -----                          | V-V-D     | -----                | GVFE-L---T-----F- |                      |
| <i>Veillonella caviae</i>             | 38326720                              | -----                          | I-L-D     | -----                | GVFE-L---N-----F- |                      |



## Supplemental File 29

Excerpt from the sequence alignment for Cytochrome c oxidase subunit I showing a 1 aa deletion that is uniquely present in various sequenced *Propionibacteriales* species.

|                                          |                                    | 485                            | 522                                       |
|------------------------------------------|------------------------------------|--------------------------------|-------------------------------------------|
| <i>Propionibacteriales</i>               | <i>Propionibacterium acnes</i>     | 282854317                      | LAI SMLPFAWNVWIT RHPDNIEVADPWGWRGLEWATS   |
|                                          | <i>Kribbella flavida</i>           | 284030714                      | -GM-----FY--YKS -KA-LVG-D-----S-----      |
|                                          | <i>Nocardioides</i> sp. JS614      | 119714168                      | --A-T---LL--YKS AGS-PVG-D-----S-----      |
|                                          | <i>Aeromicrobium marinum</i>       | 311742842                      | -GA-T---FL-L-K- -SAKPVGLD-----S-----      |
|                                          | <i>Acidothermus cellulolyticus</i> | 117927698                      | --L--I--GI---R- W -YA-HVG-D-----AS-----   |
|                                          | <i>Brevibacterium linens</i>       | 260906804                      | -GL--V--F-----S -NA-KVT-D----Y-GS-----    |
|                                          | <i>Streptomyces ambofaciens</i>    | 126348132                      | -GL-T---LY---K- A HLGKK---D---Y--S-----   |
|                                          | <i>Kytococcus sedentarius</i>      | 256825444                      | -GA-----F---Y-- H KKG EYVNTD-----SS-----  |
|                                          | <i>Xylanimonas cellulositytica</i> | 269956803                      | -GA-----F---YT- W -RA-LVT-D----Y--S-----  |
|                                          | <i>Jonesia denitrificans</i>       | 256832678                      | --A-T---L---YV- A KNA-RVT-D----F-AS-----  |
|                                          | <i>Rothia dentocariosa</i>         | 300741502                      | --V--I-WF---Y-- A -YA-KV--D----F-GS-----  |
|                                          | <i>Saccharopolyspora erythraea</i> | 134097777                      | -GA-----L---FKS Y -YGEIVT-D----Y-NS-----  |
|                                          | <i>Thermobispora bispora</i>       | 296269270                      | -G--T---MY-M-R- W -KA-KVT-N----Y-CS-----  |
|                                          | <i>Corynebacterium genitalium</i>  | 300780571                      | -G-AF---I---YKS W -YGEVVT-D----Y-NS-----  |
|                                          | Other<br><i>Actinobacteria</i>     | <i>Mycobacterium smegmatis</i> | 118472583                                 |
| <i>Rhodococcus equi</i>                  |                                    | 296035385                      | -GA-T---L---FKS F -YGTVVT-D----Y-NS-----T |
| <i>Tsakamurella paurometabola</i>        |                                    | 296140636                      | -GA-T---V---FKS Y -YGEVVT-D----F-NS-----  |
| <i>Thermobifida fusca</i>                |                                    | 72161285                       | -G--T-I-F---V- A KKA-KVT-D----Y-CS-----   |
| <i>Leifsonia xyli</i> subsp. <i>xyli</i> |                                    | 50955129                       | --V--I--LV--YL- A --A-KVT-N----YS-S-----  |
| <i>Catenulispora acidiphila</i>          |                                    | 256390866                      | -GA-T---LY--Y-- A KRGKKVT-D----F--S-----  |
| <i>Kineococcus radiotolerans</i>         |                                    | 152967202                      | -GL-F---L---YR- A -FGERVT-D----Y-AS-----  |
| <i>Frankia alni</i> ACN14a               |                                    | 111225422                      | --M-T--LIY-L-HS Y --GALAT-D----Y-NS-----  |
| <i>Janibacter</i> sp. HTCC2649           |                                    | 84496140                       | -GA-----FY---R- W -YA-LV-TD----Y-AS-----  |
| <i>Streptosporangium roseum</i>          |                                    | 271967621                      | -GV-T---LY---M- S -RA-KVTRD----F-NS-----  |
| <i>Clavibacter michiganensis</i>         |                                    | 170781786                      | --L--I--FL-----A -TA-RVT-N----Y--S-----   |
| <i>Amycolatopsis mediterranei</i>        |                                    | 300789548                      | -GA-T---I---FKS Y -YGEIVT-D----Y-NS-----  |
| <i>Streptosporangium roseum</i>          |                                    | 271964184                      | -GA-T---LY---K- H KTA-KVT-D----F-NS-----  |
| <i>Renibacterium salmoninarum</i>        |                                    | 163840328                      | -GA-LI--F---Y-- W -SKKRV--D----F-AS-----  |
| <i>Actinosynnema mirum</i>               |                                    | 256377793                      | -GA-T---L---FKS Y -YGERVT-D----Y-NS-----  |

### Supplemental File 30

Partial Sequence alignment of the protein cgR\_2975 showing a 3 aa conserved insert that is mainly found in various sequenced *Bifidobacteriales*, *Micrococcales* and *Kineosporiales* species. The homologs for this protein were not detected in *Actinomycetales*.

|                                                      |                              | 111                                     | 151                                         |
|------------------------------------------------------|------------------------------|-----------------------------------------|---------------------------------------------|
| Bifidobacteriales<br>Micrococcales<br>Kineosporiales | Arthrobacter chlorophenicus  | 220914657                               | DYWFTVSGHRVHKTVHHYLLRATGGEL TIE NNDPQEAVDVA |
|                                                      | Arthrobacter aurescens       | 119962886                               | -----F-----                                 |
|                                                      | Rothia mucilaginosa          | 255326494                               | ----SN-T-I-----FA----- S-D ----H-I---       |
|                                                      | Brevibacterium linens        | 260904996                               | -----T-I----L----F----RS-T- -VD ----I-A-    |
|                                                      | Rothia dentocariosa          | 296934406                               | -----S--Q-I-----FC----R- ---H--H-----       |
|                                                      | Kocuria rhizophila           | 184201990                               | -----F--E--H- -T- ----H-----                |
|                                                      | Renibacterium salmoninarum   | 163842264                               | -----T-----F-----                           |
|                                                      | Micrococcus luteus           | 239918794                               | -----AR-----F----- -T- ----H-----           |
|                                                      | Mobiluncus mulieris          | 227876519                               | ---SGPDR---V---F-CETI---I -V- ----C--TAAG   |
|                                                      | Actinomyces coleocanis       | 227494172                               | ---SSLDR---V-F---EYVS--I -V- ----H--E-A-    |
|                                                      | Kineococcus radiotolerans    | 152968434                               | ---SAD-R-I--V--LF--K---T- -V- ----A--I--E   |
|                                                      | Beutenbergia cavernae        | 229822682                               | ---AGHDR---V-----E----- -T- ----H--E---     |
|                                                      | Sanguibacter keddieii        | 269797052                               | -----GDDR---V---F--E-V-Y- -V- G--S--E---    |
|                                                      | Xylanimonas cellulositytica  | 269958131                               | ---SGETR---V-----SM---R- -V- D--G--E-AF     |
|                                                      | Cellulomonas flavigena       | 296131530                               | ---SGDE---V---F--G-LH--- -V- ----G--E--E    |
|                                                      | Jonesia denitrificans        | 256883751                               | -----GDDR---V-----D-V-F- -V- G--S--E--E     |
|                                                      | Kytococcus sedentarius       | 256826445                               | ---STPER-I--R-----E-V--R- -V- E--H---Q      |
|                                                      | Janibacter sp. HCC2649       | 84497208                                | ---A-GDR-I--Y-----E-V-V- --- --H--I---      |
|                                                      | Gardnerella vaginalis        | 297586730                               | ---GTSQ---L--FA-KYVS--- SVL G--H--E-AI      |
|                                                      | Bifidobacterium breve        | 291455679                               | ---GTTQ---L---A--Q----- -V- G--H--E-AI      |
|                                                      | Bifidobacterium bifidum      | 224283940                               | ---GTSQ---L--FA--QI--D- -V- G--H--E-AI      |
|                                                      | Bifidobacterium dentium      | 171741746                               | ---GTSQ---L--FA--QI--D- -V- G--H--E-AI      |
|                                                      | Bifidobacterium longum       | 227547076                               | ---GTTQ---L--FA-KQ----- -V- G--H--E-AI      |
|                                                      | Scardovia inopinata          | 294790212                               | ---GTTQ---L---V-QKI--H- -V- G--H--E-AI      |
|                                                      | Parascardovia denticolens    | 294786231                               | ---GTTQ---L---V-Q--H- -V- G--H--E-AI        |
|                                                      | Arcanobacterium haemolyticum | 297572330                               | ---SGHDR---V---F--E-LH-T- -V- ----H--EM-E   |
|                                                      | Corynebacterium glutamicum   | 145297079                               | ---VSE-K-I-----H---YVD-D- --E-P-VTE--       |
|                                                      | Corynebacterium efficiens    | 25029485                                | ---VSE-R-I-----H---YVD-D- --E-P-VTE--       |
|                                                      | Mycobacterium leprae         | 15828458                                | ---VTDDC-----M-FS--- S-D-L-VTE--            |
|                                                      | Mycobacterium tuberculosis   | 215448255                               | ---VTD-R-----M-FL--- S-E-L-VAE--            |
|                                                      | Rhodococcus jostii           | 111020631                               | ---VTE-R-----CL--- S-E-V-VTE--              |
|                                                      | Rhodococcus erythropolis     | 229491182                               | ---VTE-R-----FL--- S-E-I-VTE--              |
|                                                      | Rhodococcus opacus           | 226362874                               | ---VTE-R-----CL--- S-E-V-VTE--              |
|                                                      | Gordonia bronchialis         | 262204639                               | ---VSE-R-I-----SV--- S-A-Y-VSE--            |
|                                                      | Nocardia farcinica           | 54027631                                | ---VTE-R-----F--SV--- S-A-V-VTS--           |
| Tsukamurella paurometabola                           | 296141888                    | ---A-E-R-----F--SWES-D- SAE-Y-VSE--     |                                             |
| Segniliparus rotundus                                | 296392448                    | ---LHGQ-K-L-----M-FQS--- S-E-V-VTE--    |                                             |
| Actinosynnema mirum                                  | 256381056                    | ---AAEDR-----F--E-L--D- S-E-V-VTE--     |                                             |
| Amycolatopsis mediterranei                           | 300791146                    | ---VAEKR-I-----F--E-L--- S-E-V-VTE--    |                                             |
| Saccharopolyspora erythraea                          | 134103798                    | ---VAGNR-----F--E-VR--- S-E-V-VTE--     |                                             |
| Saccharomonospora viridis                            | 257057897                    | ---VAERR-----F--E-D--- S-E-V-VTE--      |                                             |
| Geodermatophilus obscurus                            | 284993423                    | -F--VAD-R-----F---V--A- S-A-I-VTE--     |                                             |
| Nakamurella multipartita                             | 258655494                    | --T-VAQ-R-I--R-----ME-V--- S-A-I-VTE--  |                                             |
| Frankia sp. EAN1pec                                  | 158319039                    | -F--VAGEA-----F--LR-S-D- S-D-V-VAE--    |                                             |
| Frankia alni                                         | 111226196                    | -F--VAG-T-I-----F--LRSV-S- S-A-I-VDA--  |                                             |
| Frankia sp. EUN1f                                    | 288921202                    | -F--VAGEA-----F--VR--A- S-D-I-VEE--     |                                             |
| Streptomyces sp. AA4                                 | 256673333                    | ---VAQQR-----F--E----- S-E-V-VTE--      |                                             |
| Conexibacter woesei                                  | 284047245                    | -FYQRD-Q-IF-M-RFF-F-YRA-A- E-H-D-VEEAR  |                                             |
| Sulfurihydrogenibium azorense                        | 225847905                    | E--YRSGVDTI--F-YY--MKYV---- -PQKE-IESAE |                                             |
| Persephonella marina                                 | 225850608                    | ---YSMGLT-I--F-YY--M-YA--DI VPQKE-IDEAK |                                             |
| Roseiflexus castenholzii                             | 156743636                    | E--RAGPT-I--Y-DLF-I-Y--S- MPQTA-VD--R   |                                             |
| Chloroflexus aurantiacus                             | 163848854                    | E--RSGHG---Y-DLF--YER--V RPQIG-VD-AR    |                                             |
| Thermodesulfovibrio yellowston                       | 206891057                    | ---IME-E-YF---KYF-AEY---QV -PDW -VSSAQ  |                                             |

Other  
Actinobacteria

Other  
Bacteria

## Supplemental File 31

Partial Sequence alignment of the protein Cytochrome c oxidase subunit I (Cox1) showing a 1 aa conserved insert that is mainly found in various sequenced *Micrococcales* and *Kineosporales* species. The homologs for this protein were not detected in *Bifidobacteriales* and *Actinomycetales*.

|                             |                             | 36        | 87                                          |
|-----------------------------|-----------------------------|-----------|---------------------------------------------|
| <i>Kineosproiineales</i>    | Janibacter sp. HTCC2649     | 84496140  | GGVMALIIRAELFEPGIQLV D NPDQFNQLFTMHGTIMLLLF |
|                             | Kineococcus radiotolerans   | 152967202 | -----L-----M-VF G TKNEY--A-----V----        |
|                             | Kytococcus sedentarius      | 256825444 | --L--L-----D--M-VL Q SK-----A-----V----     |
|                             | Brachybacterium faecium     | 257068579 | --LL--G--T--W--L-V V SK--Y-----M----        |
| <i>Micrococcales</i> II     | Jonesia denitrificans       | 256832678 | --L--V-----I- Q SNE-Y-----                  |
|                             | Beutenbergia cavernae       | 229820378 | --L--L-----A--M-V Q TGE----F-----           |
|                             | Sanguibacter keddieii       | 269794878 | --L--V-----I- Q SNE-Y-----                  |
|                             | Xylanimonas cellulositytica | 269956803 | --L--V-----I- Q SKE-Y-----                  |
|                             | Cellulomonas flavigena      | 296129925 | --IL--L-----Q--MD-F Q SKE-Y--A-----         |
| <i>Micrococcales</i> I      | Rothia dentocariosa         | 296935578 | --T--LM-I-----M-IL Q TKE-----L--M-          |
|                             | Micrococcus luteus          | 239917722 | -----M-----M-IL Q TKE-Y-----L--M-           |
|                             | Brevibacterium linens       | 260906804 | -----L--D--M-II E TKE-Y-----L--M-           |
|                             | Kocuria rhizophila          | 184200931 | -----L-----Q--M-IL E TKE-Y-----M-           |
|                             | Renibacterium salmoninarum  | 163840328 | -----L-----M-IL Q TKE-Y-----M-              |
|                             | Arthrobacter aurescens      | 119964055 | -----L-----M-IL Q TKE-Y--M-----V--M-        |
| <i>Micrococcales</i> III    | Leifsonia xyli              | 50955129  | -----Q----L-V- A TKE-Y-----M-               |
|                             | Clavibacter michiganensis   | 148273022 | -----V--Q----LHV- E TKE-Y-----M-            |
|                             | marine actinobacterium      | 88856530  | -----V--Q----LSI- A TGE-Y-----M-            |
|                             | Tropheryma whipplei         | 28493211  | A----L--TQ----MH-I Q TRE-Y-----V--F--       |
| <i>Other Actinobacteria</i> | Streptomyces coelicolor     | 21220632  | -----FM---AR--L-IM SNE---A-----M-           |
|                             | Catenulispora acidiphila    | 256390866 | --LL--LM---AR--L-FL TTE---A-----M-          |
|                             | Stackebrandtia nassauensis  | 291299036 | --I---LM---AR--M-FL SV-----M-               |
|                             | Salinispora tropica         | 145593646 | --L---M---AR--L-FL S-E-----F-               |
|                             | Micromonospora aurantiaca   | 270498091 | --L---M---AR--L-FL S-E-Y-----M-             |
|                             | Frankia alni                | 111224506 | A-IL-VMM---AR--L-YF SNE-Y-----L--M-         |
|                             | Acidothermus cellulolyticus | 117927698 | A-I---LM---AR--L-FL T-EEY-----L--F--        |
|                             | Geodermatophilus obscurus   | 284989902 | --L---LM-G--AR--L-FL S-E-Y--V----V--F-      |
|                             | Nocardia farcinica          | 54026265  | --L---LM-G--AR--L-FL S-E-----FY             |
|                             | Nakamurella multipartita    | 258653794 | --LL--LM---AR--L-FL A-E-Y-----FY            |
|                             | Tsukamurella paurometabola  | 296140636 | --L---LM---A--L-FL STE-----V---Y            |
|                             | Segniliparus rotundus       | 296393777 | --L---LM---AQ--L-FL S-E-----A---Y           |
|                             | Gordonia bronchialis        | 262203170 | --L---LM-G--AH--M-FL STE-----V---MY         |
|                             | Rhodococcus opacus          | 226365908 | --L---MM---AV--M-FL SNE-----Y               |
|                             | Mycobacterium avium         | 41409189  | --L---LM-T--AA--L-FL SNE-----Y              |
|                             | Corynebacterium efficiens   | 25028974  | --L---L-----T--L-FL SNE-----V---Y           |
|                             | Corynebacterium glutamicum  | 23308947  | --L---L-----T--L-FL SNE-----V---Y           |
|                             | Streptosporangium roseum    | 271964184 | -----M---AQ--L-IT SNE-----V--M-             |
|                             | Thermomonospora curvata     | 269126195 | --LL--VV---A--L-FI SNE-Y--A----LV----       |
|                             | Thermobispora bispora       | 296269270 | --L---VM-L--AR--L-F- SNE-----               |
|                             | Thermobifida fusca          | 72161285  | A-----L---MY--M--M -NETY-----F--            |
|                             | Nocardioopsis dassonvillei  | 297560890 | --IL-VL-----F--M-IM SNEEY-----              |
|                             | Amycolatopsis mediterranei  | 300784963 | --LT--LM-G--AR--L-FL S-E-Y-----Y            |
|                             | Actinosynnema mirum         | 256375132 | --A--ML--T--AR--M-FL SNE-Y-----V---Y        |
|                             | Saccharopolyspora erythraea | 291005587 | --L--ML--G--AA--M-FL SQE-Y-----Y            |
|                             | Saccharomonospora viridis   | 257054422 | --L---L-----GQ--HFL SAE-Y--M--L--L---Y      |
|                             | Gordonia westfalica         | 40445323  | --L---LM-G--TT--M-FL STE-Y-----MY           |
|                             | Kribbella flavida           | 284030714 | -----L-----AK--L-I- -EEVY-----              |
|                             | Propionibacterium acnes     | 282854317 | --IL--L-----AY--M-FM HQET--F-----M-         |
|                             | Aeromicrobium marinum       | 293166465 | --L---V-----AQ--TTF- DDELY-----             |
|                             | Nocardioides sp. JS614      | 119717364 | --L--ML--S--AY--M-V- -DEVY-----             |
